# Supplementary material for: 2015 and 2016 winter-time air pollution in China: SO 2 emission changes derivedfrom a WRF/Chem-EnKF coupled data assimilation system
Source: Copernicus journal article supplement (doi:10.5194/acp-2018-1152), 2019-01-04
Supplement: Supplementary file [file acp-2018-1152-AC2-supplement.pdf]

---

## COMMENTS TO THE AUTHOR(S)

2015 and 2016 winter-time air pollution in China: SO<sub>2</sub> emission changes derived from a WRF-Chem-EnKF coupled data assimilation system

Manuscript ID: acp-2018-1152

Authors: Chen, et al.

### Reviewer #2

Chen *et al.* applied a data assimilation system based on the WRF-Chem model and SO<sub>2</sub> surface measurements to constrain hourly SO<sub>2</sub> emissions over China for the January months 2015 and 2016. The two months were analyzed in order to (1) evaluate the Chinese SO<sub>2</sub> emission reduction in recent years due to strict control strategies, and (2) test the ability of the WRF-Chem data assimilation to improve the emission estimates. The study is neatly conducted. An ensemble of model simulations with or without assimilation of the SO<sub>2</sub> measurements are applied to quantify the emission changes in 2015 and 2016 relative to the prior emission estimates for the year 2010. This presents a good application of the data assimilation method to assess the Chinese emission and its changes that fits the journal scope well. I think the authors shall address the following comments before publishing on ACP.

### Response:

Thanks for the valuable and insightful suggestions! We have made several changes accordingly. Please see the itemized responses as below. Revised manuscript is after the response letter.

Specific Comments:

(1) Page 2, Line 7: What does “larger spread” mean? Please explain “spread” here and in the text (Page 5, Line 1).

### Response:

Actually spread means the variance of ensemble members. In an ensemble system with  $R$  members, the ensemble mean  $\bar{X} = \frac{1}{R} \sum_{r=1}^R X_r$  and the spread (also as the ensemble variance) is

defined as  $\sqrt{\frac{\sum_{r=1}^R (X_r - \bar{X})^2}{R}}$ .

When the meteorology conditions and emissions were both perturbed, larger ensemble variances are easily achieved (in our previous study). However to investigate the exact emission-concentration relationship and investigate the DA system capability of updating emission changes, only emissions were perturbed in this study.

The abstract and introduction were rewritten, and the word “spread” were not in the two parts anymore. We have added the definition in the later text.

(2) Page 7, Line 20: The study used the proxy of absolute emission values instead of emission scaling factors in the data assimilation system, as the authors explained that it allow the detection of new emission source. How is “new emission source” represented in the model? For a grid with zero emissions in the prior? If so, it is not clear in the text how this could be estimated and whether the system would generate negative emission estimates. If not, would the use of scaling factors in logarithm also work? This needs to be better described.

**Response:**

Thanks for the suggestion, the scaling factors in logarithm should also work.

“For a grid with zero emissions in the priori emissions, the absolute emissions values would be added into the DA analysis to reflect the new emissions sources. Negative emissions estimates were not permitted in the system due to mandatory setting of the minimum values (a small positive value close to zero)”

(3) Page 9, Section 2.2.2: The section is difficult to understand for readers that did not read some papers in the reference list. What is the mathematical meaning of inflation factor? How to interpret the pointer symbol in Equations (2) and (3)? Please add more explanation.

**Response:**

“During the analysis process, the analyzed emissions of different members converge gradually, and the background emissions (calculated according to Eq. 4) of different members in the DA cycling become similar, thus leading to a small ensemble spread (variance). To maintain the spread level, an artificial inflation process (the original perturbations time the inflation factor larger than 1) was added to increase the perturbations.”

The pointer symbol means the perturbations (standard deviations) were inflated and substituted the original ones.

(4) Page 12, Section 2.4: Here the authors define  $\text{SO}_2$  measurements larger than  $650 \mu\text{g}/\text{m}^3$  to be unrealistic, however, are these “unrealistic” measurements still used in the following comparisons (for example in Figure 3 and Figure 11). Please justify.

**Response:**

According to the Air Quality Index in China, when the hourly  $\text{SO}_2$  is ranged at  $650\text{--}800 \mu\text{g m}^{-3}$ , the  $\text{SO}_2$  index would be classified as the moderate pollution level; when the hourly  $\text{SO}_2$  is higher than  $800 \mu\text{g m}^{-3}$ , the  $\text{SO}_2$  index would be calculated according to the 24-hour average, instead of hourly averages. To ensure the accuracy of the hourly data and avoid the artificial adjustment of the data, we have chosen to treat the data larger than  $650 \mu\text{g m}^{-3}$  as unrealistic. Actually the ratio of those unrealistic data is very small 0.051% (only 1513 over 2938479 valid raw hourly data, at 1600+ sites for the three months).

Those unrealistic measurements (larger than  $650 \mu\text{g m}^{-3}$ ) were not used in the following comparisons (in Figure 3 and Figure 11). However, some high values (e.g. values of  $649 \mu\text{g m}^{-3}$ ) were still kept in the comparisons. As those values might possibly be rejected in the DA system (due to large innovations) but were still used in the comparisons, large discrepancies between the observation and assimilation results would still occur.

It's hard to determine the threshold of unrealistic values and also the rejection criteria in the DA system. To obtain the overall optimization and also balance the system computation stability/efficiently, the filter processes are necessary. It should be carefully tuned for different research purposes in the future.

(5) Page 12, Line 11: The phrase “changing trend” is not proper here and throughout the text. The emission changes from 2015 to 2016 do not define a “trend”, and the “trend” is not changing. I suggest replace it by “emission changes”.

**Response:**

Thanks for the suggestion! Corrected in the text.

(6) Page 13, Line 14: Is there any difference between the experiments “NO\_DA” and “NO\_DA\_forecast”? Generally, it is not very clear how many experiments were conducted and compared in this study. It would be helpful to add a table to summarize their information.

**Response:**

Thanks for the suggestion! The experiments and the descriptions are summarized in Table 2.

**Table 2.** Experiments conducted in this study and three groups of comparisons.

|                     |         | Design of the simulation                                                                                                                                               | Purpose of the simulation                                                                      | Purpose of the comparisons                                                                                                                                                                                                                                                                                                                                                                                                                                                                                                                                |
|---------------------|---------|------------------------------------------------------------------------------------------------------------------------------------------------------------------------|------------------------------------------------------------------------------------------------|-----------------------------------------------------------------------------------------------------------------------------------------------------------------------------------------------------------------------------------------------------------------------------------------------------------------------------------------------------------------------------------------------------------------------------------------------------------------------------------------------------------------------------------------------------------|
| Control experiments | NO_DA   | 6-hr WRF-Chem cycling run with prior MEIC_2010                                                                                                                         | Generate 2015-2016 concentration fields assuming the same emissions as in 2010 prior emissions | Concentrations from CONC_DA versus that from NO_DA:<br><br>As the concentrations from CONC_DA is very close to the observations, the concentration differences between CONC_DA and NO_DA possibly indicated a model deficiency in reproducing the reality, which was mainly from the emissions changes from 2010 to 2015-2016. The assumption is that the GFS 6-hr analysis data provide good meteorological IC/BC values and that the model accurately simulated the meteorology conditions; thus, the emissions were the major deficiency in the model. |
| DA experiments      | CONC_DA | WRF-Chem (with prior MEIC_2010) and GSI 3D-var hourly DA cycle<br><br>Hourly observations were assimilated and WRF-Chem concentration output were updated              | Generate 2015-2016 concentration reanalysis fields integrating hourly observations             |                                                                                                                                                                                                                                                                                                                                                                                                                                                                                                                                                           |
|                     | EMIS_DA | WRF-Chem (with prior MEIC_2010 at the beginning and later with forecast emissions) and EnSRF hourly DA cycle<br><br>Hourly observations were assimilated, and WRF-Chem | Generate 2015-2016 analyzed emissions with hourly observations as constraints                  | Updated emissions from EMIS_DA versus prior emissions:<br>The emissions differences between the 2015 analyzed emissions and the 2010 priori emissions not only reflected the changes from 2010 to 2015 but also included the deficiencies in the 2010 priori emission.<br><br>Updated emissions between different years:                                                                                                                                                                                                                                  |

|                      |                  |                                                                                              |                                                                           |                                                                                                                                                                                                                                                                                                                                                        |
|----------------------|------------------|----------------------------------------------------------------------------------------------|---------------------------------------------------------------------------|--------------------------------------------------------------------------------------------------------------------------------------------------------------------------------------------------------------------------------------------------------------------------------------------------------------------------------------------------------|
|                      |                  | concentration output and emissions were updated                                              |                                                                           | <p>The differences between the 2016 analyzed emissions and the 2015 analyzed emissions reflected the pure emissions changes from 2015 to 2016, since the deficiencies of the 2010 priori emissions were offset in the subtraction</p> <p>The emissions control policies are discussed to investigate whether the emissions changes are reasonable.</p> |
| Forecast experiments | NO_DA_forecast   | 24-hr WRF-Chem forecast with prior MEIC_2010, chemistry IC from CONC_DA at 00UTC             | The simulation with only improved initial condition                       | <p>Concentrations from EMIS_DA_forecast versus that from NO_DA_forecast:</p> <p>The benefit by using updated emissions can be quantitatively assessed.</p>                                                                                                                                                                                             |
|                      | EMIS_DA_forecast | 24-hr WRF-Chem forecast with updated 2015-2016 emissions, chemistry IC from CONC_DA at 00UTC | The simulation with both improved initial condition and updated emissions |                                                                                                                                                                                                                                                                                                                                                        |

(7) Page 15, Line 15: For “fixed hourly factors in the priori emissions”, are the prior hourly factors provided by the MEIC inventory or defined by the model?

**Response:**

“fixed hourly factors in the priori emissions” were not provided by MEIC inventory but artificially preset by the model.

(8) Page 17, Section 4.2: A recent paper on ACP has analyzed the changes in Chinese anthropogenic emissions since 2010 based on the MEIC emission inventory. I suggest the authors compare their conclusions with the bottom-up estimates for additional evaluation. Reference: Zheng, B., Tong, D., Li, M., Liu, F., Hong, C., Geng, G., Li, H., Li, X., Peng, L., Qi, J., Yan, L., Zhang, Y., Zhao, H., Zheng, Y., He, K., and Zhang, Q.: Trends in China’s anthropogenic emissions since 2010 as the consequence of clean air actions, *Atmos. Chem. Phys.*, 18, 14095-14111, <https://doi.org/10.5194/acp-18-14095-2018>, 2018.

**Response:**

Thanks for the suggestion! Discussions compared with the reference had been added in the text.

“In the recent study by Zheng *et al.* (2018), the 2010-2017 trends of anthropogenic emissions in China were investigated. According to the “bottom-up” approach, the annual total amounts of SO<sub>2</sub> emissions were calculated to be 27.8, 16.9 and 13.4 Tg for the years 2010, 2015 and 2016, respectively. The 2010 to 2015-2016 decreases were mostly attributed to the power and industry sectors due to the strict pollution control measures implemented for these two sectors. The sectoral distribution of emissions changed significantly during the recent years, and emissions other than those from power and industry have occupied larger portions, especially for the residential sector, as the current control policies have limited effects on reducing emissions from the residential sector. According to Zheng *et al.* (2018), the national total SO<sub>2</sub> emissions decreased by 20.8% from 2015 to 2016. Our derived changes ratios for the month of January in most of the regions (NEC, XJ, SB, CC, PRD) are comparable (13.9%, 16.1%, 12.4%, 15.5%, 12.6%, respectively, see Table 3), but the change ratios for NCP, ETR and YRD are relatively smaller. As discussed in Zheng *et al.* (2018), “bottom-up” emissions estimates are uncertain due to incomplete knowledge of the underlying data, and uncertainties are larger when emissions are contributed by scattered emissions sources. Especially for the residential sector, the effectiveness of the measures (e.g., phasing out of small

high-emissions stoves, banning of coal heating) is difficult to validate due to the lack of inspections; thus, higher uncertainties may arise for regions in which residential emissions are relatively important. ”

(9) Page 21, Section 4.4: The study has presented monthly and hourly emission estimates. How about daily emission estimates? Are there significant daily variations in the constrained SO<sub>2</sub> emissions? Please clarify.

**Response:**

Yes, there are different daily variation patterns for different regions. For northern regions, the daily variation ratios (daily emissions/monthly mean emissions) ranges from 0.75-1.3. For southern regions, the ratios' ranges are relatively smaller. As it is difficult to verify the daily emission changes from reality in current stage, we chose to not discuss this issue in this paper.

(10) Page 22, Line 6: Regarding the statement “the response time from emission to ambient concentration are simplified in the assimilation system”, shouldn't the assimilation system consider physical and chemical transformations of SO<sub>2</sub> in the atmosphere? please explain why this is the case.

**Response:**

Yes, the assimilation system consider physical and chemical transformation of SO<sub>2</sub> in the atmosphere through the WRF-Chem forecast. However, in the EnSRF assimilation step, by using the observations at the current hour, the state variables including both emission for the last hour and concentrations at the current hour were both updated. It means, the reactions of SO<sub>2</sub> is only reflected in the WRF-Chem system but not in the EnKF process; considering the reaction time of SO<sub>2</sub> in the ambient, there might be some time lag of the analyzed emission. Thus ensemble algorithm taking into account of time series of observations should be more promising, although it may cause more expensive computing cost.

The description of initialization and the procedure of the DA system is added in the text to help the readers get the point.

“The WRF-Chem/EnKF assimilation system framework is shown in Fig. 1, and the workflow is briefly introduced here. The initialization and spin-up procedures of the 50-member ensemble were conducted using 72-hr ensemble forecasts ahead of the focused period through the same method used in Peng *et al.* (2016, 2018). For the 50 members, the lateral boundary conditions and initial condition of meteorology from GFS were perturbed by adding Gaussian random noise with



a zero mean and statistic background error covariances to the meteorological parameters. The emissions of the 50 members were generated by adding random noise to the priori emissions, similar to the method in Schwartz *et al.* (2014) and Peng *et al.* (2016). After the 72-hr forecasts, 50-member ensemble SO<sub>2</sub> forecasts were generated, which were used as part of the background ( $C_i^b$  in Eq. 1) in the first EMIS\_DA cycle. The other part of the background ( $E_i^b$  in Eq. 1) was the perturbed emissions of the last time step. In the EnSRF assimilation step, the state variables, including both the emissions for the last hour and the concentrations at the current hour, were updated. In the new 1-hr cycle, the background field of emissions is forecast through Eq. (4), and the background concentration is from the WRF-Chem 1-hr forecast using the updated chemical fields of the previous assimilation cycle as the ICs. With hourly cycling, the hourly analyzed emissions were obtained. ”

(11) Other corrections:

Page 7, Line 9 - “determined form” should be “determined from”

Page 7, Line 10 - defined the abbreviation “BECs”

Page 15, Line 4 - “emission decreasing” should be “emission decreases”.

Page 17, Line 17 - “that from 2015 to 2016” should be “those from 2015 to 2016”.

**Response:**

Thanks! Corrected.

**2015 and 2016 winter-time air pollution in China: SO<sub>2</sub> emission changes derived from a  
WRF-Chem/EnKF coupled data assimilation system**

Dan Chen<sup>1\*</sup>, Zhiquan Liu<sup>2\*</sup>, Junmei Ban<sup>2</sup>, Min Chen<sup>1</sup>.

<sup>1</sup>Institute of Urban Meteorology, China Meteorological Administration, Beijing, 100089, China

<sup>2</sup>National Center for Atmospheric Research, Boulder, CO, 80301, USA

**Under Review For Atmos. Chem. Phys.**

---

\* Corresponding author: Dr. Zhiquan Liu ([liuz@ucar.edu](mailto:liuz@ucar.edu)) and Dr. Dan Chen ([dchen@ium.cn](mailto:dchen@ium.cn))

## 1    **Abstract**

2            Ambient pollutants and emissions in China have changed significantly in recent years due to strict control  
3 strategies implemented by the government. It is of great interest to evaluate the emissions reduction and the  
4 air quality response using a data assimilation approach. In this study, we updated the WRF-Chem/EnKF  
5 (Weather Research and Forecasting (WRF) model coupled with the Chemistry/Ensemble Kalman Filter)  
6 system to directly analyze SO<sub>2</sub> emissions instead of using emission scaling factors, as in our previous study.  
7 Our purpose is to investigate whether the WRF-Chem/EnKF system is capable of detecting the emission  
8 deficiencies in the “bottom-up” emission inventory (2010-MEIC, Multi-resolution Emission Inventory for  
9 China), dynamically updating the spatial-temporal emission changes (2010 to 2015/2016) and, most  
10 importantly, locating the newly added sources. The 2010 January MEIC emission inventory was used as the  
11 priori (to generate background emission fields). The 2015 and 2016 January emissions were obtained by  
12 assimilating the hourly surface SO<sub>2</sub> concentration observations for January 2015 and 2016. The SO<sub>2</sub> emission  
13 changes for northern, western and southern China from 2010 to 2015 and from 2015 to 2016 (for the month  
14 of January) from the EnSRF (Ensemble Square Root Filter) approach were investigated, and the emission  
15 control strategies during the corresponding period were discussed. The January 2010-2015 differences showed  
16 inhomogeneous change patterns in different regions, including 1) significant emissions reductions in southern  
17 China; 2) significant emissions reductions in larger cities with wide increase in the surrounding suburban and  
18 rural regions in northern China, which may indicate missing raw coal combustion for winter heating that was  
19 not taken into account in the priori emission inventory; and 3) significantly large emissions increases in  
20 western China due to the energy expansion strategy. The January 2015-2016 differences showed wide  
21 emissions reductions from 2015 to 2016, indicating stricter control strategies having been fully executed  
22 nationwide. These derived emissions changes coincided with the period of the energy development national  
23 strategy in northwestern China and the regulations for the reduction of SO<sub>2</sub> emissions, indicating that the

updated DA system was possibly capable of detecting emissions deficiencies, dynamically updating the spatial-temporal emission changes (2010 to 2015/2016), and locating newly added sources.

Forecast experiments using the priori and updated emissions were conducted. Comparisons showed improvements from using updated emissions. The improvements in southern China were much larger than those in northern and western China. For the Sichuan Basin, Central China, Yangtze River Delta, and Pearl River Delta, the BIAS decreased by 61.8%-78.2% (for different regions), the RMSE decreased by 27.9%-52.2%, and the correlation coefficients increased by 12.5%-47.1%. The limitation of the study is that the analyzed emissions are still model-dependent, as the ensembles are conducted through the WRF-Chem model, and thus, the performances of the ensembles are model-dependent. Our study indicated that the WRF-Chem/EnSRF system is not only capable of improving the emissions and forecasts in the model but can also evaluate realistic emissions changes. Thus, it is possible to apply the system for emissions changes evaluation in the future.

## 1. Introduction

China is one of the fastest growing countries in the world and has produced a significant amount of air pollutant emissions. To control pollution, a series of strict control strategies has been implemented by the government since 2010, including both long-term pollution control strategies and temporary emergency measures activated under different air pollution alerts, which has led to large spatial-temporal changes of emissions (factory mitigation from urban to rural regions, industries staggering peak production, etc.). These spatial-temporal emission changes are difficult to reflect in a timely manner in both bottom-up emissions inventories and air quality models, thus creating large uncertainties. A lot of regional air quality modeling work has been conducted to evaluate the emissions reduction and air quality response by comparing the simulations of a baseline scenario and an emissions reduction scenario. However, there are large uncertainties in those simulations due to the deficiencies of the models, including the meteorological/chemical

1 initial/boundary conditions, the chemistry process parameterization and, most importantly, the uncertainties  
2 of emission inputs from the “bottom-up” emission inventories. On one hand, these three aspects lead to error  
3 accumulation and large biases compared to those from observations in the baseline scenario simulations. On  
4 the other hand, for emissions reduction scenarios during special control events, the common approach is to  
5 assume that the control policies are executed to different extents, and several emissions reduction ratios are  
6 calculated and simulated. The ratio producing results best matching the observations is assumed to be the real  
7 emissions reduction ratio. This methodology is useful for forward simulations to project the effects of  
8 emissions reduction but is not straightforward for evaluating whether the control policies are strictly  
9 implemented and whether reductions are actually achieved. The forward approach using these models can  
10 neither accurately evaluate the spatial-temporal emissions changes nor locate newly added sources that are  
11 missing from the “bottom-up” emission inventory.

12 Various Data Assimilation (DA) and inversion approaches (e.g., Evensen, 1994; Houtekamer *et al.*, 2005,  
13 Hunt *et al.*, 2007; Lee *et al.*, 2011; Pagowski and Grell, 2012, Miyakazi, *et al.*, 2012, 2013, Dai *et al.*, 2014;  
14 McLinden *et al.*, 2016) have been conducted to improve the forecast skills and optimize source emissions.  
15 The variational data assimilation approach can greatly improve the initial condition by integrating the  
16 observational data into the model forecast, but the benefits quickly disappear due to the inaccurate emissions  
17 in the model. The inversion approach (also called the “top-down” approach) has been of great interest, as the  
18 observations can be directly used to constrain and optimize emissions. There are various methods by which to  
19 implement the “top-down” emission constraints, including the adjoint approach (e.g., Guerretta *et al.*, 2017),  
20 inverse approach combining satellite/surface observational data with regional/global models, and/or Ensemble  
21 Kalman Filter (EnKF). Because the adjoint method involves a huge amount of 4Dvar code development, its  
22 application is rather limited. The inverse approach using regional/global models and/or the ensemble Kalman  
23 filter method are much more flexible; thus, they are commonly used (Miyazaki *et al.*, 2012; Tang *et al.*, 2011,

2013, 2016). For the inverse approach using satellite data, due to satellite data availability, monthly data are usually used in studies, which can only provide information on the historical trends of the total emissions amount at the regional and national levels. Compared to satellite data, the use of intensive hourly surface observations as constraints can provide more spatial-temporal characteristics of emissions; thus, they can be used to evaluate the spatial-temporal emissions changes and to locate newly added sources that are missing from the “bottom-up” emissions inventory.

In our previous study, Peng *et al.* (2017, 2018) extended the ensemble square root filter algorithm to simultaneously optimize the chemical initial conditions and the emissions input, aiming to improve the forecasting of atmospheric PM<sub>2.5</sub>, SO<sub>2</sub>, NO<sub>2</sub>, O<sub>3</sub>, CO and PM<sub>10</sub> by using the WRF-Chem/EnSRF (Weather Research and Forecasting (WRF) model coupled with the Chemistry/Ensemble Square Root Filter) system. The surface observational data are used as constraints to update initial condition and relevant emissions (through emissions scaling factors) by minimizing the error variances. The WRF-Chem is used to propagate the initial ensemble forward in time, and the EnSRF is used to assimilate the observations and update the initial chemical conditions and emissions. In air quality models, deficiencies of concentration simulations come from various aspects, including the initial condition, emissions, meteorology, chemistry, transport, etc. Especially for PM<sub>2.5</sub> and PM<sub>10</sub> simulations in China, the significant differences between the models and observations possibly come from the deficiency of the chemistry representation in the model, including missing paths of secondary organic aerosols (e.g., Chen *et al.*, 2016) and heterogeneous reactions (e.g., Zheng *et al.*, 2015), in addition to emissions. However, to reduce the error variance, emissions adjustments may compensate for the model error, which leads to unrealistic/excessive emissions adjustment. Because the purpose was to improve the forecasting of chemical species, evaluations of emission changes were not conducted in the previous two studies.

In this study, we introduce two different DA techniques to investigate SO<sub>2</sub> emissions changes. First, we

updated the EnSRF system to evaluate SO<sub>2</sub> emissions changes, for which the chemistry is better understood and represented in the model. The 2010 January MEIC (Multi-resolution Emission Inventory for China) emissions inventory (Zhang *et al.*, 2009; Lei *et al.*, 2011; He 2012; Li *et al.*, 2014) was used as the priori (to generate emissions background fields), and the 2015 and 2016 January emissions were generated by assimilating hourly surface SO<sub>2</sub> concentration observations for January 2015 and 2016. Our purpose is to investigate whether the EnKF algorithm can be capable of detecting emissions deficiencies in the “bottom-up” emissions inventory (2010-MEIC), dynamically updating the spatial-temporal emissions changes (2010 to 2015/2016) and, most importantly, locating newly added sources. Our goal is not only to improve the emissions and forecasting in the model but also to understand to what extent the DA system can accurately evaluate realistic emission changes, thus allowing it to be applied for emissions change evaluations in the future. To better detect new emissions sources, we updated the system to directly analyze SO<sub>2</sub> emissions instead of emissions scaling factors, as in Peng *et al.* (2017, 2018). In addition to the EnSRF DA algorithm, we also applied the Gridpoint Statistical Interpolation (GSI) variational DA (3D-var) system to generate the SO<sub>2</sub> reanalysis fields, which is helpful in diagnosing the priori emissions deficiency and year-to-year emissions changes in the model. Finally, to fully utilize the DA system, we investigated the combined effects of improved initial conditions (by 3D-var) and dynamically updated emissions (by EnSRF) in the forecast experiments. It has always been challenging to verify optimized “top-down” emissions from the inverse approach due to the uncertainty of the “bottom-up” emissions inventory and the lack of sufficient independent observational data (not used in the DA process). Herein, we designed three groups of comparisons to address this issue, and the details will be discussed in section 2.6.

The paper is organized as follows. In section 2, the DA system, priori emissions, observational data and experimental design are described. The reanalysis SO<sub>2</sub> fields obtained using the GSI 3D-var DA system are analyzed in section 3, focusing on the possible indications of priori emissions deficiency and year-to-year

(2015-2016) changes. Section 4 describes the results from the emissions assimilation experiment using the updated WRF-Chem/EnKF system. This section starts with the evaluation of the ensemble performance to verify the DA system capability. Then, the derived emissions changes (2010 to 2015, 2015 to 2016) obtained by the EnSRF approach are given spatially throughout the whole domain and in 8 different regions with inhomogeneous spatial patterns. The temporal factors derived from the assimilation experiment are also given in section 4. To evaluate the accuracy of the analyzed 2015 and 2016 emissions, two sets of forecast experiments with the priori emissions and the analyzed emissions, respectively, were conducted and discussed. The details are given in section 5, and the conclusions follow in section 6.

## 2. Model description, observations and methodology

We applied two different DA techniques. In the first approach, we extended the Gridpoint Statistical Interpolation (GSI) 3D-var DA system originally developed by Liu *et al.* (2011) and recently updated by Chen *et al.* (2018) to assimilate SO<sub>2</sub> observations, aiming to generate SO<sub>2</sub> reanalysis fields. In the later approach, we updated the EnKF DA system (that used in Peng *et al.*, 2017) to optimize SO<sub>2</sub> emissions changes using surface observations as constraints. The WRF-Chem configurations are the same as those in Chen *et al.* (2018), and the update of the GSI 3D-var DA system is also built upon Chen *et al.* (2018); thus, only simple descriptions are given in this section. A further description of the WRF-Chem/EnKF DA system is given, and the priori emissions, observations and experimental design are introduced in detail.

### 2.1 WRF-Chem configuration

WRF-Chem model version 3.6.1 was used in this study (Grell *et al.*, 2005; Fast *et al.*, 2006). The parameterizations were identical to those of Chen *et al.*, (2016), and they are listed in Table 1. The model horizontal resolution is 40 km, and the domain covers most of China and the surrounding regions (Fig. 2). There are 57 vertical levels extending from the surface to 10 hPa. It should be noted that uncertainties might



1 be produced in the analysis due to neglecting the rapid urbanization/land use changes from 2010 to 2015/2016.

## 2 **2.2 Priori emissions**

3 The Multi-resolution Emission Inventory for China (MEIC) (Zhang et al., 2009; Lei et al., 2011; He 2012;  
4 Li et al., 2014) for January 2010 is used as the priori emission input. Unlike in other countries, the national  
5 emissions inventories in China (e.g., NEI05-08-11-14-17) are provided in a timely manner and updated for  
6 the public. It was previously stated that “there are no official data about how much air pollutants are emitted  
7 by China every year. The inventories developed by researchers often lag several years behind the present”  
8 (Zheng *et al.*, 2018). MEIC is the only publicly available emissions inventory dataset released by the Tsinghua  
9 University research community. In the MEIC, the total amount of sectoral emissions at the national and  
10 provincial levels has generally been estimated based on the “bottom-up” approach, which relied on available  
11 statistical information concerning activities (energy, industrial production, vehicles, etc.), emissions factors  
12 and end-pipe control levels. Due to the large burden of work and the availability of statistical data, the MEIC  
13 emissions inventory is not updated annually (e.g., the public versions are MEIC-2010-2012); thus, there are  
14 always a few years of time-lag when applying MEIC EI for research studies. In addition, to drive the regional  
15 air quality models, the annual/monthly total amounts of emissions at the national and provincial level are  
16 allocated spatially and temporally to generate hourly gridded emissions input for the model. Concerning  
17 temporal allocation, as many emissions sources have large diurnal and weekly variability that is not fully  
18 represented, arbitrary hourly/weekly factors were used in preparing the hourly gridded emissions for the air  
19 quality models. Thus, the uncertainties of the statistical information and the spatial-temporal allocation could  
20 both cause inaccurate representation of the hourly gridded emissions input and affect the performance of the  
21 model application.

22 The preprocess used to convert the original emissions inventory (in  $0.25 \times 0.25$  degree) to match the  
23 model grid spacing (40 km) is the same as that used in Chen *et al.* (2018). The spatial distribution of priori  
24 SO<sub>2</sub> emissions in the simulation domain is shown in Fig. 2. A number of studies have revealed the uncertainties

1 of the “bottom-up” emissions inventories, including the energy statistics at the national and provincial levels  
2 (e.g., Hong *et al.*, 2017) and emissions factors from different industry sectors (e.g., Zhao *et al.*, 2011, 2017).  
3 Our purpose is to investigate not only the uncertainty of the priori MEIC emissions but also the capability of  
4 the DA system to dynamically update the SO<sub>2</sub> emissions using surface observations as constraints. For this  
5 purpose, the changes of SO<sub>2</sub> emissions from the priori emission year (2010) to our focus years (2015 and 2016)  
6 are emphasized.

7       There are several different driving factors in different regions that may lead to inhomogeneous changing  
8 trends during the examined years (especially from 2010 to 2015). As the Chinese government has implemented  
9 desulfurization legislation (since 2005-2006 but with stricter control of the actual use of installations since  
10 2008-2009) and strict control strategies to ensure the air quality during winter seasons since 2013, significant  
11 SO<sub>2</sub> emissions reductions are expected to have occurred since 2010. However, there are converse results for  
12 certain regions. For example, Cheng *et al.* (2017) and Zhi *et al.* (2017) conducted a village energy survey for  
13 the rural areas in Hebei Province and revealed a huge amount of missing rural raw coal for winter heating. For  
14 Beijing and Baoding, rural emissions from raw coal in winter were higher than those from the industrial and  
15 urban household sectors in the two cities in 2013. Considering the living habit of residents in northern China,  
16 this may imply an extreme underestimation of rural household coal consumptions by the China Energy  
17 Statistical Yearbooks. Additionally, multisatellite data (Ozone Monitoring Instrument-OMI, the SCanning  
18 Imaging Absorption spectroMeter for Atmospheric CartograpHY-SCIAMACHY) revealed increasing SO<sub>2</sub>  
19 emissions due to energy industry expansion in northwestern China (the central government of the People’s  
20 Republic of China, 2012, 2014), especially new power plant installations in Xinjiang and Shaanxi, e.g., in  
21 Shen *et al.* (2016) and Koukouli *et al.* (2016). Eight different regions are illustrated to address this issue.  
22 Northern China is divided into two regions, the North China Plain (NCP) and Northeastern China (NEC), as  
23 the North China Plain is more emissions-intensive and may experience more strict control strategies than those

1 in Northeastern China during winter haze periods. Northwestern China is also divided into two regions,  
2 including the EGT (the Energy Golden Triangle) and XJ (Xinjiang). Southern China is divided into four  
3 regions according to its geographic characteristics, including the SB (Sichuan Basin), CC (Central China),  
4 YRD (Yangtze River Delta), and PRD (Pearl River Delta). The spatial distributions of the SO<sub>2</sub> emissions in  
5 the 8 regions are also illustrated in Fig. 2.

6 In terms of the temporal allocation, we applied predefined functions for the diurnal variations of the priori  
7 SO<sub>2</sub> emissions, but the hourly factors are the same for all the sectors and all the grids, which is not optimal.  
8 Actually, different sectors/regions may have different hourly emissions factors. For example, the  
9 transportation sector may emit peak emissions during rush hours, and the industry sector may emit emissions  
10 during the production period. Thus, it is not optimal to use the same hourly emissions factors for all sectors.  
11 For regions in different time zones, different hourly emissions factors are also expected. The diurnal variability  
12 is not publicly released and is highly uncertain, which brings large uncertainty in the simulations. We also  
13 want to investigate whether the DA system can capture the diurnal variations of SO<sub>2</sub> emissions by using the  
14 hourly surface SO<sub>2</sub> concentrations as constraints.

### 15 2.3 GSI 3D-var DA system

16 Building upon the GSI 3D-var DA system used in Chen *et al.* (2018), we extended the system capability  
17 of assimilating surface SO<sub>2</sub> observations. The algorithm and methodology for the aerosol DA are described in  
18 Chen *et al.* (2018). Here, only the differences implemented for the SO<sub>2</sub> DA are addressed.

19 The SO<sub>2</sub> observation operator is rather simple, written as  $\Pi m = \rho_c M_{SO_2}$ . The unit of the model-  
20 simulated  $M_{SO_2}$  is ppm; thus, multiplication by the unit conversion  $\rho_c$  was required to convert the units  
21 to  $\mu\text{g m}^{-3}$  for consistency with the observations. The observation errors are calculated similarly to the process  
22 in Chen *et al.* (2018). In the data quality control process, SO<sub>2</sub> observational values larger than  $650 \mu\text{g m}^{-3}$  or  
23 observations leading to innovations/deviations (observations minus the model-simulated observations  
24 determined from the first-guess fields) exceeding  $100 \mu\text{g m}^{-3}$  were not used. The static BECs (background

error covariance) were computed via the “National Meteorological Center (NMC)” method (Parrish and Derber, 1992) by taking the differences of the 24-hr and 12-hr WRF-Chem forecasts valid at the same time for 60 pairs valid at either 00UTC or 12UTC over January 2015. The standard deviations over the whole domain are shown in supplemental Fig. S1.

## 2.4 WRF-Chem/EnKF DA system

The WRF-Chem/EnKF assimilation system framework (Fig. 1) was used. Similar to other ensemble DA configurations in WRF-Chem, such as WRF-Chem/Dart (Mizzi *et al.*, 2016), WRF-Chem is used to propagate the initial ensemble forward in time. The EnSRF is used to assimilate the observations and update the meteorological conditions, chemical initial conditions and/or emissions. The differences relative to WRF-Chem/Dart are mainly in the assimilation engine (the ensemble adjustment Kalman filter is used in WRF-Chem/Dart, while the ensemble square root filter is used in our study), the structure of the state variables (meteorological and chemical initial/conditions are used in WRF-Chem/Dart, while chemical initial condition/emissions are used in our study), the cycling procedures, etc. The WRF-Chem/EnKF assimilation system framework (Fig. 1) is very similar to that of Peng *et al.* (2017). Peng *et al.* (2017) focused on the joint analysis of both the initial conditions and emissions of PM<sub>2.5</sub> and addressed the forecasting skill improvement from using the EnKF system. Here, we focus on the estimation of SO<sub>2</sub> emissions, aiming to investigate the system capability of reflecting the spatial-temporal emissions changes using observational data as constraints. In addition, instead of setting the emissions scaling factors as control variables and adjusting the emissions by timing the scaling factors, we attempted to set emissions directly as control variables, which allowed adjustments by adding absolute emission values. Through this method, the detection of new emissions sources would become more flexible. As in the previous approach, the emissions scaling factors were extremely large when a new emissions source (e.g., a new power plant) occurred in an originally “clean” model grid (prior emissions close to zero), with the scaling factor being so large that it might be treated as “unrealistic” and be

1 filtered out in the system. The direct analysis of emissions is expected to be more appropriate for this case.

2 The Ensemble Square Root Filter (EnSRF, Whitaker and Hamill 2002) algorithm is very similar to that  
3 in Peng *et al.* (2017), except for some differences, such as the state variables (changed from aerosols to SO<sub>2</sub>  
4 concentrations and emissions) and the inflation factor. In addition, the forecast model for emissions is also  
5 different from that in Peng *et al.* (2017). More details on the differences from Peng *et al.* (2017) are described  
6 below.

#### 7 2.4.1 State variables

8 A similar ensemble square root filter is used in this study to update a 50-member ensemble to that used  
9 in Peng *et al.* (2017). We also applied the state augmentation method (e.g., Miyazaki *et al.*, 2012). The only  
10 difference is that model parameter (SO<sub>2</sub> emissions) is directly estimated by including it as part of the state  
11 vector together with the model forecast variable (SO<sub>2</sub> concentration). The background ensemble is defined as  
12 below:

$$13 \quad \mathbf{x}_i^b = \begin{bmatrix} C_i^b \\ E_i^b \end{bmatrix} \quad (1)$$

14 in which  $\mathbf{x}_i^b$  is the  $i^{th}$  member's background vector, consisting of model-simulated SO<sub>2</sub> concentrations  $C_i^b$   
15 and the SO<sub>2</sub> emissions  $E_i^b$ . For a grid with zero emissions in the priori emissions, the absolute emissions  
16 values would be added into the DA analysis to reflect the new emissions sources. Negative emissions  
17 estimates were not permitted in the system due to mandatory setting of the minimum values (a small positive  
18 value close to zero).

19 In Miyazaki *et al.* (2012), the state augmentation method was used to estimate NO<sub>x</sub> emissions using  
20 satellite observations (Ozone Monitoring Instrument-OMI retrieved NO<sub>2</sub> column) as constraints with a local  
21 ensemble transform Kalman filter (LETKF). The employment of combined state vectors (both NO<sub>2</sub>  
22 concentrations and NO<sub>x</sub> emissions) allowed indirect relationships between NO<sub>2</sub> concentrations and NO<sub>x</sub>

emissions, causing complex chemical and transport processes to be considered through the use of the background error covariance, which was produced by the ensemble Chemical Transport Model-CTM forecast. Building upon Miyazaki *et al.* (2012), we used a similar approach to address the indirect relationships between SO<sub>2</sub> concentrations and SO<sub>2</sub> emissions caused by chemical and transport processes. The chemical processes include several paths of SO<sub>2</sub> oxidation, such as gas-phase reactions with the hydroxyl radical (OH), aqueous-phase reactions with O<sub>3</sub> or hydrogen peroxide (H<sub>2</sub>O<sub>2</sub>), and heterogeneous reactions in high-RH environments (e.g., Li *et al.*, 2011; Wang *et al.*, 2012).

To reduce spurious correlations due to sampling errors, covariance localization was applied following Schwartz *et al.* (2014) and Peng *et al.* (2017). EnSRF analysis increments were forced to zero 1280 km from an observation in the horizontal direction and to 1 scale height (in log pressure coordinates) in the vertical direction using a Gaspari and Cohn (1999) polynomial piecewise function.

#### 2.4.2 Inflation factor in the EnSRF

During the analysis process, the analyzed emissions of different members converge gradually, and the background emissions (calculated according to Eq. 4) of different members in the DA cycling become similar, thus leading to a small ensemble spread (variance). To maintain the spread level, an artificial inflation process (the original perturbations time the inflation factor larger than 1) was added to increase the perturbations. Further, multiplicative inflation was applied to posterior (after assimilation) perturbations concerning the ensemble mean analyses, following Whitaker and Hamill (2012)’s “relaxing-to-prior spread” approach with an inflation parameter  $\alpha$ .

$$\delta x_a^i \leftarrow \delta x_a^i \left( \alpha \frac{\sigma_b - \sigma_a}{\sigma_a} + 1 \right) \quad (2)$$

In this equation,  $\delta x_a^i$  is the  $i^{th}$  member’s analyzed perturbation concerning the mean analysis ( $x_a^i - \bar{x}$ ),  $\alpha$  is the inflation factor, and  $\sigma_b$  and  $\sigma_a$  are the prior (before assimilation) and posterior standard deviations at each model grid point, respectively. Using the definition of the standard deviation, Eq. (2) can be expressed

1 as

$$\sigma_a \leftarrow \alpha \sigma_b + (1 - \alpha) \sigma_a \quad (3)$$

3 Assimilating observations reduces the ensemble spread; thus, without inflation,  $\sigma_a < \sigma_b$ . From Eq. (3),  
4 if  $\alpha > 1$ , the inflated posterior spread is forced to be larger than the prior spread ( $\sigma_b$ ). Conversely, for  
5  $\alpha < 1$ , the inflated posterior spread must be less than  $\sigma_b$ . As no prior or additive inflation was employed,  
6  $\alpha > 1$  was necessary to maintain the ensemble spread, and we used the inflation factor of  $\alpha = 1.12$ .

### 7 2.4.3 Forecast models for emissions

8 The forecast model is important, as it propagates observation information, inflates the analysis spread  
9 and determines the quality of the first guess. In Peng *et al.* (2017), a smoothing operator served as the forecast  
10 model for the emissions scaling factors. In this study, direct emissions instead of scaling factors were treated  
11 as part of the state variables, thus producing a similar method for the forecasting approach to that used in  
12 Miyazaki *et al.* (2012). A linearized forecast model (M) provides a first guess of the state vector for data  
13 assimilation based on the background error covariance from the previous analysis time  $t_n$  to the new analysis  
14 time  $t_{n+1}$ ,

$$P_{(t_{n+1})}^b = 0.75 \times MP_{(t_n)}^a M^T + 0.25 \times P_{(t_0)}^b, \quad (4)$$

16 in which a persistent forecast model (M=I) is used for SO<sub>2</sub> emissions, and the estimated emissions are used in  
17 the next step of ensemble forecasting. To prevent parameter covariance magnitude reduction, we added the  
18 initial prior ensemble as random noise. The forecast model for direct emissions is weighted 75% toward the  
19 results from the previous analysis time and 25% toward the static initial prior ensemble. The initial prior  
20 ensemble of SO<sub>2</sub> emissions for the first EnSRF analysis was constructed from the priori emissions by taking  
21 Gaussian random draws from a standard Gaussian distribution and varied for each ensemble member as in  
22 Peng *et al.* (2017). This approach incorporates the useful information from the previous time step and the  
23 priori emissions, which propagates the observation information from one step to the next while still keeping

1 some of the characteristics of the priori features.

#### 2 **2.4.4 The initialization and DA cycling procedure**

3 The WRF-Chem/EnKF assimilation system framework is shown in Fig. 1, and the workflow is briefly  
4 introduced here. The initialization and spin-up procedures of the 50-member ensemble were conducted using  
5 72-hr ensemble forecasts ahead of the focused period through the same method used in Peng *et al.* (2017,  
6 2018). For the 50 members, the lateral boundary conditions and initial condition of meteorology from GFS  
7 were perturbed by adding Gaussian random noise with a zero mean and statistic background error covariances  
8 to the meteorological parameters. The emissions of the 50 members were generated by adding random noise  
9 to the priori emissions, similar to the method in Schwartz *et al.* (2014) and Peng *et al.* (2017). After the 72-hr  
10 forecasts, 50-member ensemble SO<sub>2</sub> forecasts were generated, which were used as part of the background ( $C_i^b$   
11 in Eq. 1) in the first EMIS\_DA cycle. The other part of the background ( $E_i^b$  in Eq. 1) was the perturbed  
12 emissions of the last time step. In the EnSRF assimilation step, the state variables, including both the emissions  
13 for the last hour and the concentrations at the current hour, were updated. In the new 1-hr cycle, the background  
14 field of emissions is forecast through Eq. (4), and the background concentration is from the WRF-Chem 1-hr  
15 forecast using the updated chemical fields of the previous assimilation cycle as the ICs. With hourly cycling,  
16 the hourly analyzed emissions were obtained.

#### 18 **2.5 Observations**

19 Hourly surface SO<sub>2</sub> concentrations for January 2015 and 2016 were obtained from the China National  
20 Environmental Monitoring Center (CNEMC). There are approximately 1600+ sites in our modeling domain  
21 (black dots in Fig. 2). As the 1600+ monitoring sites fall into 531 model grids, observations within the same  
22 grid are averaged (by latitude and longitude) for the purpose of statistics and verification. The observation  
23 sites span mostly northern, central and eastern China and are relatively sparse in western China. To ensure



data quality before use in the DA, SO<sub>2</sub> observational values larger than 650 µg m<sup>-3</sup> were deemed unrealistic and not assimilated in the GSI 3D-var or the EnKF DA system.

## 2.6 Experimental design

To qualitatively evaluate the deficiencies of the priori SO<sub>2</sub> emissions, generate updated emissions for 2015 and 2016, and evaluate the improvements from the DA approach, five sets of experiments were conducted. The corresponding comparisons and purposes are listed in Table 2. The simulated periods were January of 2015 and 2016. The meteorological initial condition (IC) and boundary condition (BC) were updated from GFS analysis data every 6 hr (for NO\_DA) or 1 hr (for CONC\_DA and EMIS\_DA) to prevent meteorology simulation drifting. The same WRF-Chem configurations (Table 1) were used in all the experiments.

In the NO\_DA experiment, a new WRF-Chem forecast was initialized every 6 hr starting at 00UTC, 20 December of the previous year to spin up the chemistry fields and was run through 23UTC, 31 January. The chemistry fields were simply carried over from cycle to cycle. The 2010-MEIC priori emissions were used, assuming the same emissions as in 2010. For CONC\_DA, the hourly surface observations were assimilated by GSI 3D-var, and the SO<sub>2</sub> concentrations were updated every hour starting from 00UTC, 1 January. The background of the first time step is from the NO\_DA simulation, and those of the later time steps are all from the 1-hr WRF-Chem forecast using the updated chemical fields of the previous assimilation cycle as the ICs. As the concentrations from CONC\_DA is very close to the observations, the concentration differences between CONC\_DA and NO\_DA possibly indicated a model deficiency in reproducing the reality, which was mainly from the emissions changes from 2010 to 2015-2016. The assumption is that the GFS 6-hr analysis data provide good meteorological IC/BC values and that the model accurately simulated the meteorology conditions; thus, the emissions were the major deficiency in the model.

1       The EMIS\_DA experiment with continuous hourly cycling of the WRF-Chem/EnKF was performed for  
2       January of 2015 and 2016. The initialization and spin-up procedures of the 50-member ensemble were  
3       conducted starting from 00UTC, 29 December of the previous year to 00UTC, 1 January of the next year.  
4       Then, the EMIS\_DA cycle started at 00UTC, 1 January. Following the procedure in Fig. 1, the EMIS\_DA  
5       experiment started with conducting EnSRF analysis and generated both the updated SO<sub>2</sub> concentration fields  
6       for the current time step and the updated analyzed SO<sub>2</sub> emissions for the previous time step. In this hourly  
7       cycling approach, 1-hour WRF-Chem/EnKF cycling was conducted for January of 2015 and 2016, and hourly  
8       analyzed SO<sub>2</sub> emissions were then obtained. We compared the 2015 emissions from EMIS\_DA versus the  
9       2010 priori emissions, as the emissions differences between the 2015 analyzed emissions and the 2010 priori  
10      emissions not only reflected the changes from 2010 to 2015 but also included the deficiencies in the 2010  
11      priori emission. We also compared the updated emissions between 2015 and 2016, as the differences between  
12      the 2016 analyzed emissions and the 2015 analyzed emissions reflected the pure emissions changes from 2015  
13      to 2016, since the deficiencies of the 2010 priori emissions were offset in the subtraction. The emissions  
14      control policies are discussed to investigate whether the emissions changes are reasonable.

15      To investigate the impact of using analyzed emissions from the EnKF DA system, two forecast  
16      experiments (NO\_DA\_forecast and EMIS\_DA\_forecast) were conducted for the same period. Twenty-four-  
17      hour forecasts were performed at 00UTC of each day from 1-31 January for 2015 and 2016. The original priori  
18      emissions and the updated analyzed emissions were used, respectively, in the NO\_DA\_forecast and  
19      EMIS\_DA\_forecast experiments. The chemistry initial conditions for each forecast in the two forecast  
20      experiments were from the 1-hour cycling GSI 3D-var (COND\_DA) experiment. The meteorological IC and  
21      BC were all from GFS analysis and forecast data. The concentration differences between the two sets of 24-  
22      hour forecasts reflects the effects of the updated emissions.

### 3. Changes in ambient concentrations

This section presents the simulated SO<sub>2</sub> concentration results of NO\_DA and CONC\_DA. As shown in Chen *et al.* (2018), 1-hr cycling of the GSI 3D-var DA system produces reliable PM<sub>2.5</sub> reanalysis fields. As the methodology and procedure are the same for SO<sub>2</sub>, we can expect that the improvement of SO<sub>2</sub> assimilation will be as good as that of PM<sub>2.5</sub>, as evidenced by the basic statistics including the mean bias (MEAN/BIAS), standard deviation (STDV), and root-mean-square errors (RMSE) between NO\_DA/CONC\_DA and observations shown in Supplemental Fig. S2. Therefore, the purpose of this section is not to verify the performance of the GSI 3D-var assimilation experiment but to investigate the differences between NO\_DA and CONC\_DA. As NO\_DA is the simulation with the 2010 emission inventory, while the results of CONC\_DA can serve as gridded reanalysis data from real observations, the differences between the two runs actually reflect the possible deficiencies in the model. As the meteorology data are from the 6-hr GFS reanalysis data, we assume that most of the deficiencies come from using the 2010 priori emissions for the years 2015 and 2016 in the model, and the comparisons also provide an idea of the changing trends of the emissions.

#### 3.1 Spatial distribution

Figure 3 shows the observed and modeled monthly average of surface SO<sub>2</sub> for January in 2015 and 2016. The observations show great differences between northern and southern China, reflecting the dominating role of heating-related emissions in northern China during the winter season. The high values in northern China also show localized characteristics (no smooth transitions from the high-value region to the surroundings) that reveal the localization of SO<sub>2</sub> emissions and transport. The NO\_DA experiment significantly overestimates the surface SO<sub>2</sub> in the Sichuan Basin and Central China but underestimates it at several locations in northern China and Xinjiang. After GSI 3D-var hourly cycling of the DA, the CONC\_DA experiment results are very close to observations because they corrected most of the biases in NO\_DA except for the very high values at

1 some of the “hot spots” in northern China. The reason why the improvements at those locations are not  
2 significant may be the data filtering process, in which SO<sub>2</sub> data with either the observed values larger than  
3 650 µg m<sup>-3</sup> or innovations/deviations (observations minus the model-simulated values determined from the  
4 first-guess fields) exceeding 100 µg m<sup>-3</sup> were rejected. The differences between CONC\_DA and NO\_DA more  
5 clearly revealed the inhomogeneous emissions changes in different regions. For 2015, a great SO<sub>2</sub> decrease  
6 from NO\_DA to CONC\_DA in most of the eastern and southern regions but increases in Northeastern China,  
7 the Energy Golden Triangle and Xinjiang are found, indicating that the 2010 January priori emissions should  
8 be adjusted accordingly (following decreasing/increasing trends respectively) to reflect the 2015 January  
9 status. The negative discrepancies in the eastern and southern regions are even larger for 2016, indicating  
10 continuous emissions decreases there.

11 To further investigate the deficiencies of the priori emissions, the spatial distributions of the statistics  
12 (MEAN BIAS, RMSE and CORR) at each observational site (with more than 2/3 valid data in the month) in  
13 January of 2015 and 2016 for the two experiments are shown in Fig. 4. We start from the 2015 statistics and  
14 then address the differences relative to 2016. In NO\_DA, consistent with Fig. 3, the surface SO<sub>2</sub> in southern  
15 China (the Sichuan Basin, Central China, the Pearl River Delta and the Yangtze River Delta) is generally  
16 overestimated by 20-50 µg m<sup>-3</sup>, but it is underestimated in Northeastern China and the Energy Golden Triangle.  
17 The BIAS also showed localized characteristics with positive biases in mega-cities (e.g., Beijing), along with  
18 negative biases in the surroundings, indicating overestimated/underestimated emissions, respectively. There  
19 are also high RMSEs in Northeastern China, Northern China Plain and the Energy Golden Triangle, indicating  
20 a wide spread of differences between observational data and NO\_DA simulations, which may also indicate a  
21 model deficiency in reproducing strong temporal fluctuations (with the same daily emissions and fixed hourly  
22 factors as in the priori emissions). The poor correlations (less than 0.5) at most of the sites also indicate the  
23 assumption. From year to year, the biases in 2016 are even more prominent. With GSI 3D-var hourly cycling,

1 the BIAS, RMSE and CORR are greatly improved, as expected, while the improvements in northern China  
2 are smaller than those in southern China.

### 3 4 **3.2 Changes from 2015 to 2016**

5 The differences between the January values of the two years (2015-2016) are shown in Fig. 5.  
6 Observations (Fig. 5a) mostly show decreases from 2015 to 2016 for most sites, especially in the Northern  
7 China Plain and southern China. In the NO\_DA experiment (with the same emissions and different  
8 meteorology), some decreases are shown that reflect the meteorology condition differences between the two  
9 years, but the observed significant decreases in the Northern China Plain and southern China are not captured.  
10 CONC\_DA (Fig. 5b) did reproduce the large decreases in the Northern China Plain and southern China from  
11 2015 to 2016. From the difference between Fig. 5b and 5c, it can be assumed that factors other than  
12 meteorology (e.g., emissions control measures) did play important roles in causing the decreasing changes.  
13 CONC\_DA failed to reproduce the large positive changes at 3 locations in the Energy Golden Triangle region,  
14 as CONC\_DA failed to reproduce the high SO<sub>2</sub> concentrations in both years due to the data filtering processes.

## 15 **4. Changes in emissions**

16 Before the emissions trend analysis, the ensemble performance was evaluated. For comparison with priori  
17 emissions, the analyzed hourly emissions were averaged monthly. Analysis of the total amounts and spatial  
18 changes were conducted for the aforementioned 8 regions. We focus on the emissions trends for two periods,  
19 2010-2015 and 2015-2016. Additionally, the hourly factors (diurnal cycle) of the optimized emissions were  
20 given to reflect the values of the hourly DA.

### 21 22 **4.1 Ensemble performance**

23 In a well-calibrated system, when compared to the observations, the prior ensemble mean root mean  
24 square error (RMSE) would equal the prior “total spread”, defined as the square root of the sum of the

1 observation error variance and the ensemble variance of the simulated observations (Houtekamer *et al.*, 2005).  
2 The time series of the hourly prior ensemble mean RMSE and the total spread of surface SO<sub>2</sub> in the 8 regions  
3 are shown in Figure 6. The time series of the two months (Jan. 2015 and Jan. 2016) are given separately.  
4 Typically, the statistics at a single site for a certain period reflect the model biases and variances of errors at  
5 that site for the whole period. Differently, herein, the statistics for the 8 regions were determined for all sites  
6 within the region at a 1-hr frequency, which means that the statistics actually reflect the biases and error  
7 variances of the model simulations for those sites at every hour. As the emissions and meteorology conditions  
8 could be very different at sites in the same region, the RMSE for that region could be large. Due to the spatial-  
9 temporal inhomogeneity of emissions and meteorological conditions in different regions, the model shows  
10 different performances in terms of the differences in the RMSE. The “total-spread” reflects the ensemble  
11 variances of the model-simulated values.

12 The magnitudes of the total spread and the RMSE are influenced by the diurnal cycle and the pollution  
13 events (driven by meteorology patterns and emissions). As expected, all of the total spreads in the 8 regions  
14 are smaller than the RMSE for almost the whole period, except those for the first few days in 2015. Because  
15 in the spin-up procedure, the lateral boundary and initial conditions of meteorology were also perturbed in  
16 addition to emissions perturbation, larger spreads were obtained in the first DA cycle, which may have  
17 remained for a short period. For all other periods without meteorology perturbations, insufficient spreads of  
18 SO<sub>2</sub> ensemble forecasts were shown, with the effects in the northern and western regions (North China Plain,  
19 Northeastern China, the Energy Golden Triangle, Xinjiang) being worse than those in southern regions (the  
20 Sichuan Basin, Central China, the Yangtze River Delta, and the Pearl River Delta), as the prior ensemble mean  
21 RMSE values in the northern regions were much larger, but the total spreads were fairly constant. For the  
22 northern regions, the total spread (Fig. 6) was relatively small compared to the RMSE. This might indicate  
23 that the analyzed emissions converged gradually and that the background emissions (calculated according to

Eq. 4) of different members in the DA cycling were similar, thus leading to the small spread. As the spread is small, some observations might be rejected in the DA outlier check, which may impact the DA performance.

The distinction of the comparisons among different regions (the North China Plain vs. the Yangtze River Delta/Pearl River Delta) indicated the deficiencies of the perturbation procedure in the DA system when applied to northern regions. Further investigations should be conducted to generate larger spreads for northern regions in future studies.

## 4.2 Analyzed 2015 and 2016 emissions

The optimized SO<sub>2</sub> emissions obtained from the assimilations for Jan. of 2015 and 2016 are shown in Fig. 7. To address the changes from 2010 to 2015 and those from 2015 to 2016, the differences and ratios between the two groups (2010 vs. 2015 and 2015 vs. 2016) are given. For the comparison of 2015 analyzed emissions with 2010 priori emissions, as real observations were used to constrain the 2015 emissions, the differences between the two sets of emissions actually reflect the adjustments based on the 2010 priori emissions, which are needed to better capture observations; thus, the comparison not only reflects the changing trends from 2010 to 2015 but may also indicate the deficiencies of the 2010 priori emissions. It should be noted that the two aspects are mixed in interpreting the results. While the comparison of 2015 analyzed emissions with 2016 analyzed emissions is more straightforward, as they are both produced using observation constraints, the differences between the two reflect the annual changes between the two years, and the impacts from priori emissions deficiencies are removed in the subtraction.

Compared to the 2010 priori emissions, the analyzed emissions for 2015 show different spatial changes (northern, western, southern China). Large emissions decreases in southern China (the Sichuan Basin, Central China, the Yangtze River Delta and the Pearl River Delta) are shown, but there are also some small emissions increases in scattered regions. These increases are relatively small in absolute value (shown in a light-yellow color in Fig. 7c), but the 2015/2010 ratios can reach large numbers (shown in orange to red colors in Fig. 7d),

1 as the priori emissions in those regions are very small (Fig. 2); thus, **minor changes** lead to large ratios. For  
2 northern China (North China Plain, Northeastern China), the change pattern is somewhat opposite. Emissions  
3 increases are shown for most of the regions, with decreases only at scattered points. Large 2015/2010  
4 increasing ratios are also shown in western China (Xinjiang and The Energy Golden Triangle), while the priori  
5 emissions are very sparse in those two region; thus, the emissions increases are more significant, which may  
6 indicate new emissions sources. For the changes from 2015 to 2016, the pattern is rather homogenous across  
7 the whole domain, with decreases in almost all regions.

### 8 9 **4.3 Changes in different regions**

10 To further illustrate the changes in different regions, the details of 8 regions are given in Fig. 8 (2015 vs.  
11 2010) and Fig. 9 (2016 vs. 2015). Similar to Fig. 7, the emissions changes in terms of absolute values (left)  
12 and ratios (right) are given for each region. To better understand the geographic changes, the center locations  
13 of some large cities (capital cities of provinces and municipal centers at the city level) in those regions are  
14 labeled. According to Fig. 7, the change patterns are different in northern, western and southern China for  
15 2015; thus, discussions are given based on this classification. We start from the comparison of the 2015  
16 analyzed emissions with the 2010 priori emissions, as there is a five-year time lag between the two sets of  
17 emissions, along with large uncertainties, and thus, large changes are expected.

18 It is interesting to see that for northern China (North China Plain and Northeastern China), the most  
19 significant decreases occur in or around large cities (city center locations are labeled as black dots). The  
20 phenomenon is very prominent in the North China Plain, as we can see some “cold” spots (grids with cold  
21 colors) in Fig. 8a, which are either overlapped with city center locations (Beijing, Tianjin, Xingtai, Handan in  
22 Beijing-Tianjin-Hebei Region, and Dongying, Jinan, Zibo, Jining in Shandong Province) or adjacent to the  
23 center locations (Shijiazhuang, Linyi, Zaozhuang). As the center locations are represented as  
24 latitudes/longitudes that do not cover entire city areas, there might be some shifting produced from interpreting



1 the results when the city areas are too large (e.g., Shijiazhuang, Changchun, Shenyang) and have been split  
2 into two or more grids in the model. While the results still indicate that from 2010 to 2015, the emissions in  
3 these larger cities decreased due to the strict control strategies (factory migration from urban regions to remote  
4 regions, desulfurized equipment in factories/vehicles, low-sulfur energy, etc.), there are some emissions  
5 increases in the suburban and rural regions surrounding these larger cities, either due to emissions migration  
6 from urban regions or new emissions sources added due to urbanization development. The results might also  
7 indicate that the control strategies were executed at different levels in urban (more strict) and suburban-rural  
8 regions during 2010 to 2015. In Northeastern China, significant “cold spots” also occur in the three larger  
9 cities, including Ha’erbing, Changchun, and Shenyang, but increases mostly occur in other areas, indicating a  
10 similar trend to that in the North China Plain, in which large emissions decreases occurred in bigger cities and  
11 mild emissions increases occurred in suburban-to-rural regions from 2010 to 2015. In addition to the possible  
12 aforementioned reasons accounting for the different changes of urban and suburban-rural regions from 2010  
13 to 2015, it should be noted that the month of January is during the heating season for the North China Plain  
14 and Northeastern China, and the large areas of emission increase might also indicate some heating emissions  
15 (from energy that has not been well statistically recorded, e.g., crop combustion and residential coal  
16 combustion) that are missing from the priori emissions.

17 In western China, where the emissions intensities are not so high and the emissions sources are relatively  
18 sparse, the emissions changing trends from 2010 to 2015 are more obvious and are more meaningful for  
19 distinguishing new emissions sources/regions. As some studies revealed increasing SO<sub>2</sub> emissions due to  
20 energy industry expansion and relocation in northwestern China from OMI measurements (Ling *et al.*, 2017),  
21 our 2015 analyzed emissions also show large emissions increases in the whole area of the Energy Golden  
22 Triangle and Xinjiang, except for in very few larger cities (Yinchuan, Wuhai, Lanzhou; Kelamayi). The  
23 emissions in other areas of the Energy Golden Triangle and Xinjiang are almost all increasing from 2010 to

2015. Especially for Xinjiang, the increases of emissions are all attributed to the rapidly developing cities, including U’rumqi, A’kesu, Ku’erle, Yecheng, Manasi, Tacheng, Huocheng, Bachu, A’tushi, Shanshan, Shache, etc. Koukouli *et al.* (2016) and Ling *et al.* (2017) used multisatellite data to investigate the SO<sub>2</sub> load changes from 2004-2014/2005-2015 and identified locations with increases (including U’rumqi in Xinjiang and cities in northwestern China). They reported that “These belong to provinces with emerging economies which are in haste to install power plants and are possibly viewed leniently by the authorities, in favor of growth.” Our findings are also consistent with those of these two studies.

In southern China, decreasing changes are shown for large areas, especially in the Yangtze River Delta and Pearl River Delta, in which decreasing trends in larger cities are clearly shown, e.g., in Shanghai, Nanjing, and Hangzhou in the Yangtze River Delta and in Guangzhou, Shenzhen and Foshan in the Pearl River Delta, with relatively larger decreasing ratios in more well-developed cities. In the Sichuan Basin and Central China, the decreases in larger cities are also significant, and different extents are achieved in cities of different levels. For Chengdu, Chongqing, Zunyi, Guiyang, and Yunyang in the Sichuan Basin and Wuhan and Changsha in Central China, approximately 40-50% reductions are shown from 2010 to 2015. For other larger cities (municipal centers of cities), 20-30% reductions are shown.

As previously mentioned, the comparisons between the 2015 and 2016 analyzed emissions (Fig. 9) are more straightforward and reflect the necessary emissions changes from 2015 to 2016, since the uncertainties in the priori emissions are subtracted. As expected, decreasing trends are shown for almost all the labeled cities, indicating the continuing strict execution of control strategies. However, there are still some grids with emissions increases (approximately 10-30%) in surrounding regions, especially in the North China Plain, which might reflect the emissions increase from January 2015 to January 2016. As shown in Fig. 10 of Chen *et al.* (2018), the temperature in January 2016 was much colder than that in 2015, and the emissions increases at those points may indicate heating-related emissions. Compared with Fig. 8 (2015 vs. 2010), the changes

1 from 2015 to 2016 (both increases and decreases) in Fig. 9 are much milder.

2 The regional averages of the 2015 and 2016 January emissions are summarized in Table 3. In northern  
3 China (North China Plain, Northeastern China) and western China (the Energy Golden Triangle and Xinjiang),  
4 the 2015 analyzed emissions are all larger than the 2010 prior emissions. The increase percentages are 12.7%,  
5 49.4%, 25.6% and 72% for the North China Plain, Northeastern China, the Energy Golden Triangle and  
6 Xinjiang, respectively, indicating an increasing trend from 2010 January to 2015 January, due either to  
7 emissions increases in reality (possibly in the Energy Golden Triangle and Xinjiang) or uncertainties in the  
8 2010 priori emissions (possibly in the North China Plain and Northeastern China). The largest increase  
9 occurred in Xinjiang, reaching 72%, which is consistent with the previous findings of newly added emissions  
10 sources in that region. In southern China, the 2015 analyzed emissions are all smaller, and the decreasing  
11 ratios are -10.5%, -9.9%, -13.8% and -22.9% for the Sichuan Basin, Central China, the Yangtze River Delta  
12 and the Pearl River Delta, respectively. For the changes from 2015 to 2016, decreasing trends are shown for  
13 all regions, with the ratios ranging from -5.3% to -16.1%.

14 In the recent study by Zheng *et al.* (2018), the 2010-2017 trends of anthropogenic emissions in China  
15 were investigated. According to the “bottom-up” approach, the annual total amounts of SO<sub>2</sub> emissions were  
16 calculated to be 27.8, 16.9 and 13.4 Tg for the years 2010, 2015 and 2016, respectively. The 2010 to 2015-  
17 2016 decreases were mostly attributed to the power and industry sectors due to the strict pollution control  
18 measures implemented for these two sectors. The sectoral distribution of emissions changed significantly  
19 during the recent years, and emissions other than those from power and industry have occupied larger portions,  
20 especially for the residential sector, as the current control policies have limited effects on reducing emissions  
21 from the residential sector. According to Zheng *et al.* (2018), the national total SO<sub>2</sub> emissions decreased by  
22 20.8% from 2015 to 2016. Our derived changes ratios for the month of January in most of the regions (NEC,  
23 XJ, SB, CC, PRD) are comparable (13.9%, 16.1%, 12.4%, 15.5%, 12.6%, respectively, see Table 3), but the

change ratios for NCP, ETR and YRD are relatively smaller. As discussed in Zheng *et al.* (2018), “bottom-up” emissions estimates are uncertain due to incomplete knowledge of the underlying data, and uncertainties are larger when emissions are contributed by scattered emissions sources. Especially for the residential sector, the effectiveness of the measures (e.g., phasing out of small high-emissions stoves, banning of coal heating) is difficult to validate due to the lack of inspections; thus, higher uncertainties may arise for regions in which residential emissions are relatively important.

#### 4.4 Hourly factors

As hourly observations were used to constrain the emissions, analyzed emissions at an hourly frequency were obtained, which provided us an opportunity to investigate the hourly emissions factors from observations. To retrieve the hourly factors, the emissions during each hour (24 hr) are averaged based on the EMIS\_DA experiment for the whole period (Jan. 2-31). The retrieved hourly factors for 2015 and 2016 and the 2010 priori emissions are shown in Fig. 10. The priori hourly factors are given arbitrarily, with two peaks during the day at 01UTC (09 Beijing-BJ time) and 09UTC (17 BJ time) to reflect the emissions during rush hours. The retrieved hourly factors in northern and western China showed two peaks at approximately 02TC (10 BJ time) and 12UTC (20 BJ time), but the second peak is obscure in southern regions. In addition, the second peak of the hourly factors in northern and western regions is are much lower than the first, which was different from the predefined curve. In Xinjiang, the peaks occurred later than in the other regions, indicating that the time zone differences caused a different energy consumption/emissions pattern. It should be noted that the hourly factors were derived from the analyzed emissions constrained from ambient concentration observations; thus, the response times from emissions to ambient concentrations were simplified in the assimilation system. Although the background emissions contain the information from the previous cycles, and thus may help to pass the response information, there might still be some time-lag in the retrieved hourly factors, which should be further verified.

## 1    **5. Forecast improvements**

2            As there are large uncertainties in the “bottom-up” 2010 priori emission inventory and in the assimilation  
3    process itself, it is difficult to verify the accuracy of the 2015 and 2016 January analyzed emissions. The  
4    “bottom-up” emission inventory for the two years is not yet available for comparison. Thus, two sets of  
5    forecast experiments using the priori emissions and the analyzed emissions were conducted (NO\_DA\_forecast  
6    vs. EMIS\_DA\_forecast, see details in section 2.5). The forecast differences between the two experiments can  
7    reflect, to some extent, the performance/improvement of the analyzed emissions. To show the differences  
8    spatially, the statistics at single observational sites in the two forecast experiments are given and compared. In  
9    addition, the improvement from the hourly forecast is more meaningful in showing the system capability of  
10   hourly emission optimization. Thus, the time series of the regional means in 8 regions are also given to show  
11   the performance temporally.

### 12 13    **5.1 Changes of spatial statistics**

14            Figure 11 and 12 show the performances of the NO\_DA\_forecast and EMIS\_DA\_forecast experiments  
15   for January of 2015 and 2016, respectively. Statistics, including the **BIAS** (bias, equal to the difference  
16   between the modeled value and the observational value, representing the overall model tendency), RMSE  
17   (root mean square error/root mean square deviation, equal to the square root of the second moment of the  
18   differences between the model values and the observational values, reflecting both model biases and error  
19   variances) and CORR (correlation coefficient, equal to the linear relationship between the modeled values and  
20   the observational values), were chosen to evaluate the two forecast experiments with priori emissions and  
21   analyzed emissions, respectively. For a single site, the three statistics (BIAS, RMSE and CORR) may change  
22   in two directions—for example, the BIAS (bias of the absolute emission amount) may get worse, but the  
23   RMSE (error variance) and CORR (in terms of the diurnal or day-to-day emission changes) may get better.  
24   To fairly evaluate and show the overall changes, the 531 lumped sites were classified into five different groups

1 to reflect the differences of the statistics. The classification and performance are listed in Table 4. The spatial  
2 distributions of the NO\_DA\_forecast statistics for each site are given in Fig. 11a and Fig. 12a. To better  
3 illustrate the changes of the statistics after applying the analyzed emissions, the differences  
4 (EMIS\_DA\_forecast – NO\_DA\_forecast), instead of the absolute values, are shown for the five defined  
5 groups in Fig. 11b-11f and Fig. 12b-12f. Specifically, the absolute values of the BIAS were used in the  
6 difference calculation.

7 Concerning single statistics, the BIAS, RMSE and CORR are improved at 383, 444 and 426 sites  
8 respectively for the year 2015 (Table 4), while the total valid sites are 524 in the whole domain. That is to say  
9 that the ratios of sites improved are 73%, 85% and 81%, respectively, as determined using BIAS, RMSE and  
10 CORR as the single criterion. When considering the overall performances using the three statistics, 300 sites  
11 (57%) are fully improved (BIAS/RMSE decrease and CORR increase), 138 sites (26%) are partially improved  
12 (either the BIAS and RMSE improved or the RMSE and CORR improved), only 16 sites (3%) are overall  
13 worse and the remaining approximately 13% of sites could not be justified. The performance in 2016 is even  
14 better than that in 2015, with the fully improved/overall worse sites being more/less, respectively, compared  
15 with the 2015 case.

16 Figure 11b shows that overall improvements are achieved in the whole domain, with the largest BIAS  
17 corrections occurring at the sites in the Sichuan Basin, Central China, Yangtze River Delta and Pearl River  
18 Delta (reaching 60-70% reductions) and the largest CORR improvement occurring in Xinjiang (reaching 0.35).  
19 The sites that are partially improved (Fig. 11c, d) and unclassified (Fig. 11e) are not in specific regions but are  
20 scattered through the whole domain. The sites that became overall worse (Fig. 11f) are very few, and the  
21 variances are relatively small. Consistent with Table 4, the performance in 2016 (Fig. 12) is even better than  
22 that in 2015 (Fig. 11), with the bias corrections being more significant, especially in the Sichuan Basin, Central  
23 China, the Yangtze River Delta and the Pearl River Delta, and the CORR improvements are even larger in

1 Xinjiang.

2  
3 **5.2 Time series of the regional mean**

4 Figure 13 shows the time series of the regional mean forecasts (NO\_DA\_forecast and  
5 EMIS\_DA\_forecast) and the observed SO<sub>2</sub> concentrations in 8 regions for 2015 and 2016. From the aspect of  
6 the regional mean, forecasts with priori emissions are severely overestimated in southern China (the Sichuan  
7 Basin, Central China, the Yangtze River Delta, and the Pearl River Delta), and the overestimations are largely  
8 corrected in the forecasts with analyzed emissions. For Northeastern China, the Energy Golden Triangle and  
9 Xinjiang, forecasts with priori emissions are underestimated, and forecasts with analyzed emissions helped to  
10 correct the biases. It is surprising to see that the regional averages in the North China Plain match well with  
11 the observations, although the site-to-site comparisons (Fig. 11 and 12) show large biases at single sites. As  
12 the sites in one region are averaged, the positive/negative biases among different sites might be offset in the  
13 averaged time series. For this reason, the RMSE and CORR of all the hourly data in one region are also  
14 calculated for verification.

15 The statistics of the BIAS, RMSE and CORR in the 8 regions are given in Table 5. From the aspect of  
16 the regional mean, the improvements obtained after applying the analyzed emissions are more significant in  
17 southern China than in northern China, with the RMSE decreased by 27.9-39.3%, the BIAS decreased by  
18 63.3%-78.2%, and the CORR increased by 16.7%-45.0% for the year 2015. For northern China, although the  
19 improvements are not so large, the BIAS still decreased (except in the North China Plain), and the decreasing  
20 ratio ranged from 6.3% to 22.9%, while the RMSE decreased by 4.2-8.8% and the CORR increased by 7.7%  
21 to 366.7%. The largest CORR increase occurred in Xinjiang, changing from 0.06 to 0.28, indicating that the  
22 newly added emission sources in the analyzed emissions are necessary. Compared to 2015, the improvements  
23 in 2016 are also larger, which is consistent with previous discussions.

## 1    **6. Conclusions**

2            Based upon our previous study (Peng *et al.* 2017), we further updated the WRF-Chem/EnKF DA system  
3    to quantitatively estimate gridded hourly SO<sub>2</sub> emissions using hourly surface observations as constraints.  
4    Different from Peng *et al.* (2017), direct emissions instead of emissions scaling factors were used as the  
5    analysis variables, which allows for the detection of new emissions sources.

6            The 2010 January MEIC priori emissions were used to generate 2015 and 2016 January analyzed  
7    emissions, applying the hourly surface SO<sub>2</sub> observations as constraints. Compared with the 2010 priori  
8    emissions, the analyzed emissions in January 2015 showed inhomogeneous change patterns in different  
9    regions. 1) Significant emissions reductions were found in southern China, including in the Sichuan Basin,  
10    Central China, the Yangtze River Delta and the Pearl River Delta; however, there were still some grids with  
11    slight emissions increases surrounding larger cities, indicating the emission transition due to urbanization  
12    development. The reduction ratios of the total January emissions for the aforementioned four regions were -  
13    10.5%, -9.9%, -13.8% and -22.9%, respectively. 2) For northern China (the Northern China Plain and  
14    Northeastern China), the situation is more complicated during the winter heating season. Comparisons show  
15    large emissions reductions in larger cities but wide increases in surrounding suburban and rural regions, which  
16    may indicate missing raw coal combustions not taken into account in the priori emission inventory. The  
17    increase ratios of the total January emissions for the Northern China Plain and Northeastern China were 12.7%  
18    and 49.4%, respectively. 3) Significantly large emissions increases were found in western China (the Energy  
19    Golden Triangle and Xinjiang) due to the energy expansion strategy, which is consistent with satellite  
20    observations (e.g., Ling *et al.*, 2017). The increase ratio of the total January emissions for the Energy Golden  
21    Triangle and Xinjiang were 25.6%, and 72.0%, respectively. It should be noted that the comparisons between  
22    the 2010 priori emissions and the 2015 analyzed emissions not only reflect the changes during the five years  
23    but also include the uncertainties in the priori emissions (either due to uncertainties in the total annual/monthly



emissions or to the allocation process from the provincial emissions to the gridded data). Comparisons of the 2015 and 2016 analyzed emissions show wide emissions reductions from 2015 to 2016, which is consistent with a recent study on emissions changing trends using the “bottom-up” approach (Zheng *et al.*, 2018), indicating that stricter control strategies have been fully executed nationwide. These changes coincided with the period of the energy development national strategy in northwestern China and regulations for the reduction of SO<sub>2</sub> emissions, indicating that the updated DA system was possibly capable of detecting the emissions deficiencies, dynamically updating the spatial-temporal emission changes (2010 to 2015/2016), and locating the newly added sources. The detection of emissions changes by the DA system can be localized to the city level, benefitting from the intensive observations and the model grid resolution.

It is difficult to verify the accuracy of the analyzed emissions, as the “bottom-up” emissions inventories for 2015 and 2016 are not yet available for comparison. Two sets of forecast experiments using the prior emissions and the analyzed emissions were conducted to show the differences and improvements. Among the lumped 531 sites, 300 sites were fully improved (BIAS and RMSE reduced and CORR increased), and only 16 sites were entirely worse for the year 2015. The other 138 sites were partially improved (two statistics became better). The improvements were much larger in southern China than in northern and western China. Upon using the analyzed emissions, the BIAS and RMSE were reduced by 61.8%-78.2% and 27.9%-52.2%, respectively, and the correlation coefficient increased by 12.5% - 47.1% for southern China regions (the Sichuan Basin, Central China, the Yangtze River Delta, and the Pearl River Delta). However, for northern and western China, where the original BIAS and RMSE values were larger, the decreases were relatively smaller. Nevertheless, the correlations were indeed improved, especially for Xinjiang, as new emissions were captured in the analyzed emissions. The distinction of the comparisons among different regions (northern/western regions vs. southern regions) indicated the deficiencies of the perturbation procedure in the DA system when applied to the northern/western regions. Further investigations should be conducted to generate larger spreads

1 for those regions in future studies.

2 Our study serves as an example indicating that the ensemble Kalman filter algorithm combined with the  
3 WRF-Chem regional model can be used to optimize model-ready gridded hourly emissions inputs by using  
4 hourly surface observations as constraints. This approach is useful for assessing emissions control strategies  
5 and can also improve forecasting skills. The limitation of this study is that the analyzed emissions are still  
6 model-dependent, as the ensembles are conducted through the WRF-Chem model, and thus, the performance  
7 of the ensembles is model-dependent. Changes in the model configuration (e.g., the spatial resolution or  
8 chemistry options) can cause differences in the DA system. In our study, the model resolution is 40 km, which  
9 might be too coarse for SO<sub>2</sub>, as it's a relatively short-lifetime specie, and the localized characteristics might  
10 not be captured by the system. In addition, the reactions of SO<sub>2</sub> are only reflected in the WRF-Chem system  
11 and not in the EnKF process. Considering the reaction time of SO<sub>2</sub> in the ambient atmosphere, there might be  
12 some time lag in the hourly emission factors.

## 14 **Author contributions**

15 ZL and DC designed research; DC performed research; JB contributed towards development of DA  
16 system; MC provides funds; DC wrote the paper, with contributions from all co-authors.

## 17 **Acknowledgement**

18 This work was supported by the National Key R&D Program on Monitoring, Early Warning and  
19 Prevention of Major Natural Disasters under grant (2017YFC1501406), the National Natural Science  
20 Foundation of China (Grant No. 41807312) and Basic R&D special fund for central scientific research  
21 institutes (IUMKYSZHZ201701). NCAR is sponsored by US National Science Foundation. We would like to  
22 thank Zhen Peng for useful discussions and patient guide on DA system development.

## 1    **References**

- 2        Chen, D., Liu, Z. Q., Fast, J., and Ban, J. M.: Simulations of sulfate-nitrate-ammonium (SNA) aerosols during the  
3 extreme haze events over northern China in October 2014, *Atmos. Chem. Phys.*, 16, 10707-10724, 10.5194/acp-16-  
4 10707-2016, 2016.
- 5        Chen, Q., Fu, T.-M., Hu, J., Ying, Q., and Zhang, L.: Modelling secondary organic aerosols in China, *Natl. Sci. Rev.*,  
6 4(6), 806-809, 2017.
- 7        Chen, D., Liu, Z., Ban, J., Zhao, P., and Chen, M.: Retrospective analysis of 2015–2017 winter-time PM<sub>2.5</sub> in  
8 China: response to emission regulations and the role of meteorology, *Atmos. Chem. Phys. Discuss.*,  
9 <https://doi.org/10.5194/acp-2018-890>, in review, 2018.
- 10        Chen, F., and Dudhia, J.: Coupling an advanced land surface-hydrology model with the Penn State-NCAR MM5  
11 modeling system. Part I: Model implementation and sensitivity, *Mon. Weather Rev.*, 129, 569-585, 2001.
- 12        Cheng, M. M., Zhi, G. R., Tang, W., Liu, S. J., Dang, H. Y., Guo, Z., Du, J. H., Du, X. H., Zhang, W. Q., Zhang, Y.  
13 J., and Meng, F.: Air pollutant emission from the underestimated households' coal consumption source in China, *Sci*  
14 *Total Environ.*, 580, 641-650, 10.1016/j.scitotenv.2016.12.143, 2017.
- 15        Chin, M., Savoie, D. L., Huebert, B. J., Bandy, A. R., Thornton, D. C., Bates, T. S., Quinn, P. K., Saltzman, E. S.,  
16 and De Bruyn, W. J.: Atmospheric sulfur cycle simulated in the global model GOCART: Comparison with field  
17 observations and regional budgets, *J. Geophys. Res.-Atmos.*, 105, 24689-24712, doi:10.1029/2000jd900385, 2000.
- 18        Chin, M., Ginoux, P., Kinne, S., Torres, O., Holben, B. N., Duncan, B. N., Martin, R. V., Logan, J. A., Higurashi,  
19 A., and Nakajima, T.: Tropospheric aerosol optical thickness from the GOCART model and comparisons with satellite  
20 and Sun photometer measurements, *J. Atmos. Sci.*, 59, 461-483, doi:10.1175/1520-  
21 0469(2002)059<0461:Taotft>2.0.Co;2, 2002.
- 22        Chou, M.-D., and M.J. Suarez.: An efficient thermal infrared radiation parameterization for use in general  
23 circulation models, NASA Tech. Memo., TM 104606, vol. 3, 25 pp., NASA Goddard Space Flight Cent., Greenbelt, Md.  
24 1994
- 25        Dai, T., Schutgens, N.A.J., Goto, D. Shi, G.Y., Nakajima, T.: Improvement of aerosol optical properties modeling  
26 over Eastern Asia with MODIS AOD assimilation in a global non-hydrostatic icosahedral aerosol transport model,  
27 *Environ. Pollut.*, 195, 319–329, 2014.
- 28        Evensen, G.: Sequential data assimilation with a nonlinear quasi-geostrophic model using Monte Carlo methods to  
29 forecast error statistics, *J. Geophys. Res.*, 99, 10143–10162, doi:10.1029/94JC00572, 1994.
- 30        Fast, J. D., Gustafson, W. I., Easter, R. C., Zaveri, R. A., Barnard, J. C., Chapman, E. G., Grell, G. A., and Peckham,  
31 S. E.: Evolution of ozone, particulates, and aerosol direct radiative forcing in the vicinity of Houston using a fully  
32 coupled meteorology-chemistry-aerosol model, *J. Geophys. Res.-Atmos.*, 111, D21305, doi:10.1029/2005jd006721,  
33 2006.
- 34        Gaspari, G., and S. E. Cohn.: Construction of correlation functions in two and three dimensions. *Quart. J. Roy.*  
35 *Meteor. Soc.*, 125, 723–757, <https://doi.org/10.1002/qj.49712555417>, 2006.
- 36        Grell, G. A., and Devenyi, D.: A generalized approach to parameterizing convection combining ensemble and data  
37 assimilation techniques, *Geophys. Res. Lett.*, 29, Art. 1693. Doi 10.1029/2002gl015311, 2002.
- 38        Grell, G. A., Peckham, S. E., Schmitz, R., McKeen, S. A., Frost, G., Skamarock, W. C., and Eder, B.: Fully coupled  
39 "online" chemistry within the WRF model, *Atmos. Environ.*, 39, 6957-6975, doi:10.1016/j.atmosenv.2005.04.027, 2005.
- 40        Guerrette, J. J. and Henze, D. K.: Four-dimensional variational inversion of black carbon emissions during  
41 ARCTAS-CARB with WRFDA-Chem, *Atmos. Chem. Phys.*, 17, 7605-7633, <https://doi.org/10.5194/acp-17-7605-2017>,  
42 2017
- 43        Hong, S. Y., Noh, Y., and Dudhia, J.: A new vertical diffusion package with an explicit treatment of entrainment  
44 processes, *Mon. Weather Rev.*, 134, 2318-2341, 2006.
- 45        Koukouli, M. E., Balis, D. S., van der A, R. J., Theys, N., Hedelt, P., Richter, A., Krotkov, N., Li, C., and Taylor,  
46 M.: Anthropogenic sulphur dioxide load over China as observed from different satellite sensors, *Atmos. Environ.*, 145,

45-59, 10.1016/j.atmosenv.2016.09.007, 2016.

He, K.B., Multi-resolution emission Inventory for China (MEIC): model framework and 1990-2010 anthropogenic emissions. In: Presented on the international Global Atmospheric Chemistry Conference, September 17-21, Beijing, China 2012

Hong, C. P., Zhang, Q., He, K. B., Guan, D. B., Li, M., Liu, F., and Zheng, B.: Variations of China's emission estimates: response to uncertainties in energy statistics, *Atmos. Chem. Phys.*, 17, 1227-1239, 10.5194/acp-17-1227-2017, 2017.

Houtekamer, P. L., Mitchell, H. L., Pellerin, G., Buehner, M., Charron, M., Spacek, L., and Hansen, B.: Atmospheric data assimilation with an ensemble Kalman filter: Results with real observations, *Mon. Weather Rev.*, 133, 604–620, 2005.

Huneeus, N., Boucher, O., and Chevallier, F.: Atmospheric inversion of SO<sub>2</sub> and primary aerosol emissions for the year 2010, *Atmos. Chem. Phys.*, 13, 6555-6573, 10.5194/acp-13-6555-2013, 2013.

Hunt, B. R., Kostelich, E. J., and Szunyogh, I.: Efficient data assimilation for spatiotemporal chaos: A local ensemble transform Kalman filter, *Physica D*, 230, 112–126, 2007.

Lee, C., Martin, R. V., van Donkelaar, A., Lee, H., Dickerson, R. R., Hains, J. C., Krotkov, N., Richter, A., Vinnikov, K., and Schwab, J. J.: SO<sub>2</sub> emissions and lifetimes: Estimates from inverse modeling using in situ and global, space-based (SCIAMACHY and OMI) observations, *J. Geophys. Res.-Atmos.*, 116, Artn D06304, 10.1029/2010jd014758, 2011.

Lei, Y., Zhang, Q., He, K. B., and Streets, D. G.: Primary anthropogenic aerosol emission trends for China, 1990-2005, *Atmos. Chem. Phys.*, 11, 931-954, 10.5194/acp-11-931-2011, 2011.

Li, W. J., Zhou, S. Z., Wang, X. F., Xu, Z., Yuan, C., Yu, Y. C., Zhang, Q. Z., and Wang, W. X.: Integrated evaluation of aerosols from regional brown hazes over northern China in winter: Concentrations, sources, transformation, and mixing states, *J. Geophys. Res.-Atmos.*, 116, Artn D09301, 10.1029/2010jd015099, 2011.

Li, C., Zhang, Q., Krotkov, N. A., Streets, D. G., He, K., Tsay, S. C., and Gleason, J. F.: Recent large reduction in sulfur dioxide emissions from Chinese power plants observed by the Ozone Monitoring Instrument, *Geophys. Res. Lett.*, 37, L08807, <https://doi.org/10.1029/2010GL042594>, 2010.

Li, M., Zhang, Q., Streets, D. G., He, K. B., Cheng, Y. F., Emmons, L. K., Huo, H., Kang, S. C., Lu, Z., Shao, M., Su, H., Yu, X., and Zhang, Y.: Mapping Asian anthropogenic emissions of non-methane volatile organic compounds to multiple chemical mechanisms, *Atmos. Chem. Phys.*, 14, 5617-5638, 10.5194/acp-14-5617-2014, 2014.

Ling, Z. L., Huang, T., Zhao, Y., Li, J. X., Zhang, X. D., Wang, J. X., Lian, L. L., Mao, X. X., Gao, H., and Ma, J. M.: OMI-measured increasing SO<sub>2</sub> emissions due to energy industry expansion and relocation in northwestern China, *Atmos. Chem. Phys.*, 17, 9115-9131, 10.5194/acp-17-9115-2017, 2017.

Liu, Z. Q., Liu, Q. H., Lin, H. C., Schwartz, C. S., Lee, Y. H., and Wang, T. J.: Three-dimensional variational assimilation of MODIS aerosol optical depth: Implementation and application to a dust storm over East Asia, *J. Geophys. Res.-Atmos.*, 116, Artn D23206. doi:10.1029/2011jd016159, 2011.

McKeen, S. A., Wotawa, G., Parrish, D. D., Holloway, J. S., Buhr, M. P., Hubler, G., Fehsenfeld, F. C., and Meagher, J. F.: Ozone production from Canadian wildfires during June and July of 1995, *J. Geophys. Res.-Atmos.*, 107, 4192, doi:10.1029/2001jd000697, 2002.

McLinden, C. A., Fioletov, V., Shephard, M. W., Krotkov, N., Li, C., Martin, R. V., Moran, M. D., and Joiner, J.: Space-based detection of missing sulfur dioxide sources of global air pollution, *Nat. Geosci.*, 9, 496–500, <https://doi.org/10.1038/ngeo2724>, 2016.

Miyazaki, K., Eskes, H. J., and Sudo, K.: Global NO<sub>x</sub> emission estimates derived from an assimilation of OMI tropospheric NO<sub>2</sub> columns, *Atmos. Chem. Phys.*, 12, 2263-2288, 10.5194/acp-12-2263-2012, 2012.

Miyazaki, K., and Eskes, H.: Constraints on surface NO<sub>x</sub> emissions by assimilating satellite observations of multiple species, *Geophys. Res. Lett.*, 40, 4745-4750, 10.1002/grl.50894, 2013.

Mizzi, A. P., Arellano, A. F., Edwards, D. P., Anderson, J. L., and Pfister, G. G.: Assimilating compact phase space retrievals of atmospheric composition with WRF-Chem/DART: a regional chemical transport/ensemble Kalman filter

data assimilation system. *Geoscientific Model Development*, 9(3), 965- 740, 2016

Ministry of Environmental Protect, 12th Five-year Plan of Prevention and Control of Atmospheric Pollution in Key Areas, Beijing, 2012.

Mlawer, E. J., Taubman, S. J., Brown, P. D., Iacono, M. J., and Clough, S. A.: Radiative transfer for inhomogeneous atmospheres: RRTM, a validated correlated-k model for the longwave, *J. Geophys. Res.-Atmos.*, 102, 16663-16682, 1997.

Pagowski, M., and Grell, G. A.: Experiments with the assimilation of fine aerosols using an ensemble Kalman filter, *J. Geophys. Res.-Atmos.*, 117, D21302, doi:10.1029/2012jd018333, 2012.

Peng, Z., Liu, Z. Q., Chen, D., and Ban, J. M.: Improving PM<sub>2.5</sub> forecast over China by the joint adjustment of initial conditions and source emissions with an ensemble Kalman filter, *Atmos. Chem. Phys.*, 17, 4837-4855, 10.5194/acp-17-4837-2017, 2017.

Peng, Z., Lei, L., Liu, Z., Sun, J., Ding, A., Ban, J., Chen, D., Kou, X., and Chu, K.: The impact of multi-species surface chemical observation assimilation on air quality forecasts in China, *Atmos. Chem. Phys.*, 18, 17387-17404, <https://doi.org/10.5194/acp-18-17387-2018>, 2018.

Schwartz, C. S., Liu, Z. Q., Lin, H. C., and Cetola, J. D.: Assimilating aerosol observations with a "hybrid" variational-ensemble data assimilation system, *J. Geophys. Res.-Atmos.*, 119, 4043-4069, 10.1002/2013jd020937, 2014.

Shen, Y. J., Zhang, X. D., Brook, J. R., Huang, T., Zhao, Y., Gao, H., and Ma, J. M.: Satellite Remote Sensing of Air Quality in the Energy Golden Triangle in Northwest China, *Environ. Sci. Tech. Let.*, 3, 275-279, 10.1021/acs.estlett.6b00182, 2016.

The Central Government of the People's Republic of China, The development of the western region in China: the twelfth five-year plan, 2012

The Central Government of the People's Republic of China, Strategic action Plan for Energy development (2014-2020), 2014

Wang, X. F., Wang, W. X., Yang, L. X., Gao, X. M., Nie, W., Yu, Y. C., Xu, P., Zhou, Y., and Wang, Z.: The secondary formation of inorganic aerosols in the droplet mode through heterogeneous aqueous reactions under haze conditions, *Atmos. Environ.*, 63, 68-76, 10.1016/j.atmosenv.2012.09.029, 2012.

Wild, O., Zhu, X., and Prather, M. J.: Fast-j: Accurate simulation of in- and below-cloud photolysis in tropospheric chemical models, *J. Atmos. Chem.*, 37, 245-282, 2000.

Tang, X., Zhu, J., Wang, Z. F., and Gbaguidi, A.: Improvement of ozone forecast over Beijing based on ensemble Kalman filter with simultaneous adjustment of initial conditions and emissions, *Atmos. Chem. Phys.*, 11, 12901-12916, 10.5194/acp-11-12901-2011, 2011.

Tang, X., Zhu, J., Wang, Z. F., Wang, M., Gbaguidi, A., Li, J., Shao, M., Tang, G. Q., and Ji, D. S.: Inversion of CO emissions over Beijing and its surrounding areas with ensemble Kalman filter, *Atmos. Environ.*, 81, 676-686, 10.1016/j.atmosenv.2013.08.051, 2013.

Tang, X., Zhu, J., Wang, Z. F., Gbaguidi, A., Lin, C. Y., Xin, J. Y., Song, T., and Hu, B.: Limitations of ozone data assimilation with adjustment of NO<sub>x</sub> emissions: mixed effects on NO<sub>2</sub> forecasts over Beijing and surrounding areas, *Atmos. Chem. Phys.*, 16, 6395-6405, 10.5194/acp-16-6395-2016, 2016.

The Central People's Government of the People Republic of China, Atmospheric Pollution Prevention and Control Action Plan, 2013.

Zaveri, R. A., and Peters, L. K.: A new lumped structure photochemical mechanism for large-scale applications, *J. Geophys. Res.-Atmos.*, 104, 30387-30415, 1999.

Zaveri, R. A., Easter, R. C., Fast, J. D., and Peters, L. K.: Model for Simulating Aerosol Interactions and Chemistry (MOSAIC), *J. Geophys. Res.-Atmos.*, 113, D13204, doi:10.1029/2007jd008782, 2008.

Zhang, Q., Streets, D. G., Carmichael, G. R., He, K. B., Huo, H., Kannari, A., Klimont, Z., Park, I. S., Reddy, S., Fu, J. S., Chen, D., Duan, L., Lei, Y., Wang, L. T., and Yao, Z. L.: Asian emissions in 2006 for the NASA INTEX-B mission, *Atmos. Chem. Phys.*, 9, 5131-5153, 2009.

Zhao, Y., Zhou, Y. D., Qiu, L. P., and Zhang, J.: Quantifying the uncertainties of China's emission inventory for

1 industrial sources: From national to provincial and city scales, *Atmos. Environ.*, 165, 207-221,  
2 10.1016/j.atmosenv.2017.06.045, 2017.

3 Zhao, Y., Nielsen, C. P., Lei, Y., McElroy, M. B., and Hao, J.: Quantifying the uncertainties of a bottom-up emission  
4 inventory of anthropogenic atmospheric pollutants in China, *Atmos. Chem. Phys.*, 11, 2295-2308, 10.5194/acp-11-2295-  
5 2011, 2011.

6 Zheng, B., Zhang, Q., Zhang, Y., He, K. B., Wang, K., Zheng, G. J., Duan, F. K., Ma, Y. L., and Kimoto, T.:  
7 Heterogeneous chemistry: a mechanism missing in current models to explain secondary inorganic aerosol formation  
8 during the January 2013 haze episode in North China, *Atmos Chem Phys*, 15, 2031-2049, 10.5194/acp-15-2031-2015,  
9 2015.

10 Zheng, B., Tong, D., Li, M., Liu, F., Hong, C. P., Geng, G. N., Li, H. Y., Li, X., Peng, L. Q., Qi, J., Yan, L., Zhang,  
11 Y. X., Zhao, H. Y., Zheng, Y. X., He, K. B., and Zhang, Q.: Trends in China's anthropogenic emissions since 2010 as the  
12 consequence of clean air actions, *Atmos Chem Phys*, 18, 14095-14111, 10.5194/acp-18-14095-2018, 2018.

13 Zhi, G. R., Zhang, Y. Y., Sun, J. Z., Cheng, M. M., Dang, H. Y., Liu, S. J., Yang, J. C., Zhang, Y. Z., Xue, Z. G., Li,  
14 S. Y., and Meng, F.: Village energy survey reveals missing rural raw coal in northern China: Significance in science and  
15 policy, *Environ. Pollut.*, 223, 705-712, 10.1016/j.envpol.2017.02.009, 2017.

|    |                                                                                                                                          |
|----|------------------------------------------------------------------------------------------------------------------------------------------|
| 1  | <b>Tables and Figures</b>                                                                                                                |
| 2  | <b>Table 1.</b> WRF-Chem model configuration.                                                                                            |
| 3  | <b>Table 2.</b> Experiments conducted in this study and the three groups of comparisons.                                                 |
| 4  | <b>Table 3.</b> Priori and analyzed January emissions and the changing ratios for 8 regions (units: $10^6$ kg per day)                   |
| 5  | <b>Table 4.</b> Overall statistics changes of the EMIS_DA_FCST experiment compared with the NO_DA_FCST                                   |
| 6  | experiment                                                                                                                               |
| 7  | <b>Table 5.</b> Statistics of the EMIS_DA_FCST and NO_DA_FCST experiments in 8 regions (units: $\mu\text{g m}^{-3}$ for                  |
| 8  | BIAS and RMSE)                                                                                                                           |
| 9  | <b>Figure 1.</b> Flow chart of the data assimilation system that simultaneously optimizes the initial chemical                           |
| 10 | conditions and emissions.                                                                                                                |
| 11 | <b>Figure 2.</b> Spatial distribution of the priori $\text{SO}_2$ emissions used in this study. Regions defined in red rectangles        |
| 12 | are: a-NCP (the North China Plain), b-NEC (Northeastern China), c-EGT (the Energy Golden Triangle), d-XJ                                 |
| 13 | (Xinjiang), e-SB (the Sichuan Basin), f-CC (Central China), g-YRD (the Yangtze River Delta), and h-PRD                                   |
| 14 | (the Pearl River Delta). The color bars of the regional plots have the same meaning as those in the national                             |
| 15 | one. Units: $\text{mol km}^{-2} \text{h}^{-1}$ .                                                                                         |
| 16 | <b>Figure 3.</b> Observed and modeled monthly average $\text{SO}_2$ concentrations for January in 2015 (Left) and 2016                   |
| 17 | (right). (a) Observations, where the ranges of the different colors are the same as those of the color bars of                           |
| 18 | (b) and (c); (b) NO_DA, (c) CONC_DA, and (d) CONC_DA-NO_DA. Units: $\mu\text{g m}^{-3}$ .                                                |
| 19 | <b>Figure 4.</b> The spatial distribution of the statistics between the model simulations and the observations for                       |
| 20 | (a) January 2015 and (b) January 2016. Top: NO_DA vs. observation, bottom: CONC_DA vs. observation.                                      |
| 21 | Units: $\mu\text{g m}^{-3}$ for BIAS and RMSE.                                                                                           |
| 22 | <b>Figure 5.</b> Observed and modeled $\text{SO}_2$ ambient concentration changes (January 2016 - January 2015). (a)                     |
| 23 | Observations, where the ranges of different colors are the same as those of the color bars of (b) and (c), (b)                           |
| 24 | NO_DA, and (c) CONC_DA. (Units: $\mu\text{g m}^{-3}$ )                                                                                   |
| 25 | <b>Figure 6.</b> Regional averaged RMSE and the total spread for (a) January 2015 and (b) January 2016 in 8                              |
| 26 | regions. Time starts from 00UTC. (Units: $\mu\text{g m}^{-3}$ ).                                                                         |
| 27 | <b>Figure 7.</b> Analyzed emissions for (a) January 2015 and (b) January 2016. (c) The differences of the 2015-                          |
| 28 | 2010_prior and (d) ratios of the 2015/2010_prior. (e) The differences of the 2016-2015 and (f) ratios of                                 |
| 29 | 2016/2015. Units are $\text{mol km}^{-2} \text{h}^{-1}$ for (a), (b), (c) and (e).                                                       |
| 30 | <b>Figure 8.</b> The differences between the analyzed 2015 January emissions and the 2010 priori emissions in 8                          |
| 31 | regions. Left panels are emission differences of 2015-2010 (units: $\text{mol km}^{-2} \text{h}^{-1}$ ), and right panels are the ratios |
| 32 | of 2015/2010 in each region.                                                                                                             |

1 **Figure 9.** Same as Figure 8, but for the differences between the analyzed 2016 January emissions and the  
2 2015 January emissions in 8 regions. Left panels are emission differences of 2016-2015 (units: mol km<sup>-2</sup> h<sup>-1</sup>), and right panels are the ratios of 2016/2015 in each region.

4 **Figure 10.** Hourly factors in the priori emission inventory and those derived from the EMIS\_DA experiment  
5 in 8 regions.

6 **Figure 11.** The spatial distribution of the error statistics between the model simulations and the observations  
7 for January 2015. (a) Statistics between NO\_DA\_FCST and the observations, with BIAS and RMSE in μg  
8 m<sup>-3</sup>; (b)-(f) the statistics improvements from NO\_DA\_FCST to EMIS\_DA\_FCST for different groups of  
9 sites (classification in Table 2), with the BIAS and RMSE improvements in percentages. The color bars are  
10 all the same for (b)-(f) and are shown only in (c) and (f) to save space.

11 **Figure 12.** Same as Figure 11, but for January 2016.

12

13 **Figure 13.** Time series of the regional mean SO<sub>2</sub> concentrations from the observations and from model  
14 simulations with the priori and analyzed (posterior) emissions for (a) January 2015 and (b) January 2016 in 8  
15 regions. Time starts from 00UTC. (Units: μg m<sup>-3</sup>)  
16  
17



**Table 1.** WRF-Chem model configuration.

|                                             |                                                                                                                                                                      |
|---------------------------------------------|----------------------------------------------------------------------------------------------------------------------------------------------------------------------|
| Aerosol scheme                              | MOSAIC (4 bins) (Zaveri <i>et al.</i> , 2008)                                                                                                                        |
| Photolysis scheme                           | Fast-J (Wild <i>et al.</i> , 2000)                                                                                                                                   |
| Gas phase chemistry                         | CBM-Z (Zavner <i>et al.</i> , 1999)                                                                                                                                  |
| Cumulus parameterization                    | Grell 3D scheme                                                                                                                                                      |
| Short-wave radiation                        | Goddard Space Flight Center Shortwave radiation scheme (Chou and Suarez, 1994)                                                                                       |
| Long-wave radiation                         | RRTM (Mlawer <i>et al.</i> , 1997)                                                                                                                                   |
| Microphysics                                | Single-Moment 6-class scheme (Grell and Devenyi, 2002)                                                                                                               |
| Land-surface model                          | NOAH LSM (Chen and Dudhia, 2001)                                                                                                                                     |
| Land use type                               | USGS 2m (kept the same for 2010-2015-2016)                                                                                                                           |
| Boundary layer scheme                       | YSU (Hong <i>et al.</i> , 2006)                                                                                                                                      |
| Meteorology initial and boundary conditions | GFS analysis and forecast data at 6-hr frequency for control experiment, interpolated at 1-hr frequency for hourly assimilation experiments and forecast experiments |
| Initial condition for chemical species      | 11-day spin-up                                                                                                                                                       |
| Boundary conditions for chemical species    | averages of mid-latitude aircraft profiles (McKeen <i>et al.</i> , 2002)                                                                                             |
| Dust and sea salt Emissions                 | GOCART (Chin <i>et al.</i> , 2000, 2002)                                                                                                                             |

**Table 2.** Experiments conducted in this study and the three groups of comparisons.

|                     |         | Design of the simulation                                                                                                                                                                                               | Purpose of the simulation                                                                      | Purpose of the comparisons                                                                                                                                                                                                                                                                                                                                                                                                                                                                                                                                                                                                                                                  |
|---------------------|---------|------------------------------------------------------------------------------------------------------------------------------------------------------------------------------------------------------------------------|------------------------------------------------------------------------------------------------|-----------------------------------------------------------------------------------------------------------------------------------------------------------------------------------------------------------------------------------------------------------------------------------------------------------------------------------------------------------------------------------------------------------------------------------------------------------------------------------------------------------------------------------------------------------------------------------------------------------------------------------------------------------------------------|
| Control experiments | NO_DA   | 6-hr WRF-Chem cycling run with prior MEIC_2010                                                                                                                                                                         | Generate 2015-2016 concentration fields assuming the same emissions as in 2010 prior emissions | Concentrations from CONC_DA versus that from NO_DA:<br>As the concentrations from CONC_DA is very close to the observations, the concentration differences between CONC_DA and NO_DA possibly indicated a model deficiency in reproducing the reality, which was mainly from the emissions changes from 2010 to 2015-2016. The assumption is that the GFS 6-hr analysis data provide good meteorological IC/BC values and that the model accurately simulated the meteorology conditions; thus, the emissions were the major deficiency in the model.                                                                                                                       |
| DA experiments      | CONC_DA | WRF-Chem (with prior MEIC_2010) and GSI 3D-var hourly DA cycle<br><br>Hourly observations were assimilated and WRF-Chem concentration output were updated                                                              | Generate 2015-2016 concentration reanalysis fields integrating hourly observations             |                                                                                                                                                                                                                                                                                                                                                                                                                                                                                                                                                                                                                                                                             |
|                     | EMIS_DA | WRF-Chem (with prior MEIC_2010 at the beginning and later with forecast emissions) and EnSRF hourly DA cycle<br><br>Hourly observations were assimilated, and WRF-Chem concentration output and emissions were updated | Generate 2015-2016 analyzed emissions with hourly observations as constraints                  | Updated emissions from EMIS_DA versus prior emissions:<br>The emissions differences between the 2015 analyzed emissions and the 2010 priori emissions not only reflected the changes from 2010 to 2015 but also included the deficiencies in the 2010 priori emission.<br><br>Updated emissions between different years:<br>The differences between the 2016 analyzed emissions and the 2015 analyzed emissions reflected the pure emissions changes from 2015 to 2016, since the deficiencies of the 2010 priori emissions were offset in the subtraction<br><br>The emissions control policies are discussed to investigate whether the emissions changes are reasonable. |

|                      |                  |                                                                                              |                                                                           |                                                                                                                                                 |
|----------------------|------------------|----------------------------------------------------------------------------------------------|---------------------------------------------------------------------------|-------------------------------------------------------------------------------------------------------------------------------------------------|
| Forecast experiments | NO_DA_forecast   | 24-hr WRF-Chem forecast with prior MEIC_2010, chemistry IC from CONC_DA at 00UTC             | The simulation with only improved initial condition                       | Concentrations from EMIS_DA_forecast versus that from NO_DA_forecast:<br>The benefit by using updated emissions can be quantitatively assessed. |
|                      | EMIS_DA_forecast | 24-hr WRF-Chem forecast with updated 2015-2016 emissions, chemistry IC from CONC_DA at 00UTC | The simulation with both improved initial condition and updated emissions |                                                                                                                                                 |

**Table 3.** Priori and analyzed January emissions and the changing ratios for 8 regions (units:  $10^6$  kg per day)

|     | 2010_prior | 2015_posterior | 2016_ posterior | (2015-2010)<br>/2010 | (2016-2015)<br>/2015 |
|-----|------------|----------------|-----------------|----------------------|----------------------|
| NCP | 16.23      | 18.29          | 17.33           | 12.7%                | -5.3%                |
| NEC | 4.12       | 6.16           | 5.30            | 49.4%                | -13.9%               |
| ETR | 11.01      | 13.82          | 13.01           | 25.6%                | -5.9%                |
| XJ  | 1.62       | 2.79           | 2.34            | 72.0%                | -16.1%               |
| SB  | 17.12      | 15.33          | 13.43           | -10.5%               | -12.4%               |
| CC  | 9.95       | 8.96           | 7.57            | -9.9%                | -15.5%               |
| YRD | 5.80       | 5.00           | 4.65            | -13.8%               | -7.0%                |
| PRD | 1.82       | 1.40           | 1.23            | -22.9%               | -12.6%               |

**Table 4.** Overall statistics changes of the EMIS\_DA\_FCST experiment compared with the NO\_DA\_FCST experiment

| Types                              | BIAS     | RMSE     | CORR     |      |      |
|------------------------------------|----------|----------|----------|------|------|
| 2015                               |          |          |          |      |      |
| Better                             | 383      | 444      | 426      |      |      |
| Worse                              | 141      | 80       | 97       |      |      |
| 2016                               |          |          |          |      |      |
| Better                             | 375      | 444      | 456      |      |      |
| Worse                              | 148      | 79       | 67       |      |      |
|                                    |          |          |          |      |      |
| Groups                             | BIAS     | RMSE     | CORR     | 2015 | 2016 |
| A. Overall improved                | decrease | decrease | increase | 300  | 321  |
| B. Partially improved (BIAS, RMSE) | decrease | decrease | decrease | 61   | 43   |
| C. Partially improved (RMSE, CORR) | increase | decrease | increase | 77   | 71   |
| D. Not justified                   |          |          |          | 70   | 77   |
| E. Overall worse                   | increase | increase | decrease | 16   | 11   |

**Table 5.** Statistics of the EMIS\_DA\_FCST and NO\_DA\_FCST experiments in 8 regions (units:  $\mu\text{g m}^{-3}$  for BIAS and RMSE)

|      |         |        | BIAS  |         |             | RMSE  |         |             | CORR  |         |             |
|------|---------|--------|-------|---------|-------------|-------|---------|-------------|-------|---------|-------------|
|      | N sites | N data | NO_DA | EMIS_DA | Changes (%) | NO_DA | EMIS_DA | Changes (%) | NO_DA | EMIS_DA | Changes (%) |
| 2015 |         |        |       |         |             |       |         |             |       |         |             |
| NCP  | 67      | 46699  | -9.6  | -10.1   | 5.2%        | 53.7  | 49.0    | -8.8%       | 0.52  | 0.62    | 19.2%       |
| NEC  | 30      | 20910  | -29.3 | -22.6   | -22.9%      | 61.8  | 57.1    | -7.6%       | 0.52  | 0.56    | 7.7%        |
| EGT  | 45      | 31365  | -41.2 | -38.6   | -6.3%       | 84.8  | 81.2    | -4.2%       | 0.53  | 0.58    | 9.4%        |
| XJ   | 19      | 13243  | -12.6 | -10.3   | -18.3%      | 36.8  | 33.7    | -8.4%       | 0.06  | 0.28    | 366.7%      |
| SB   | 48      | 33456  | 9.7   | 2.7     | -72.2%      | 45.1  | 32.5    | -27.9%      | 0.20  | 0.29    | 45.0%       |
| CC   | 53      | 36941  | 6.1   | -1.4    | -77.0%      | 49.7  | 34.6    | -30.4%      | 0.32  | 0.39    | 21.9%       |
| YRD  | 34      | 23698  | 10.9  | 4.0     | -63.3%      | 37.0  | 24.9    | -32.7%      | 0.47  | 0.55    | 17.0%       |
| PRD  | 20      | 13940  | 8.7   | 1.9     | -78.2%      | 24.7  | 15.0    | -39.3%      | 0.42  | 0.49    | 16.7%       |
| 2016 |         |        |       |         |             |       |         |             |       |         |             |
| NCP  | 67      | 46699  | 2.1   | -0.3    | -85.7%      | 41.5  | 36.2    | -12.8%      | 0.58  | 0.69    | 19.0%       |
| NEC  | 30      | 20910  | -16.8 | -14.7   | -12.5%      | 41.2  | 36.9    | -10.4%      | 0.50  | 0.58    | 16.0%       |
| EGT  | 45      | 31365  | -27.7 | -26.6   | -4.0%       | 64.5  | 61.2    | -5.1%       | 0.56  | 0.63    | 12.5%       |
| XJ   | 19      | 13243  | -5.8  | -6.0    | 3.4%        | 30.5  | 26.9    | -11.8%      | 0.23  | 0.47    | 104.3%      |
| SB   | 48      | 33456  | 14.5  | 5.2     | -64.1%      | 38.9  | 23.1    | -40.6%      | 0.17  | 0.25    | 47.1%       |
| CC   | 53      | 36941  | 11.2  | 2.6     | -76.8%      | 38.0  | 22.2    | -41.6%      | 0.28  | 0.37    | 32.1%       |
| YRD  | 34      | 23698  | 12.3  | 4.7     | -61.8%      | 33.7  | 20.1    | -40.4%      | 0.48  | 0.54    | 12.5%       |
| PRD  | 20      | 13940  | 9.8   | 2.4     | -75.5%      | 20.9  | 10.0    | -52.2%      | 0.30  | 0.39    | 30.0%       |

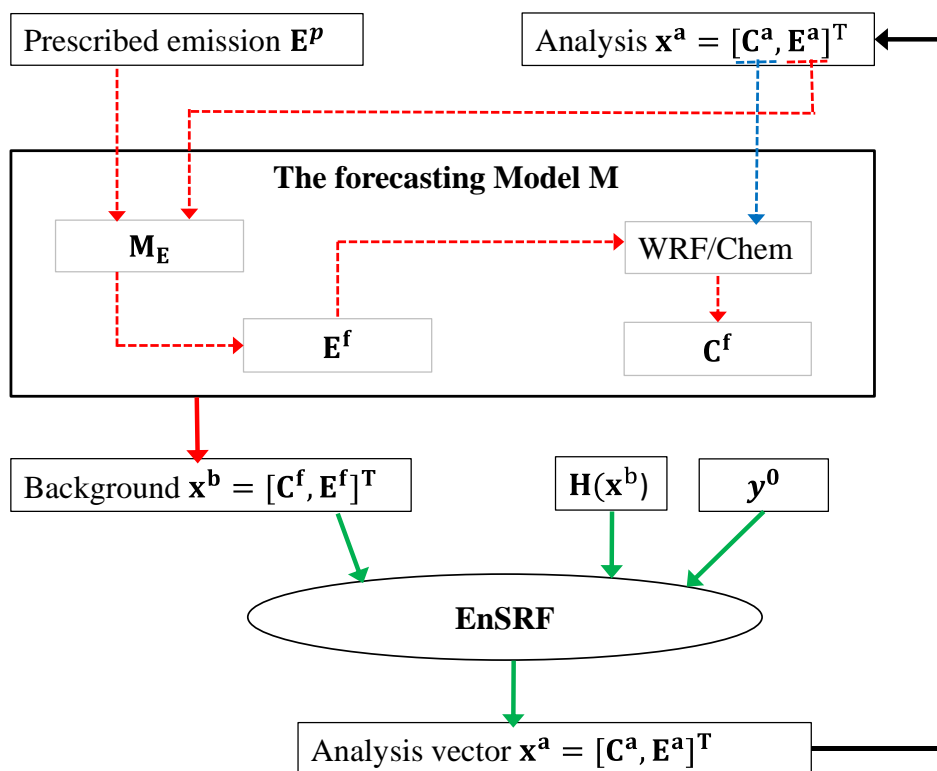

**Figure 1.** Flow chart of the data assimilation system that simultaneously optimizes the initial chemical conditions and emissions.

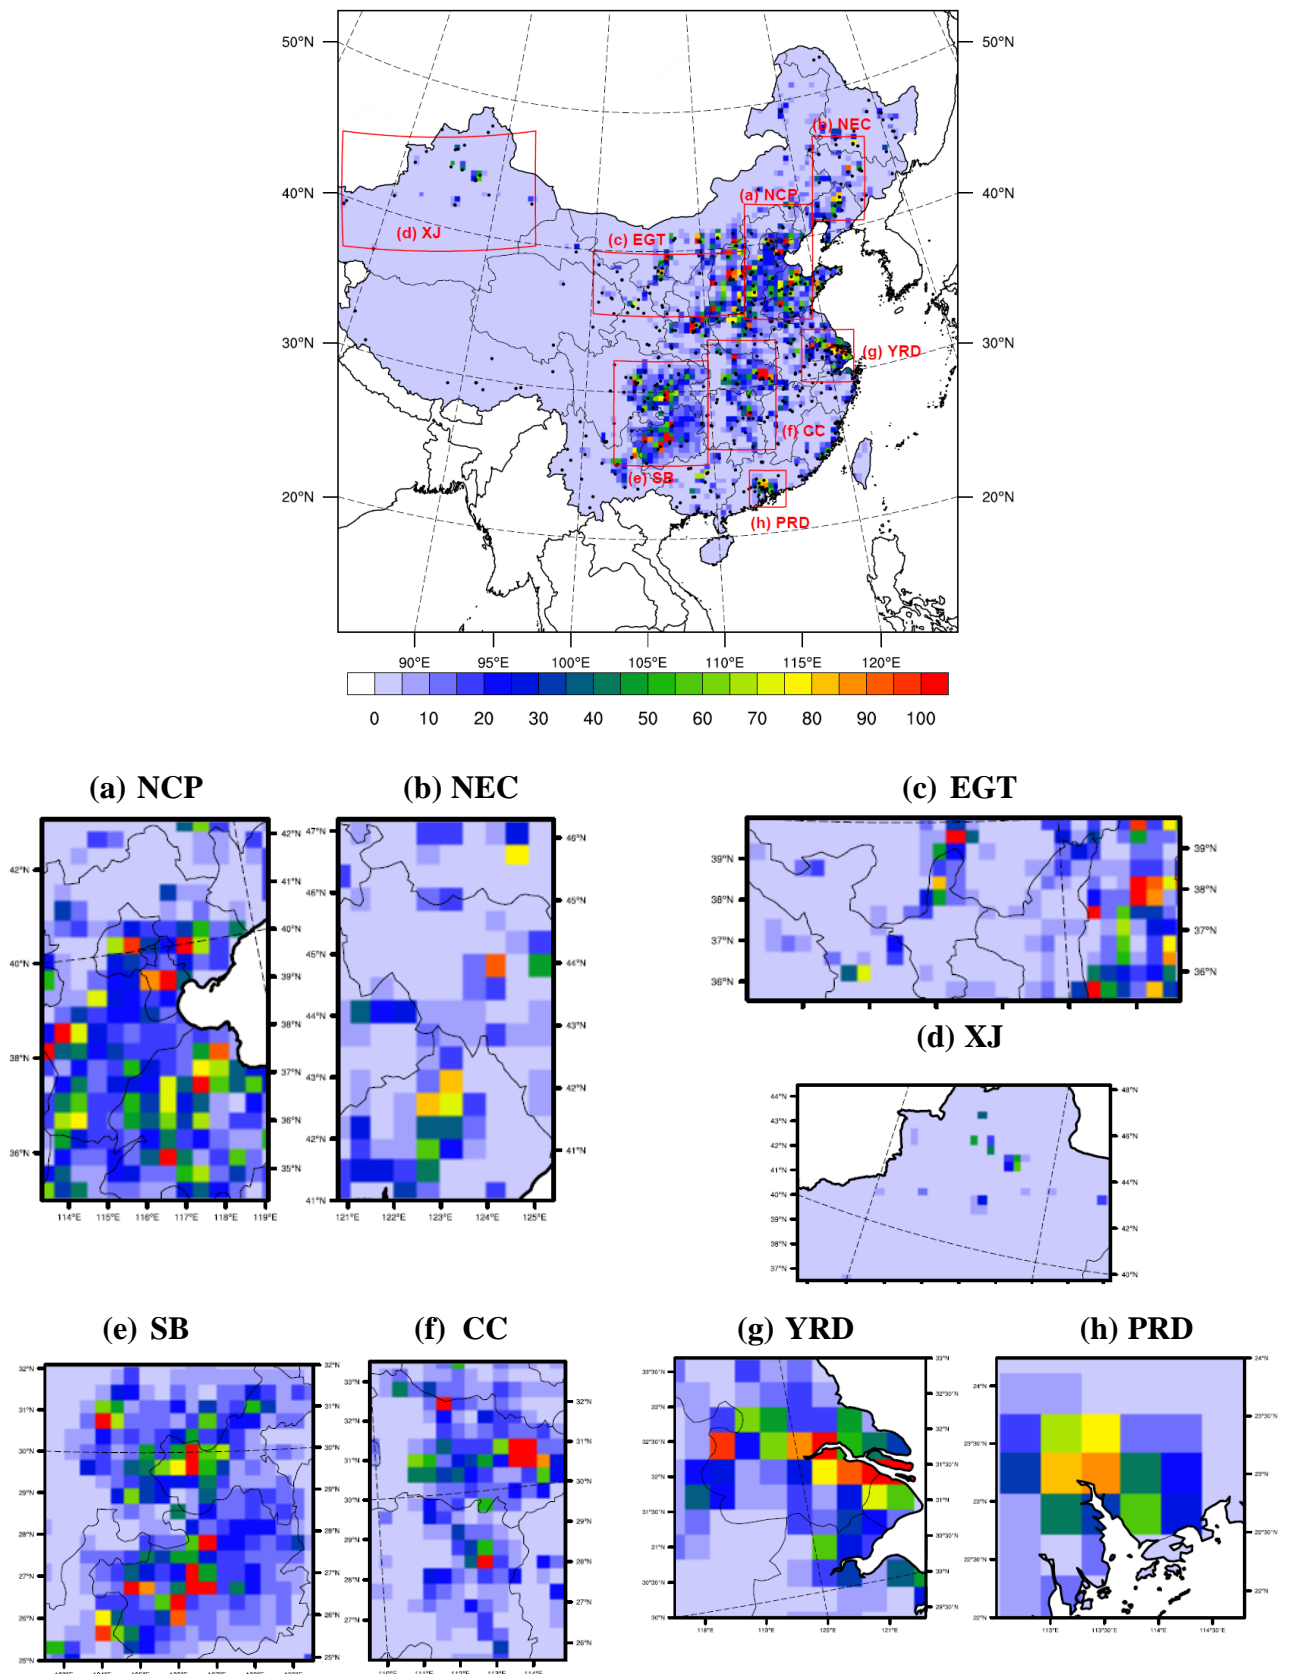

**Figure 2.** Spatial distribution of the priori SO<sub>2</sub> emissions used in this study. Regions defined in red rectangles are: a-NCP (the North China Plain), b-NEC (Northeastern China), c-EGT (the Energy Golden Triangle), d-XJ (Xinjiang), e-SB (the Sichuan Basin), f-CC (Central China), g-YRD (the Yangtze River Delta), and h-PRD (the Pearl River Delta). The color bars of the regional plots have the same meaning as those in the national one. Units: mol km<sup>-2</sup> h<sup>-1</sup>.



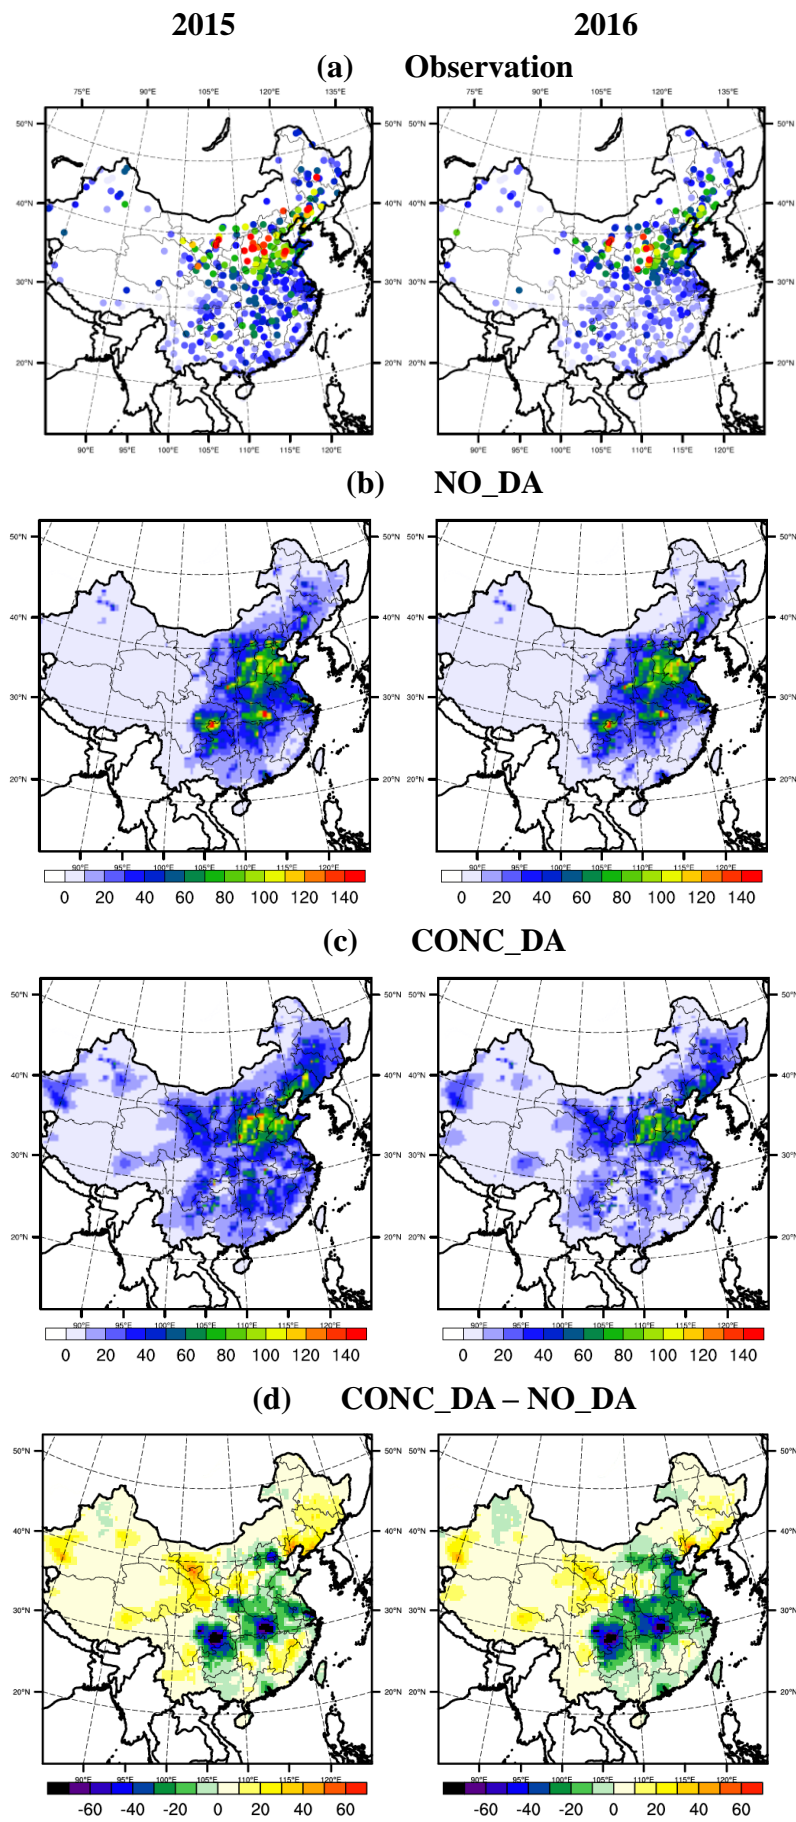

**Figure 3.** Observed and modeled monthly average  $\text{SO}_2$  concentrations for January in 2015 (Left) and 2016 (right). (a) Observations, where the ranges of the different colors are the same as those of the color bars of (b) and (c); (b) NO\_DA, (c) CONC\_DA, and (d) CONC\_DA-NO\_DA. Units:  $\mu\text{g m}^{-3}$ .

(a). 2015 - NO\_DA (top) and CONC\_DA (bottom)

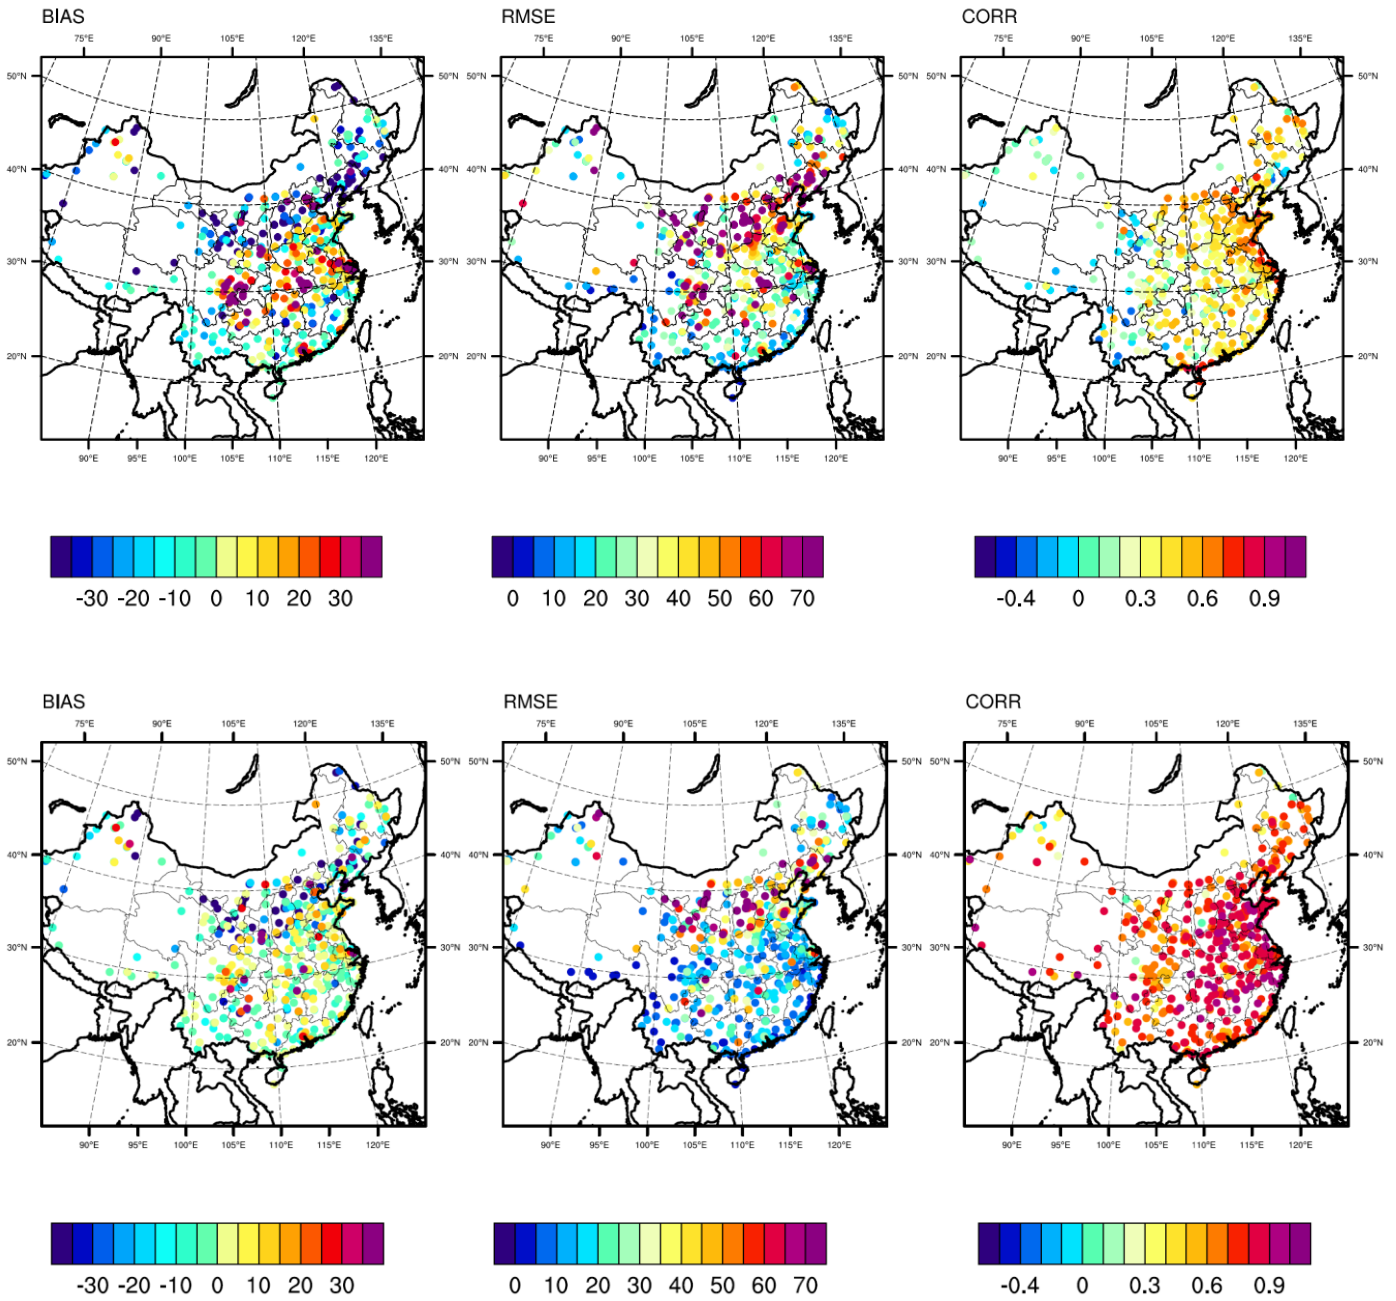

**Figure 4.** The spatial distribution of the statistics between the model simulations and the observations for (a) January 2015 and (b) January 2016. Top: NO\_DA vs. observation, bottom: CONC\_DA vs. observation. Units:  $\mu\text{g m}^{-3}$  for BIAS and RMSE.

(b). 2016 - NO\_DA (top) and CONC\_DA (bottom)

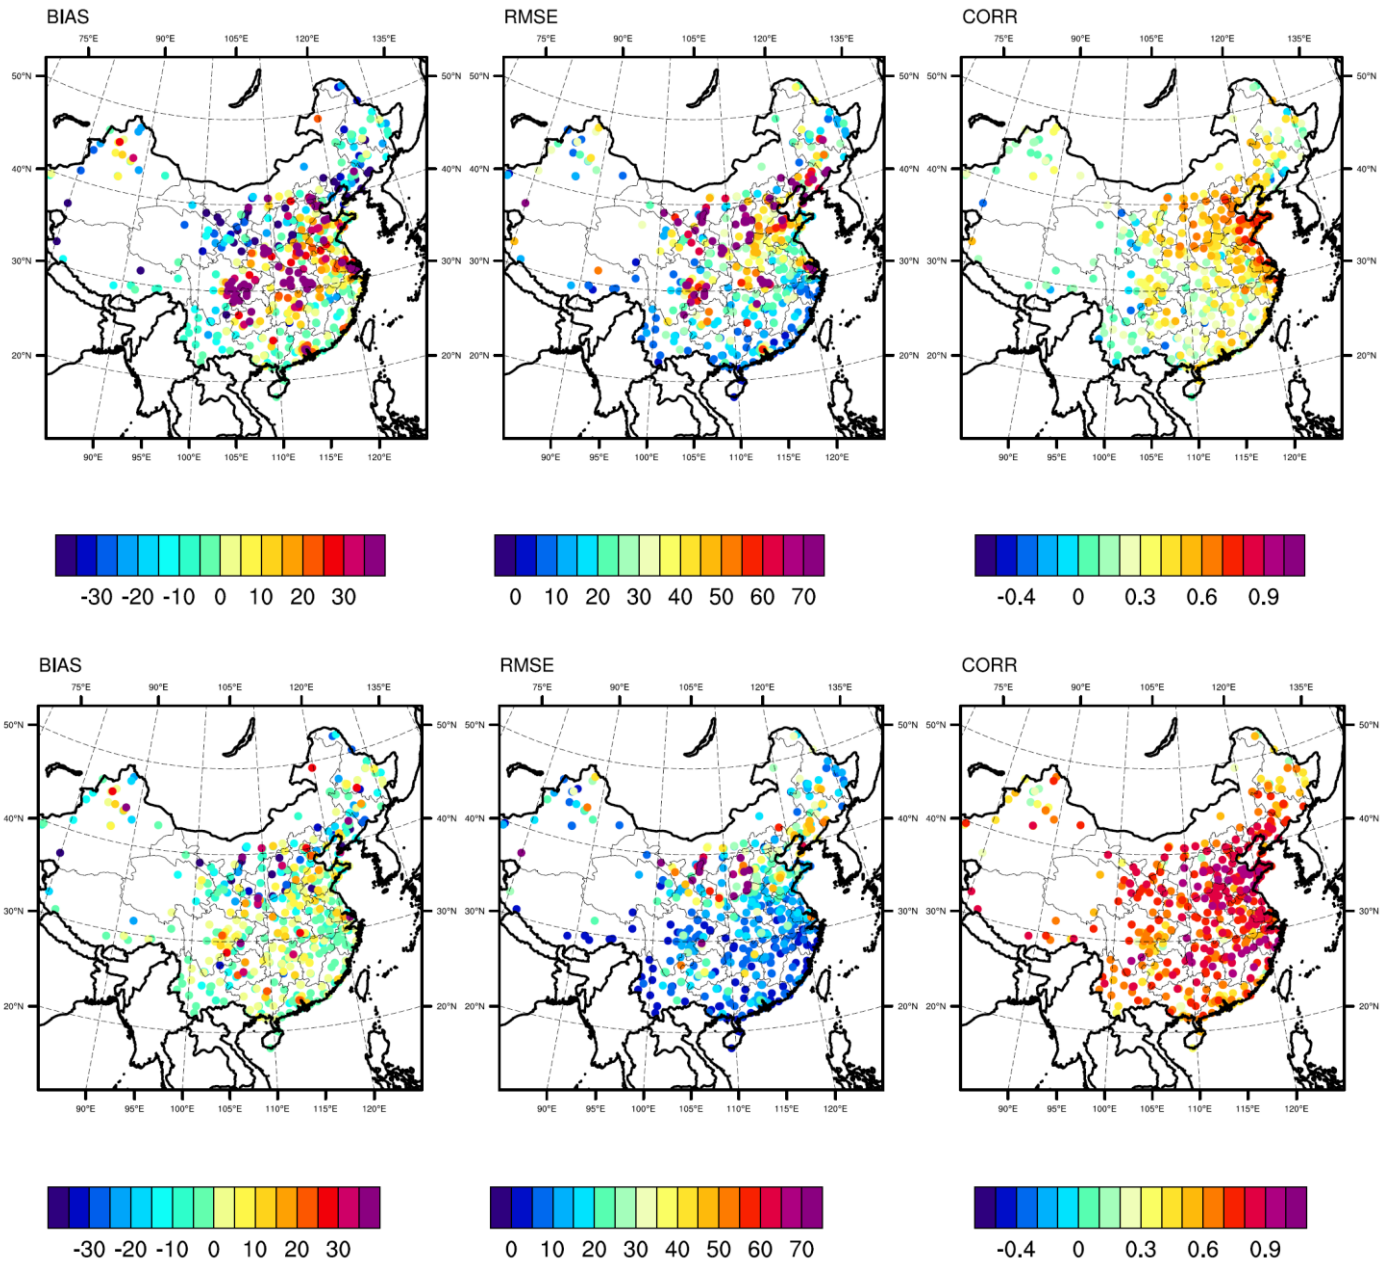

Figure 4. (b) Continue.

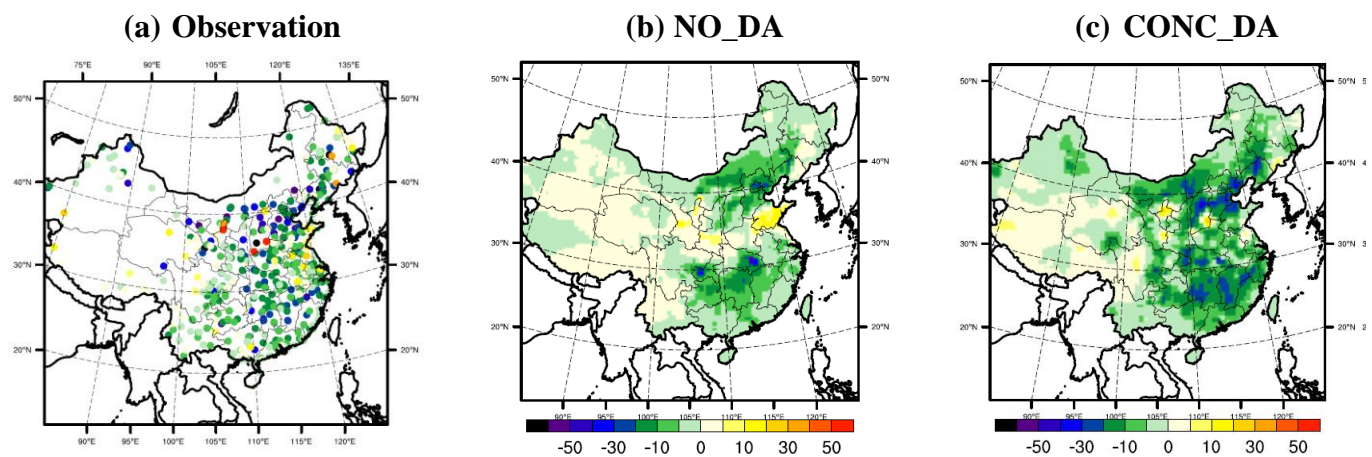

**Figure 5.** Observed and modeled SO<sub>2</sub> ambient concentration changes (January 2016 - January 2015). (a) Observations, where the ranges of different colors are the same as those of the color bars of (b) and (c), (b) NO\_DA, and (c) CONC\_DA. (Units:  $\mu\text{g m}^{-3}$ )



(a) 2015

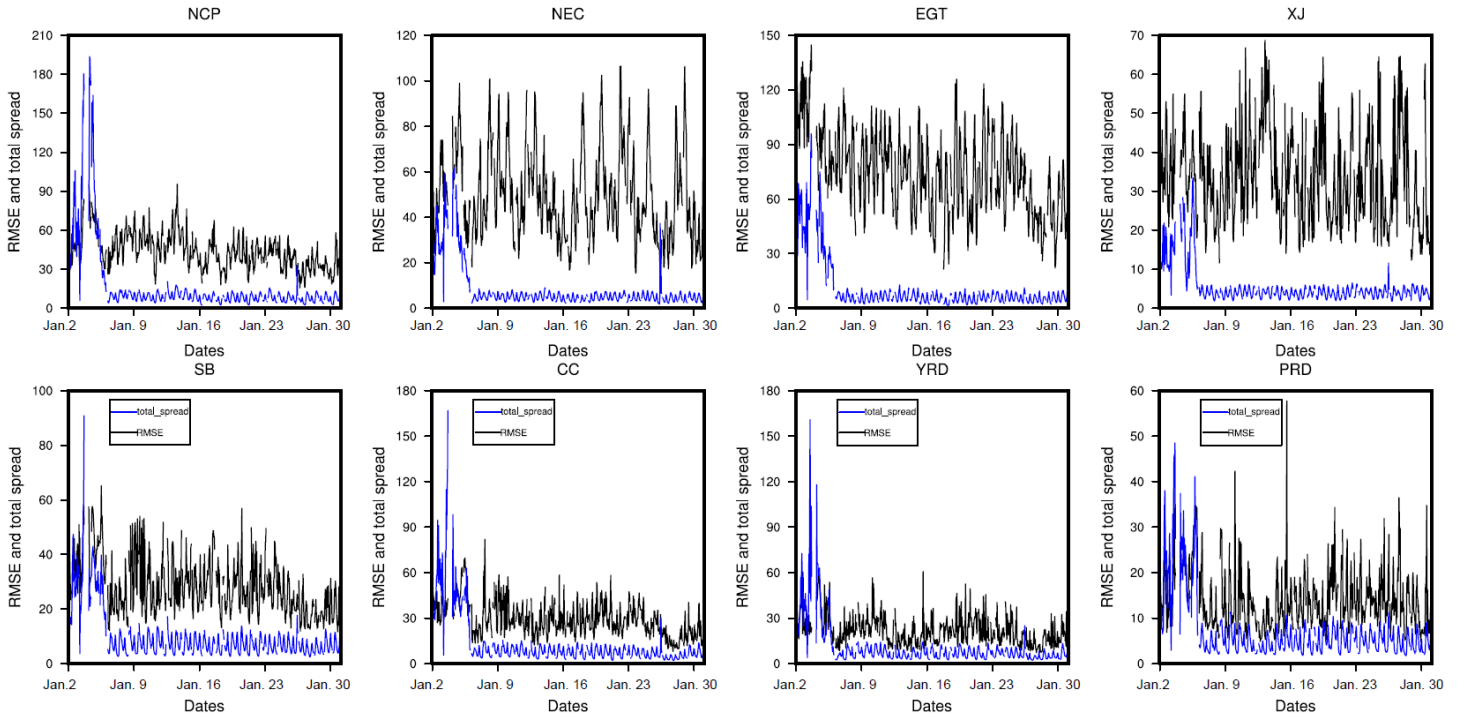

(b) 2016

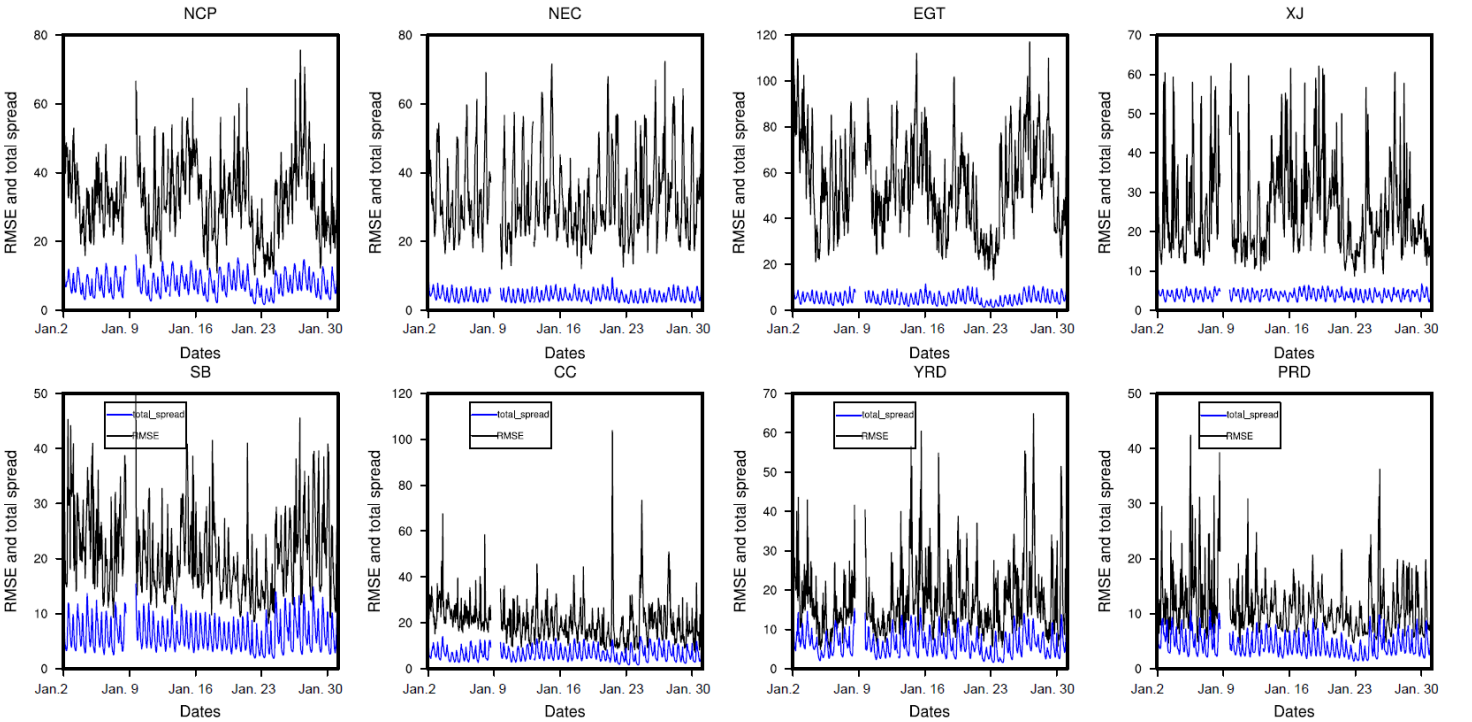

**Figure 6.** Regional averaged RMSE and the total spread for (a) January 2015 and (b) January 2016 in 8 regions. Time starts from 00UTC. (Units:  $\mu\text{g m}^{-3}$ ).

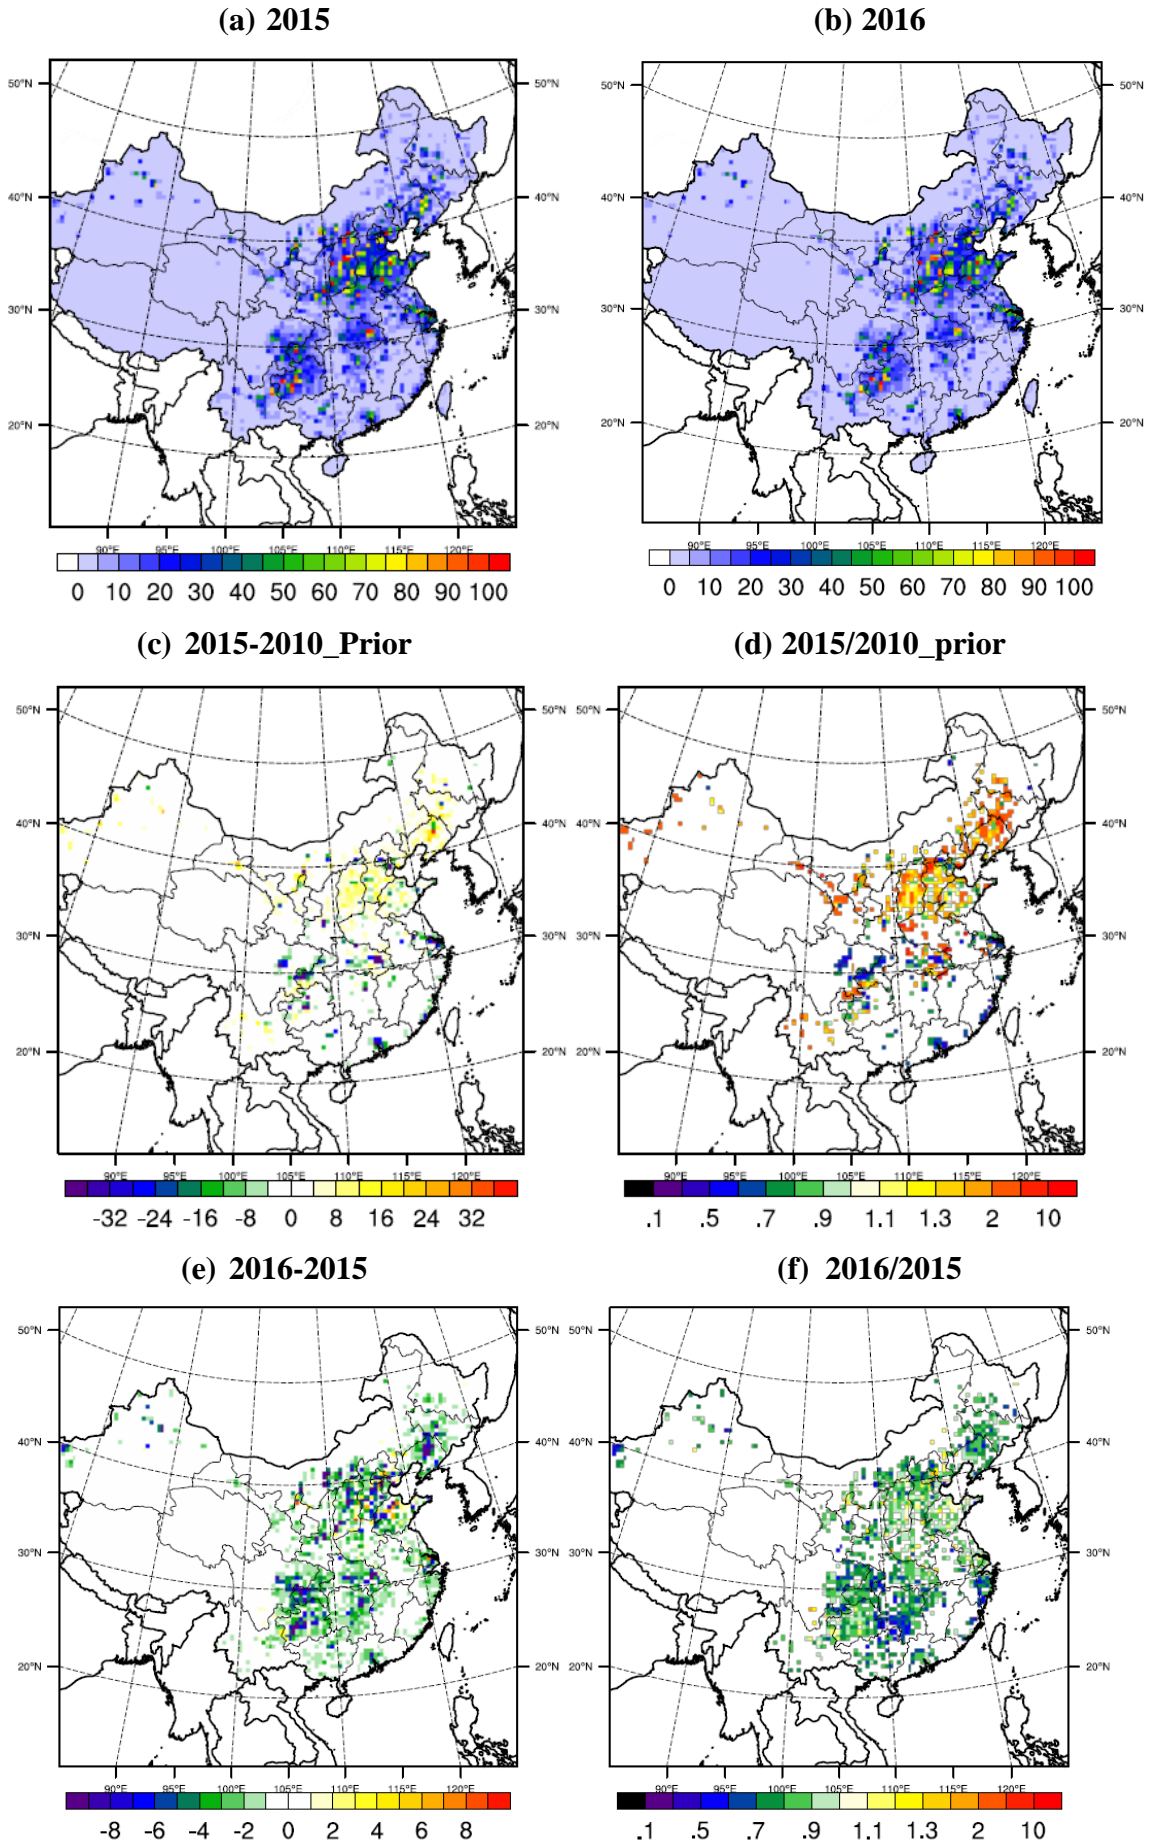

**Figure 7.** Analyzed emissions for (a) January 2015 and (b) January 2016. (c) The differences of the 2015-2010\_prior and (d) ratios of the 2015/2010\_prior. (e) The differences of the 2016-2015 and (f) ratios of 2016/2015. Units are  $\text{mol km}^{-2} \text{h}^{-1}$  for (a), (b), (c) and (e).

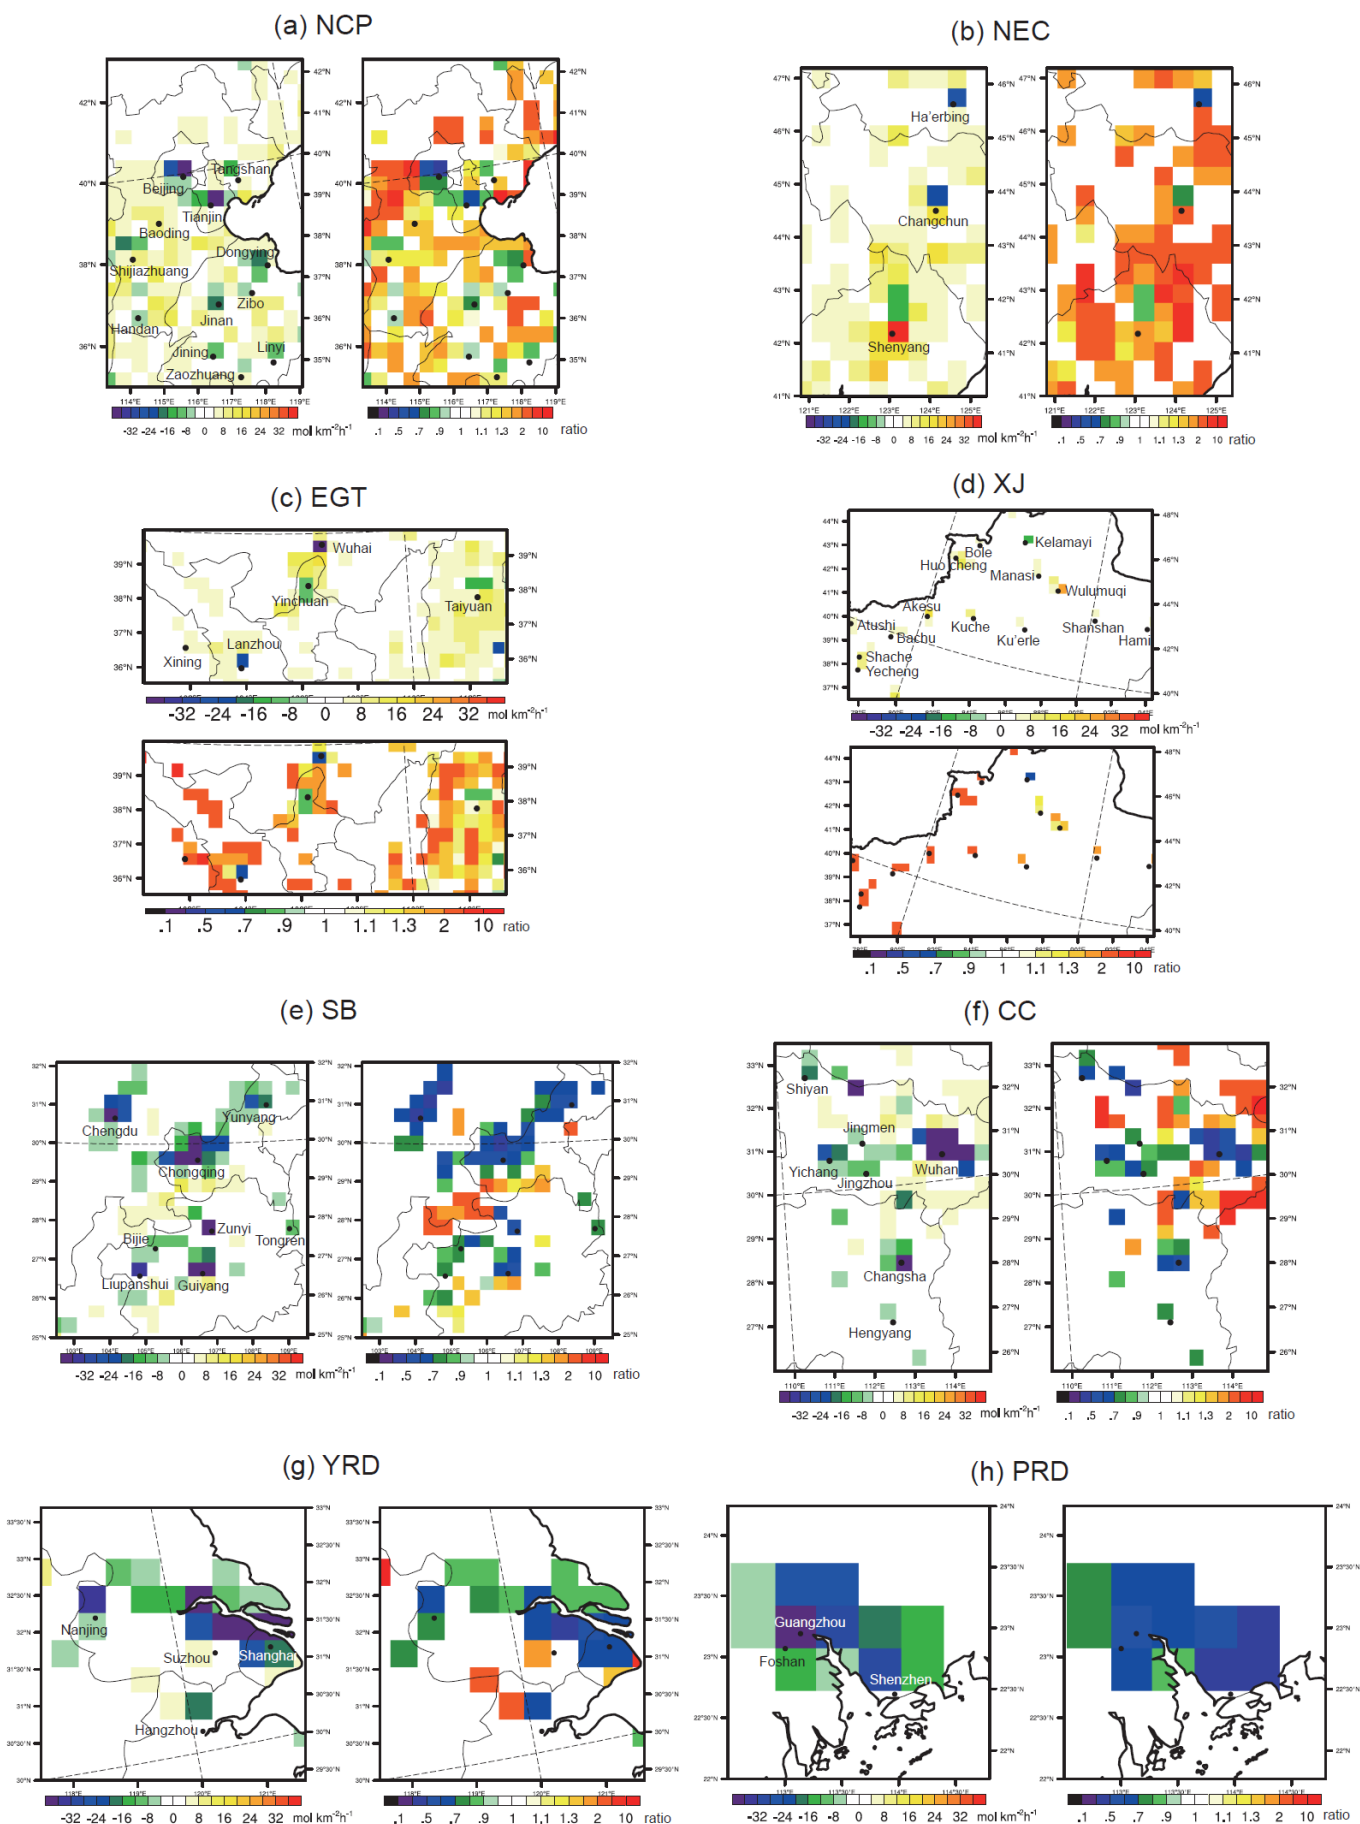

**Figure 8.** The differences between the analyzed 2015 January emissions and the 2010 priori emissions in 8 regions. Left panels are emission differences of 2015-2010 (units:  $\text{mol km}^{-2} \text{h}^{-1}$ ), and right panels are the ratios of 2015/2010 in each region.

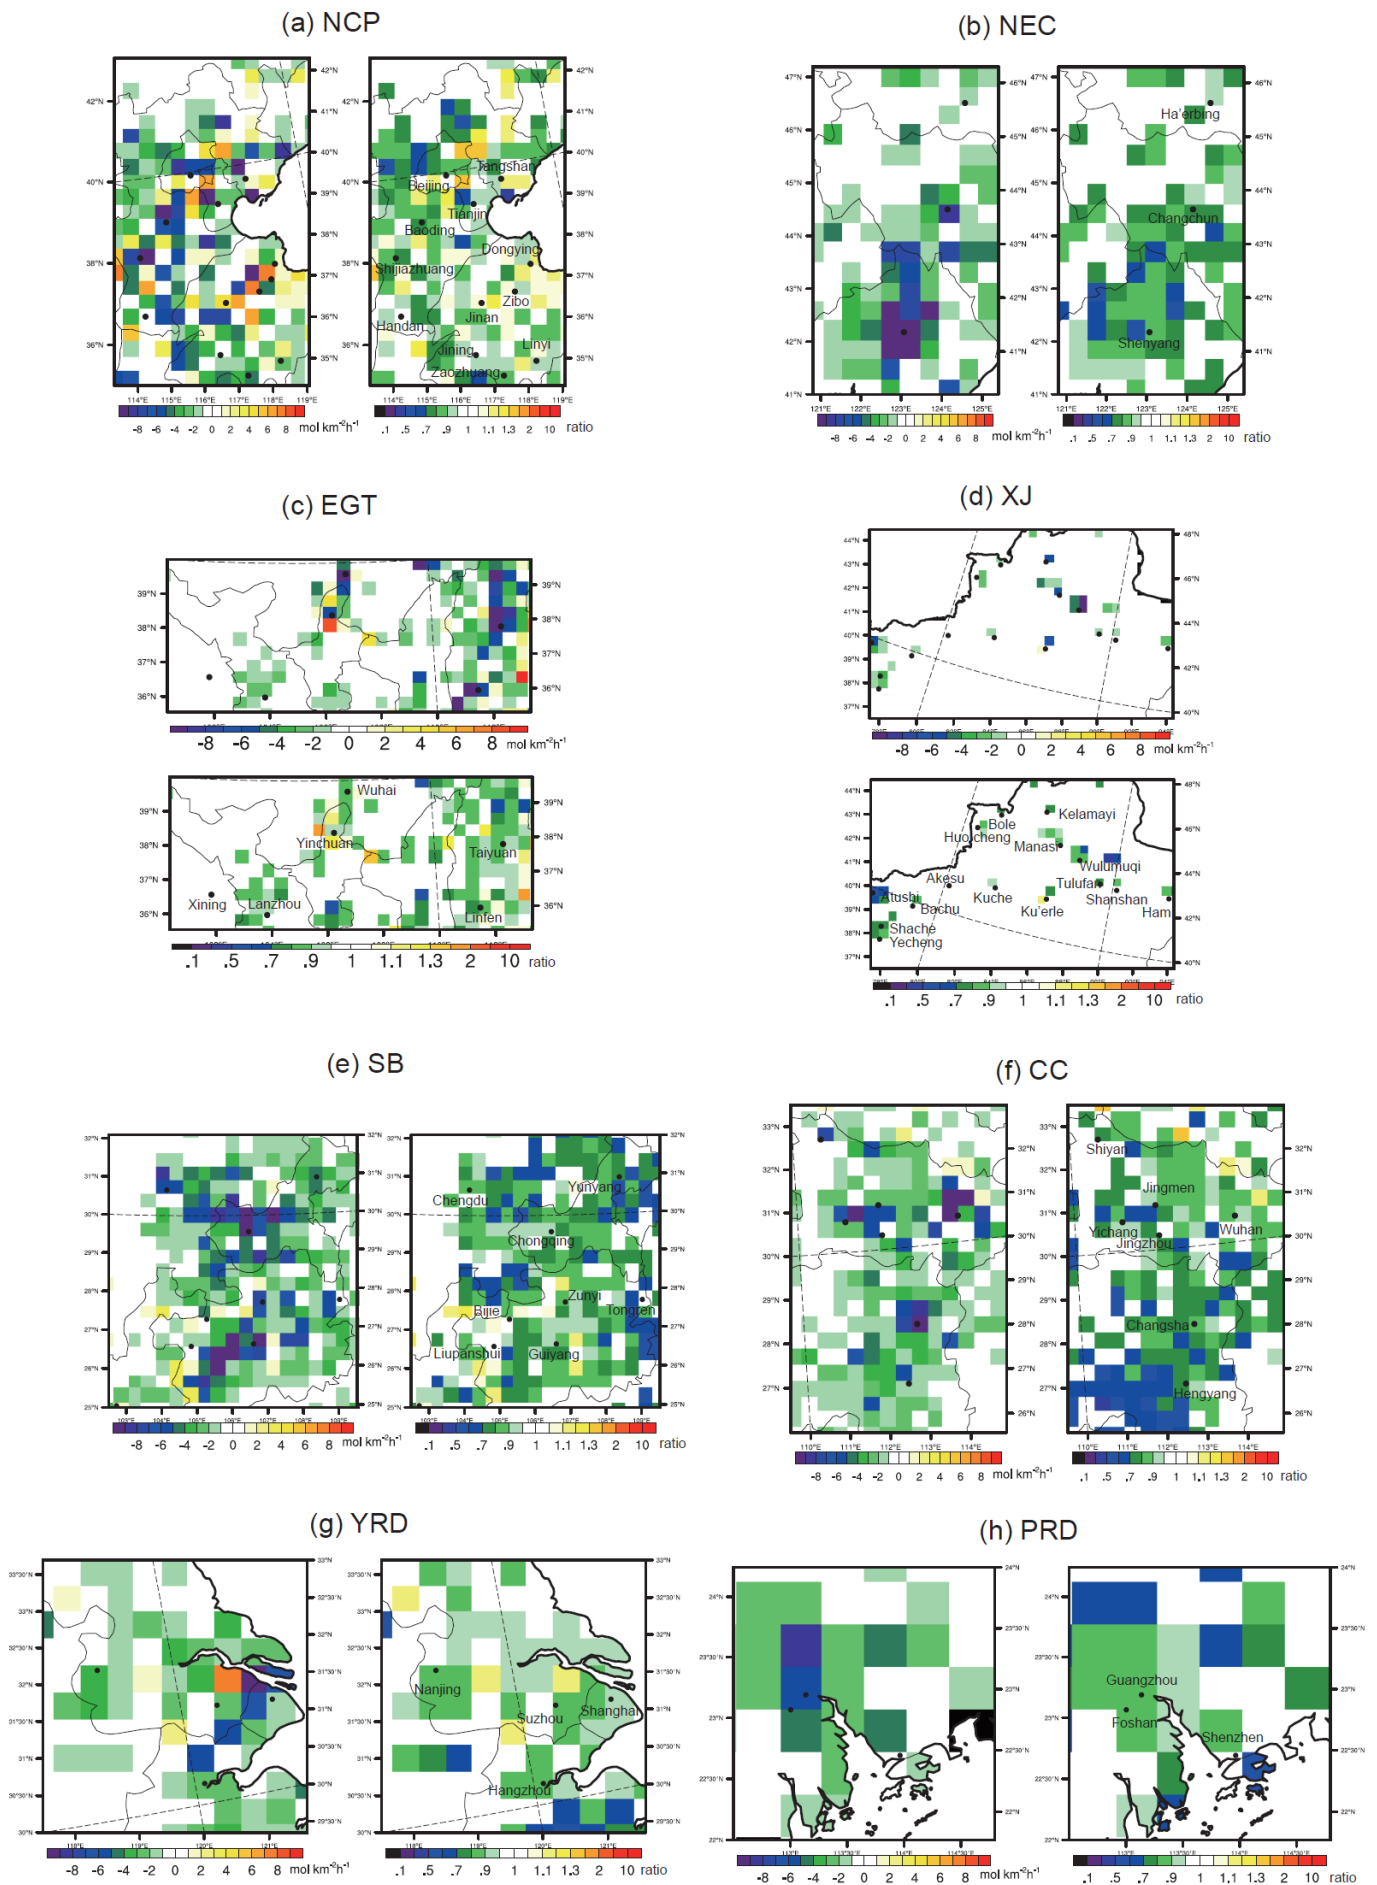

**Figure 9.** Same as Figure 8, but for the differences between the analyzed 2016 January emissions and the 2015 January emissions in 8 regions. Left panels are emission differences of 2016-2015 (units:  $\text{mol km}^{-2} \text{h}^{-1}$ ), and right panels are the ratios of 2016/2015 in each region.



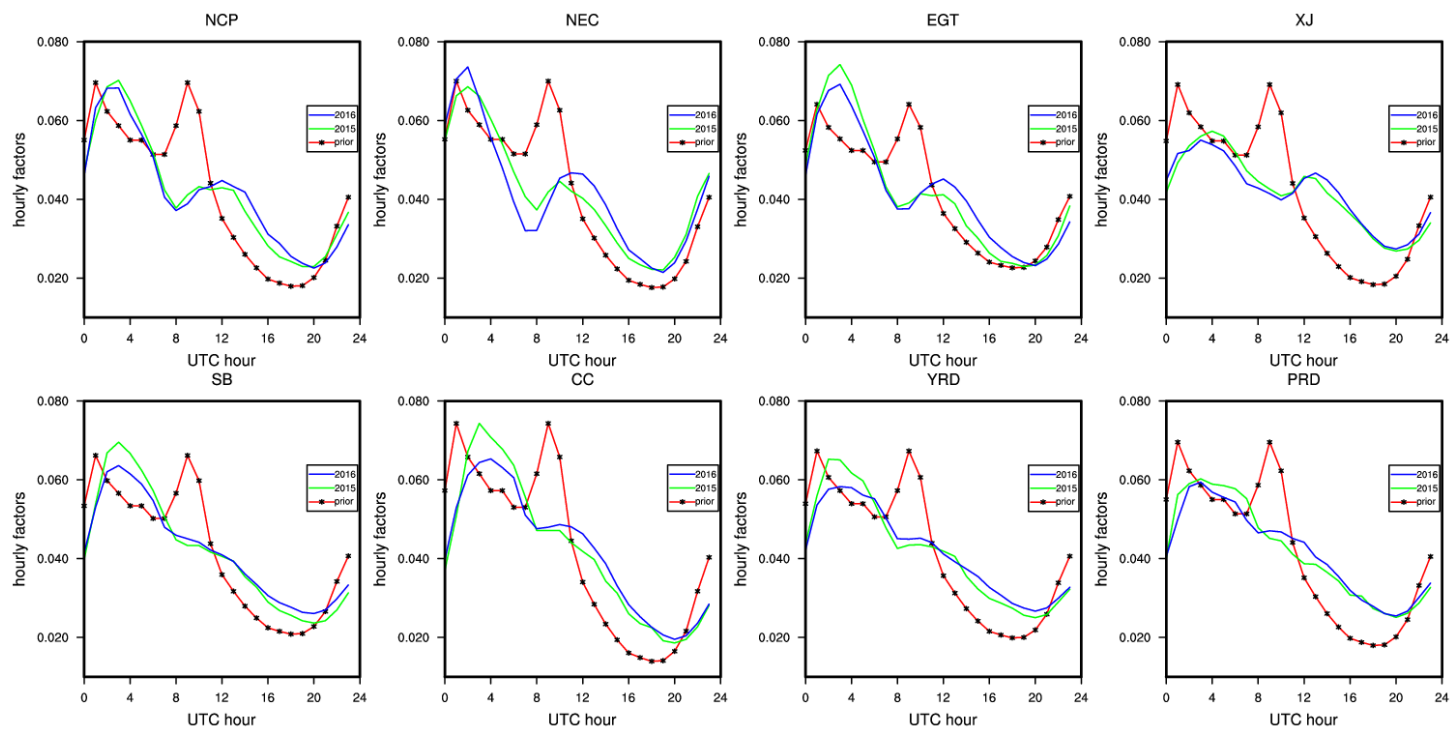

**Figure 10.** Hourly factors in the priori emission inventory and those derived from the EMIS\_DA experiment in 8 regions.

**(a) NO\_DA\_FCST**

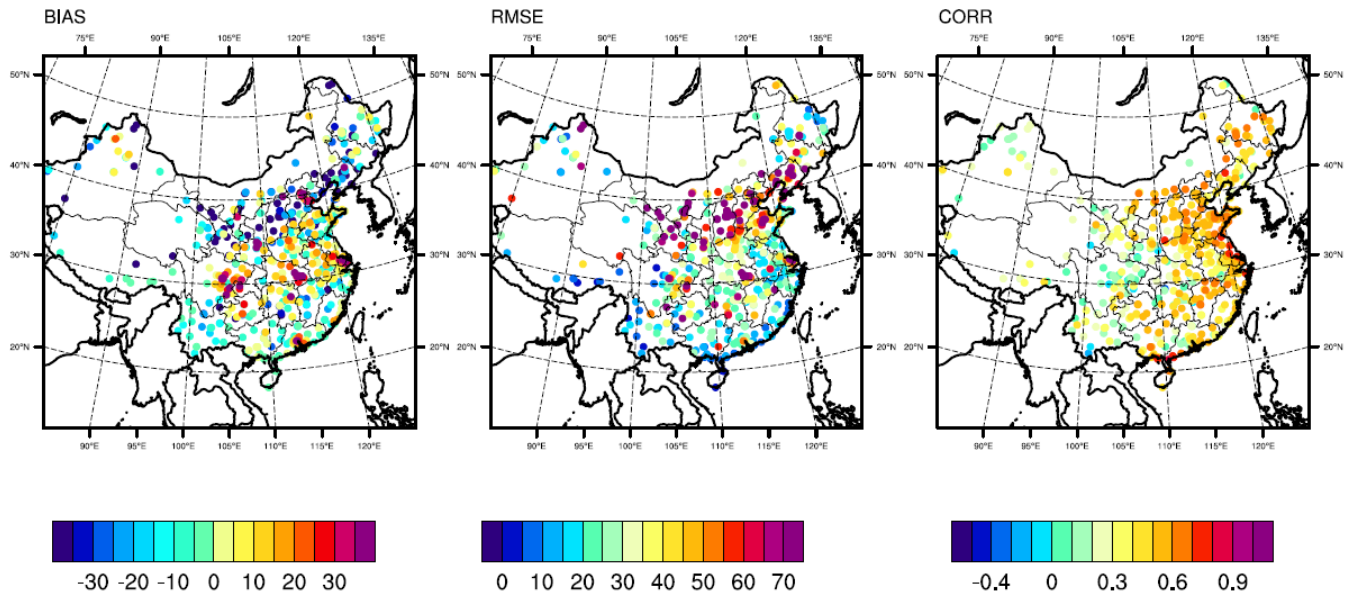

**(b) Differences (EMIS\_DA\_FCST - NO\_DA\_FCST) - Group A**

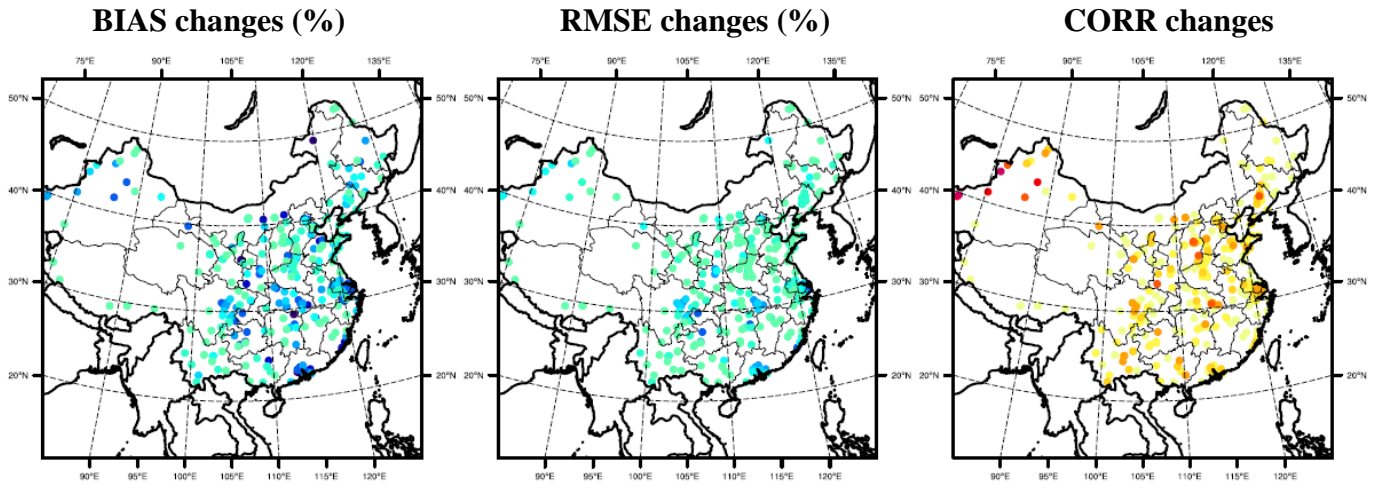

**(c) Group B**

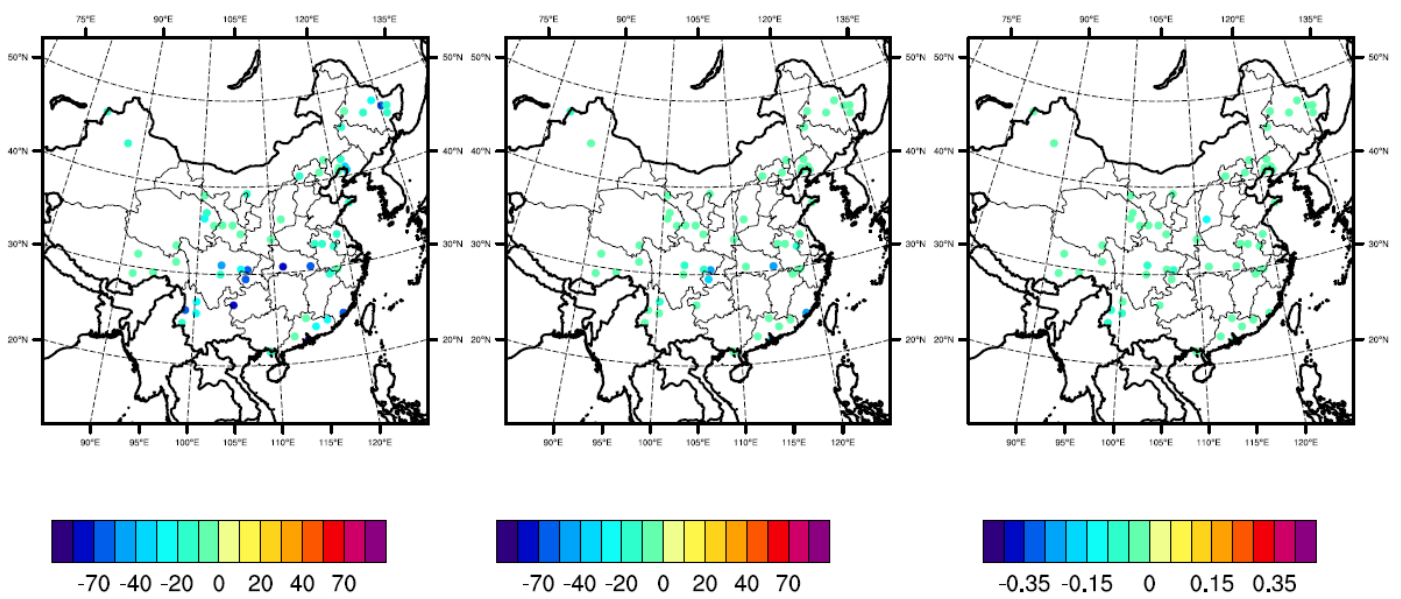

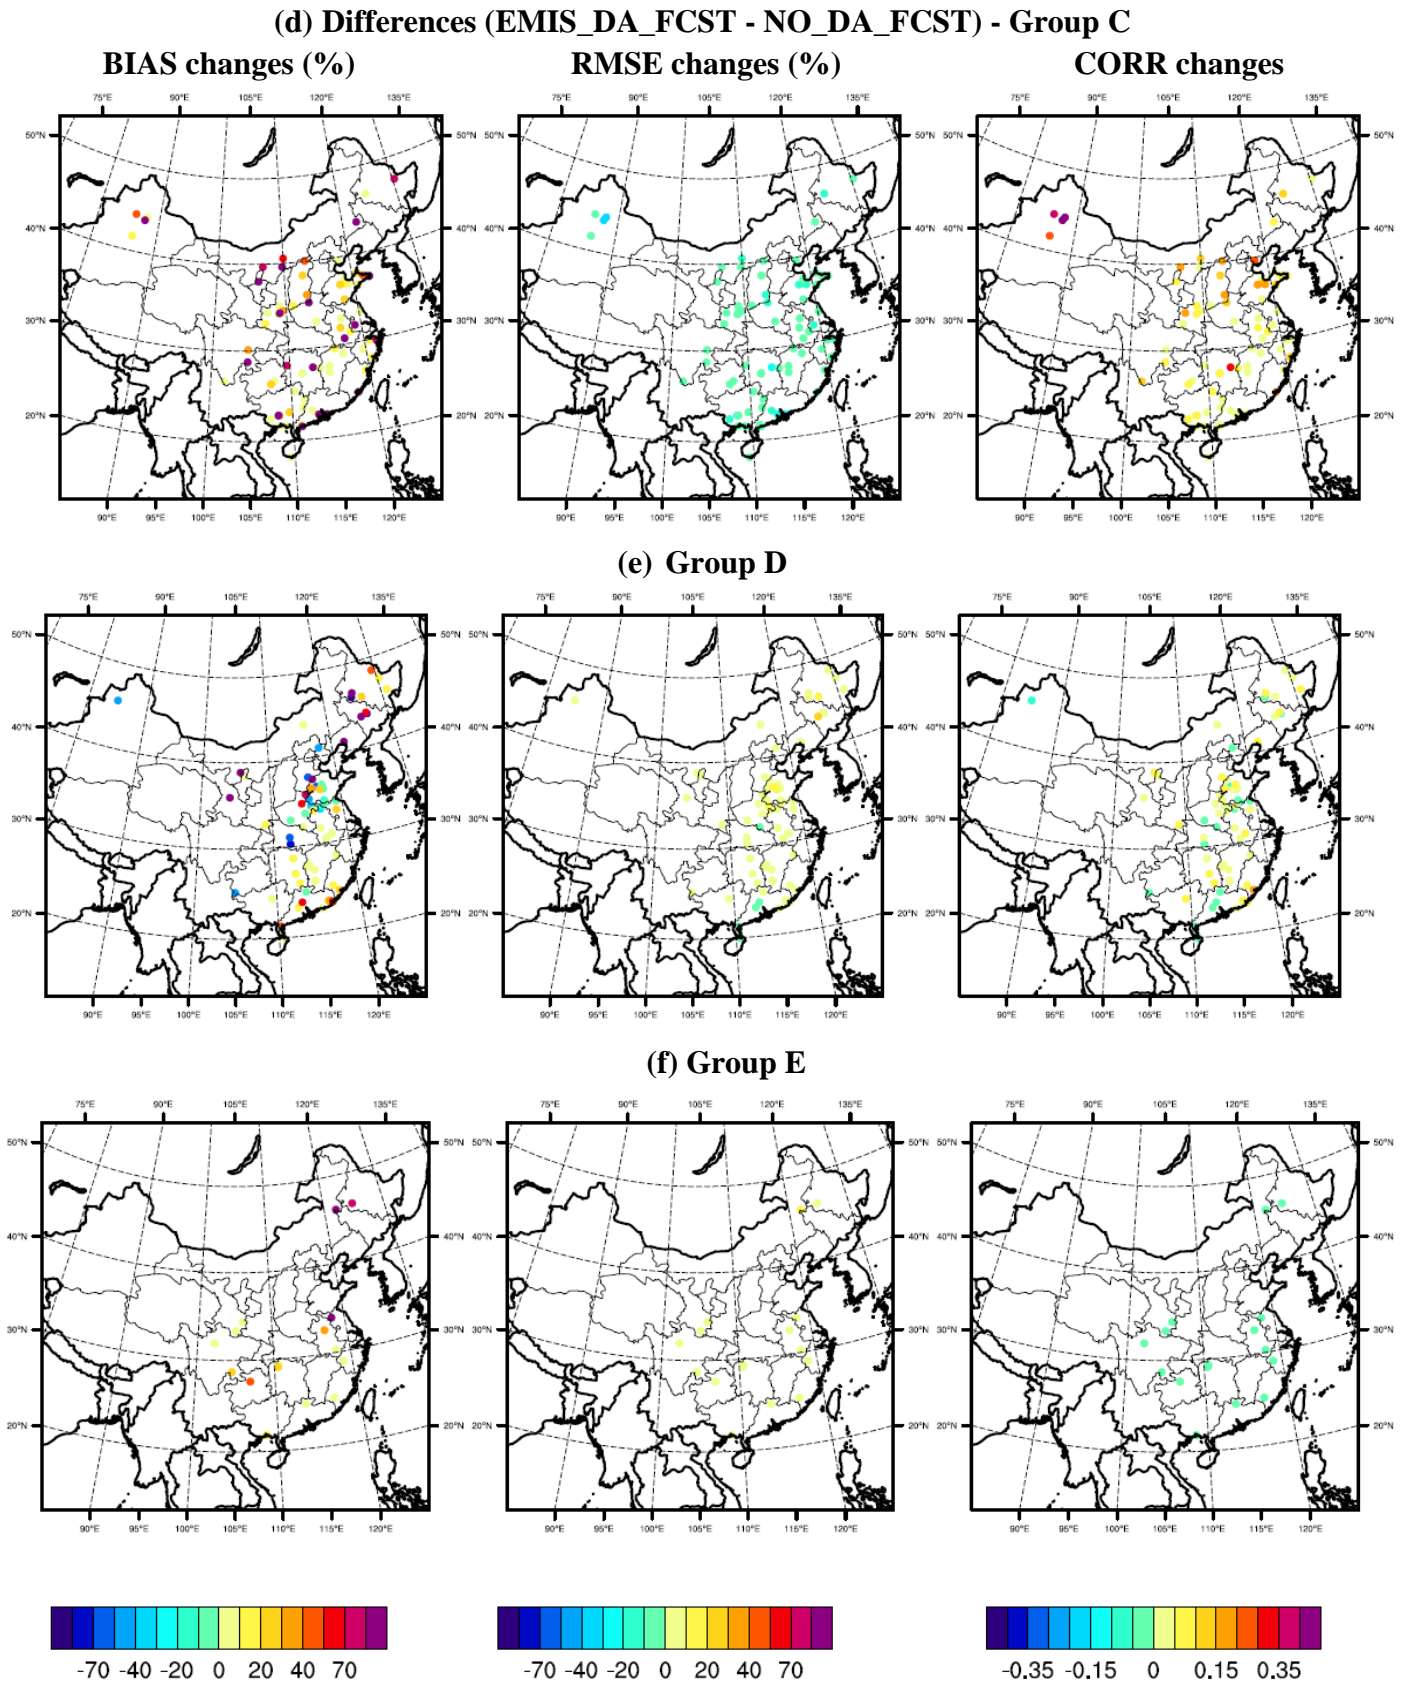

**Figure 11.** The spatial distribution of the error statistics between the model simulations and the observations for January 2015. (a) Statistics between NO\_DA\_FCST and the observations, with BIAS and RMSE in  $\mu\text{g m}^{-3}$ ; (b)-(f) the statistics improvements from NO\_DA\_FCST to EMIS\_DA\_FCST for different groups of sites (classification in Table 2), with the BIAS and RMSE improvements in percentages. The color bars are all the same for (b)-(f) and are shown only in (c) and (f) to save space.



(a) NO\_DA\_FCST

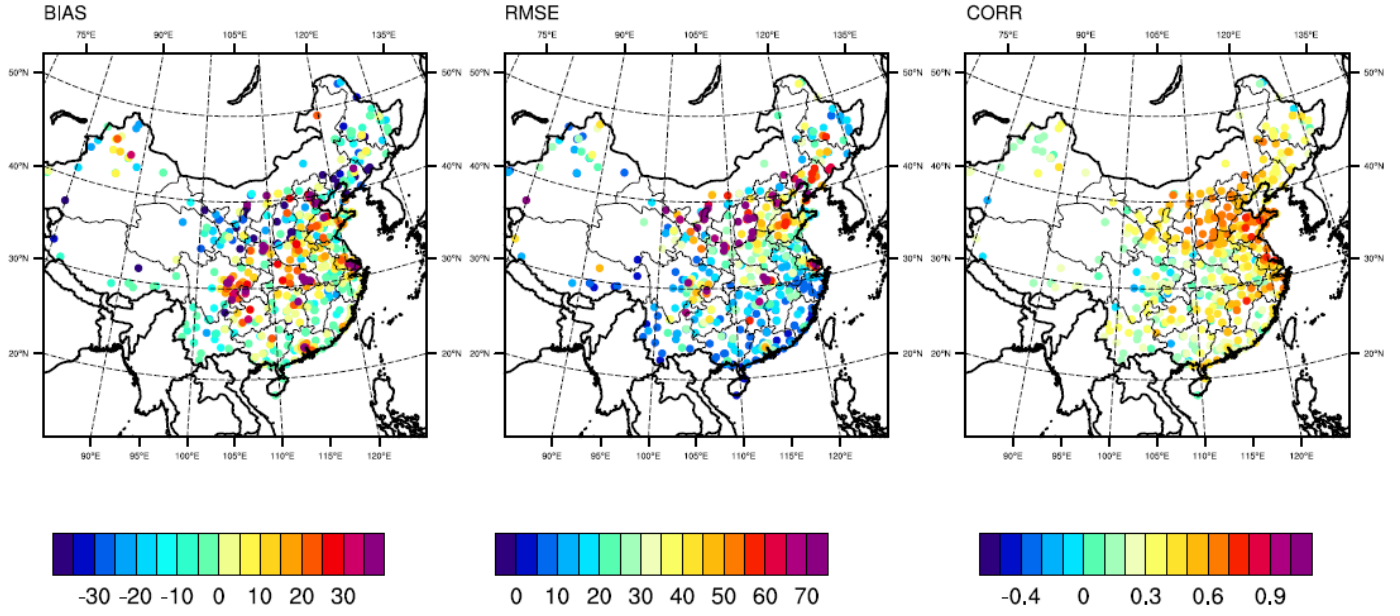

(b) Differences (EMIS\_DA\_FCST - NO\_DA\_FCST) - Group A

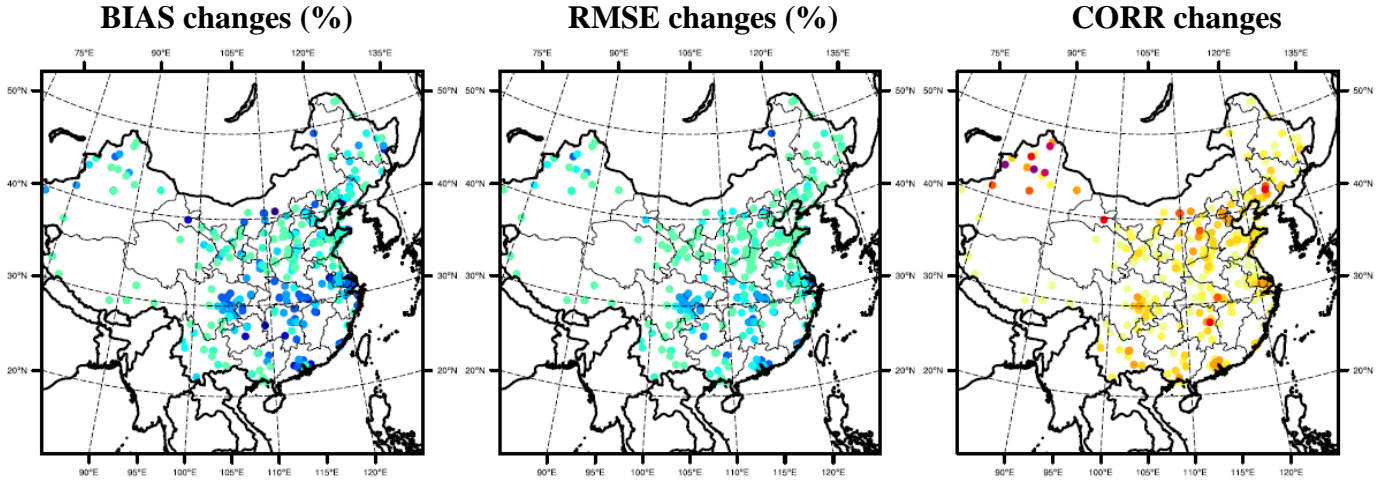

(c) Group B

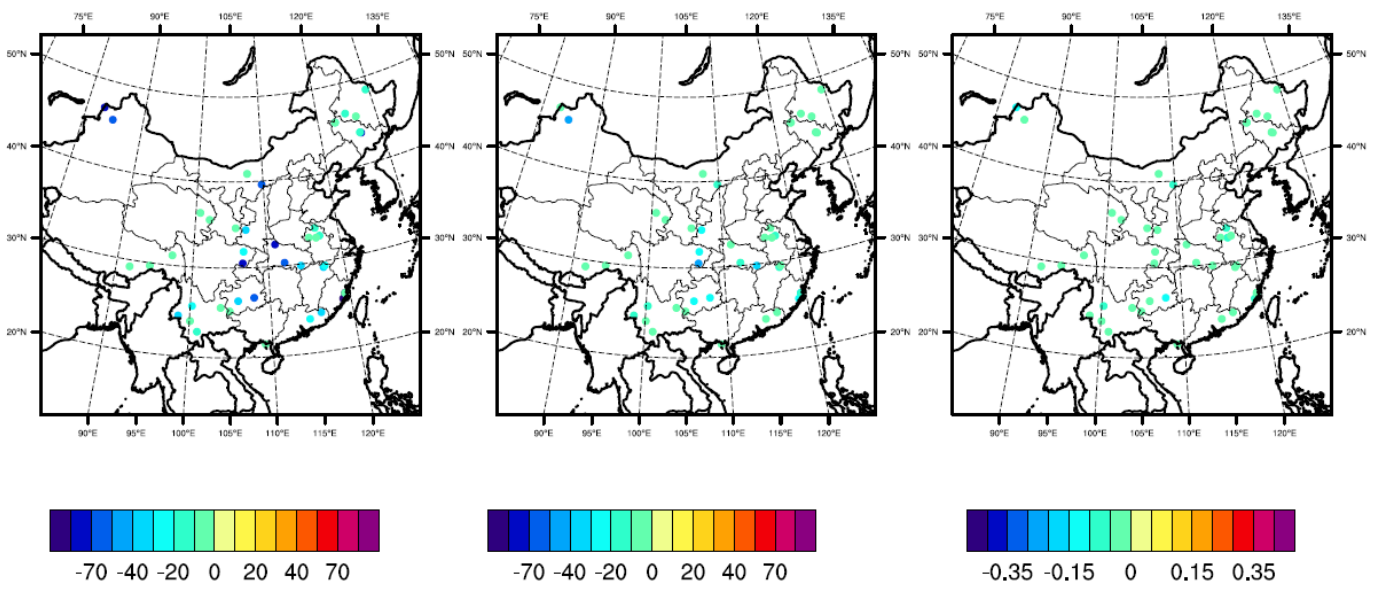

(d) Differences (EMIS\_DA\_FCST - NO\_DA\_FCST) - Group C

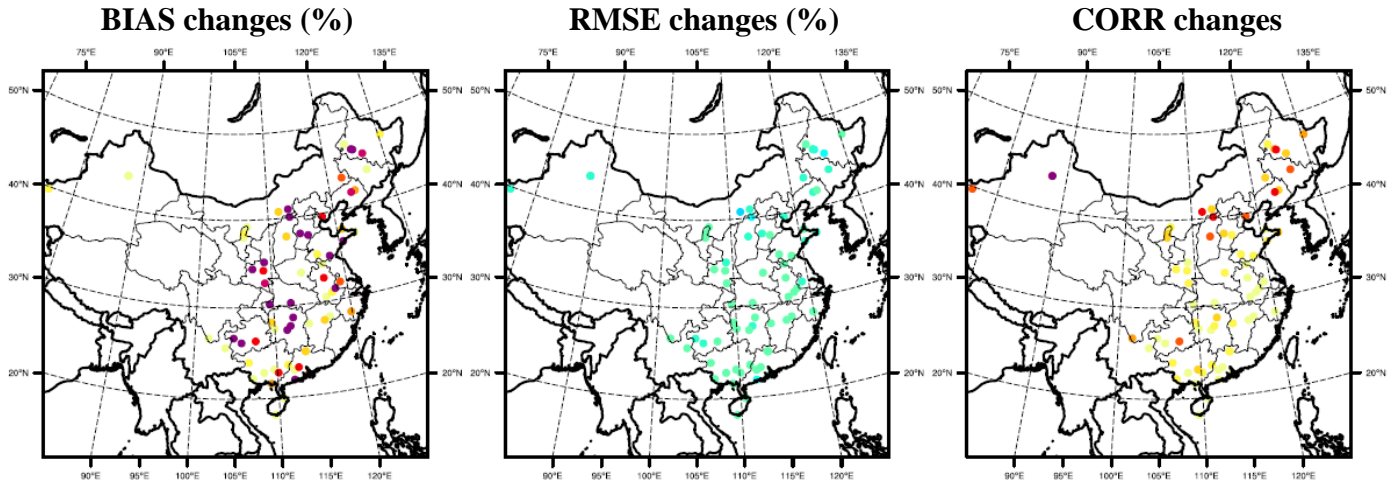

(e) Group D

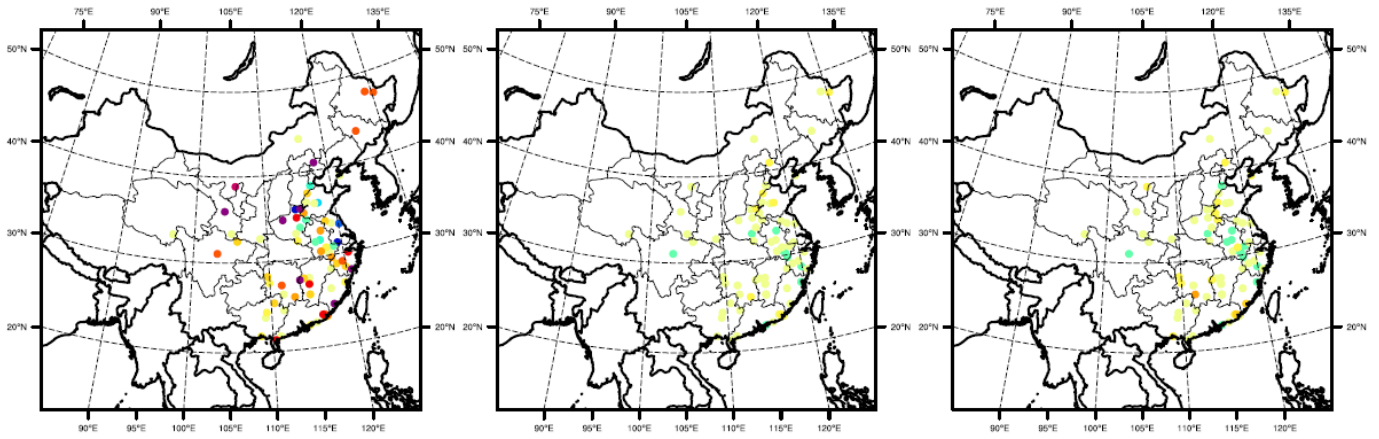

(f) Group E

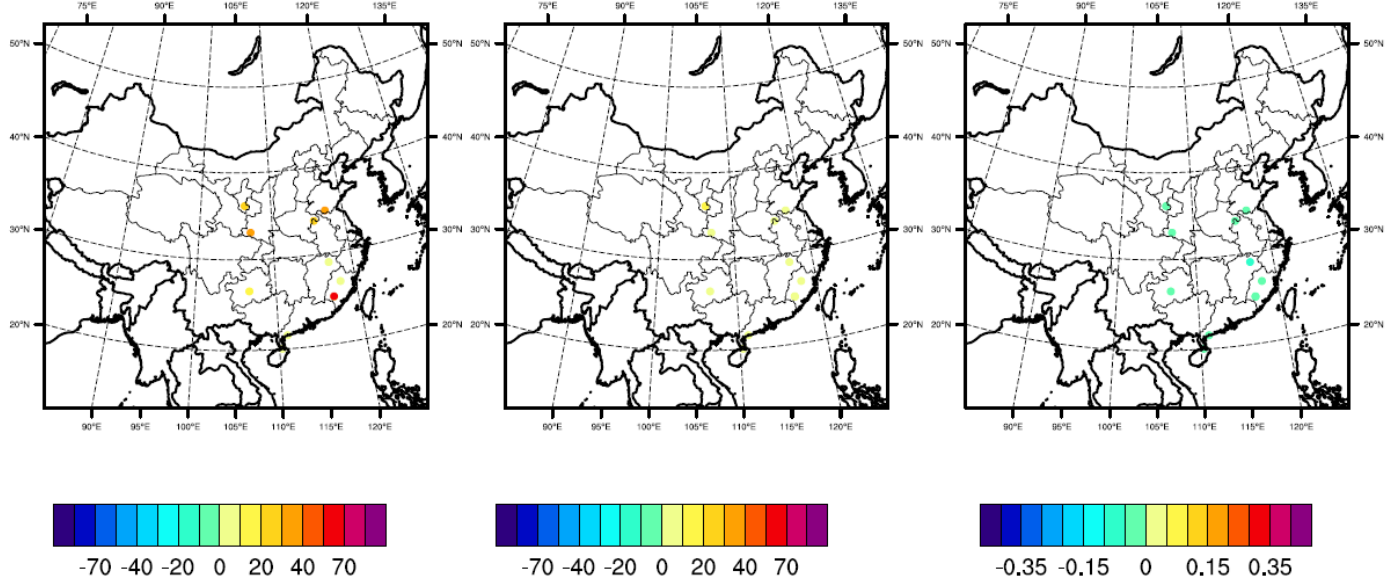

Figure 12. Same as Figure 11, but for January 2016.

(a)

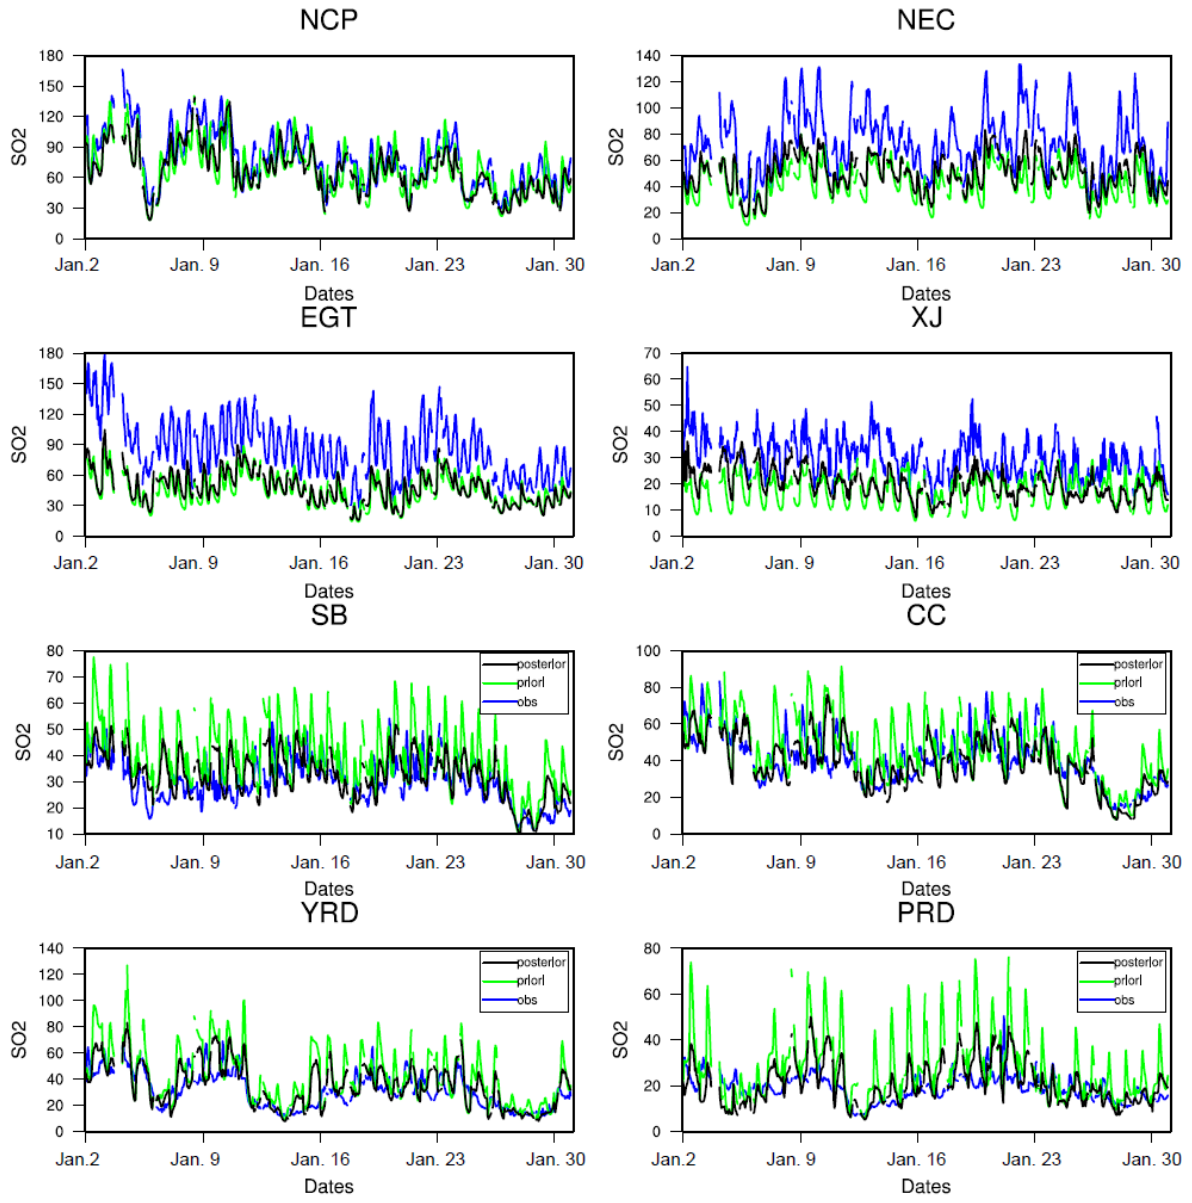

**Figure 13.** Time series of the regional mean SO<sub>2</sub> concentrations from the observations and from model simulations with the priori and analyzed (posterior) emissions for (a) January 2015 and (b) January 2016 in 8 regions. Time starts from 00UTC. (Units:  $\mu\text{g m}^{-3}$ )

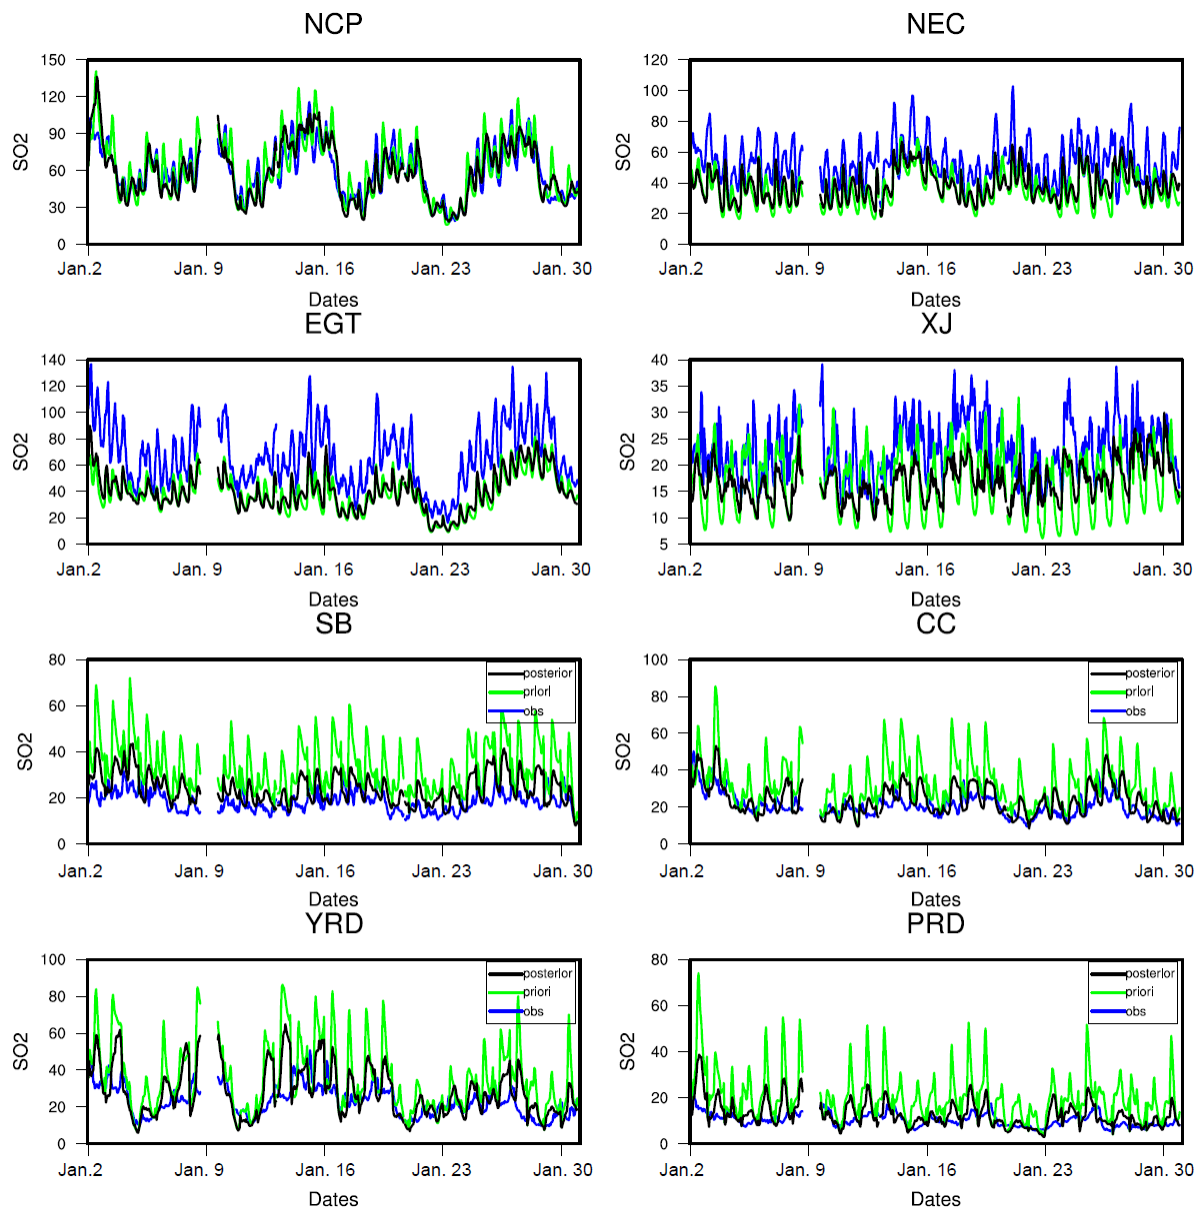

**Figure 13(b) Continue.**
